# Supplementary material for: Asymmetric synthesis of 1H-pyrazolo[3,4-b]pyridine analogues catalyzed by chiral-at-metal Rh(iii) complexes
Source: Royal Society of Chemistry journal article supplement (doi:10.1039/d4qo01100g), 2024-01-01
Supplement: d4qo01100g1.pdf [file d4qo01100g1.pdf]

## Supporting Information

### **Asymmetric Synthesis of 1H-pyrazolo[3,4-b]pyridine Analogues Catalyzed by Chiral-at-Metal Rh(III) Complexes**

Xiang Ji<sup>a</sup>, Shijie Zhu<sup>a</sup>, Yongsheng Li<sup>a,\*</sup>, Zhifei Zhao<sup>a</sup>, Shi-Wu Li<sup>a,\*</sup>

<sup>a</sup>School of Chemistry and Chemical Engineering/State Key Laboratory Incubation Base for Green Processing of Chemical Engineering, Shihezi University, Shihezi, Xinjiang 832003, China.

E-mail: lishiwu@shzu.edu.cn.

## Table of Contents

|                                                        |             |
|--------------------------------------------------------|-------------|
| <b>I. General Information.....</b>                     | <b>S-1</b>  |
| <b>II. Experimental Section.....</b>                   | <b>S-2</b>  |
| <b>III. References.....</b>                            | <b>S-21</b> |
| <b>IV. NMR Spectrum.....</b>                           | <b>S-22</b> |
| <b>V. Chiral HPLC analysis trace.....</b>              | <b>S-52</b> |
| <b>VI. Single Crystal X-Ray Diffraction of 4g.....</b> | <b>S-80</b> |

## I General Information

Commercially available materials were used as received, unless otherwise noted, all reactions and manipulations involving air- or moisture-sensitive compounds were performed using standard Schlenk technique. Without special instructions, the heating reactions used are all using an oil bath. Reactions were checked by TLC analysis and plates were visualized with short-wave UV light (254 nm). The  $^1\text{H}$ ,  $^{13}\text{C}$  NMR and  $^{19}\text{F}$  spectra were obtained in  $\text{CDCl}_3$  using a Bruker-BioSpin AVANCE III HD NMR spectrometer at 400 MHz, 100 MHz and 376 MHz respectively. Chemical shifts are reported in parts per million ( $\delta$  value) calibrated against the residual solvent peak. The determination of e.e. was performed via chiral HPLC analysis using Shimadzu LC-20A HPLC workstation. HPLC analysis of the compounds was done using chiralcel IC column using hexane and isopropanol as eluent, and the column temperature is 40 °C. The Rudolph Autopol V polarimeter was employed to gauge the optical rotation. The melting point was measured by Shanghai Instrument electrooptical SGW X-4A micro melting point instrument. High resolution mass spectra(HRMS) were recorded on Thermo Scientific Q Exactive mass spectrometry equipped with an APCI source. Crystal structure data was collected on a SuperNova, Dual, Cu at zero, Atlas diffractometer. The following abbreviations are used to designate chemical shift multiplicities: s = singlet, d = doublet, t = triplet, q = quartet, m = multiplet.

## II Experimental Section

**$\Lambda$ -Rh** was prepared according to reported procedure.<sup>[1]</sup> 5-Aminopyrazoles and  $\beta,\gamma$ -unsaturated  $\alpha$ -keto esters were synthesized according to reported procedures.<sup>[2-3]</sup>

### 1. General procedure for pyrazol-amine.

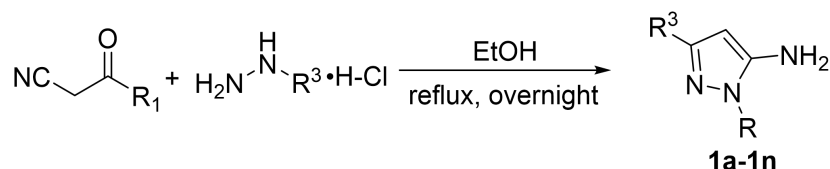

Aryl formyl acetonitrile (1 equiv) was dissolved into EtOH (0.3 M relative to aryl formyl acetonitrile), then Hydrazine monohydrochloride (2 equiv) was added. The reaction was heated to reflux overnight until consumption of the Aryl formyl acetonitrile (monitored by TLC). A saturated solution of NaHCO<sub>3</sub> (aq.) was added and the aqueous phase was extracted with CH<sub>2</sub>Cl<sub>2</sub>. The organic mixture was dried by Na<sub>2</sub>SO<sub>4</sub> and concentrated under reduced pressure. The concentrate was purified by silica gel flash chromatography (PE/EtOAc=6:1-2:1) to afford **1**.

### 2. General procedure for synthesis of Compounds **3**.

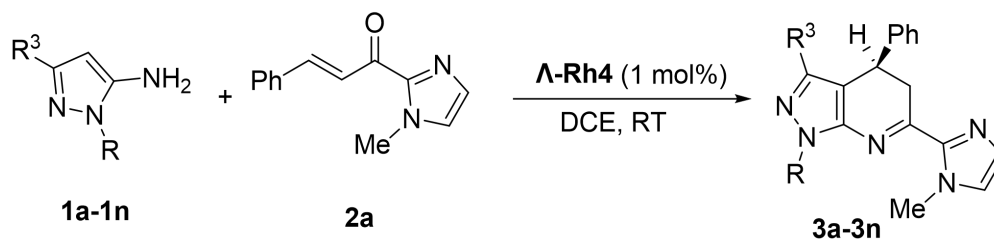

To an oven-dried 10 mL Schlenk tube equipped with a stir bar,  **$\Lambda$ -Rh4** (1 mol%) was added along with  $\alpha,\beta$ -unsaturated 2-acyl imidazole **2** (21.2 mg, 0.10 mmol, 1.0 equiv) and pyrazol-amine **1** (0.12 mmol, 1.2 equiv) in DCE (0.5 mL). The reaction was stirring at room temperature until consumption of the 2-acyl imidazole (monitored by TLC). The solution was directly purified by silica gel column chromatography (PE/EtOAc=4:1-1:1) to afford **3**.

### 3. General procedure for synthesis of Compounds **4**.



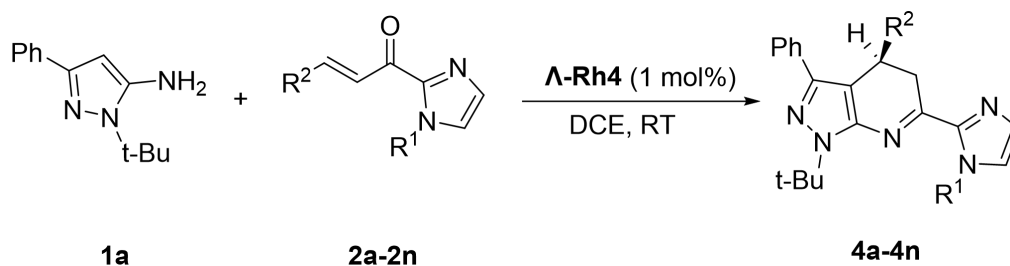

To an oven-dried 10 mL Schlenk tube equipped with a stir bar,  $\Lambda\text{-Rh4}$  (1 mol%) was added along with  $\alpha,\beta$ -unsaturated 2-acyl imidazole **2** (0.10 mmol, 1.0 equiv) and pyrazol-amine **1** (25.8 mg, 0.12 mmol, 1.2 equiv) in DCE (0.5 mL). The reaction was stirring at room temperature until consumption of the 2-acyl imidazole (monitored by TLC). The solution was directly purified by silica gel column chromatography (PE/EtOAc=4:1-1:1) to afford **4**.

#### 4. General procedure for gram-scale experiments of product **3a**.

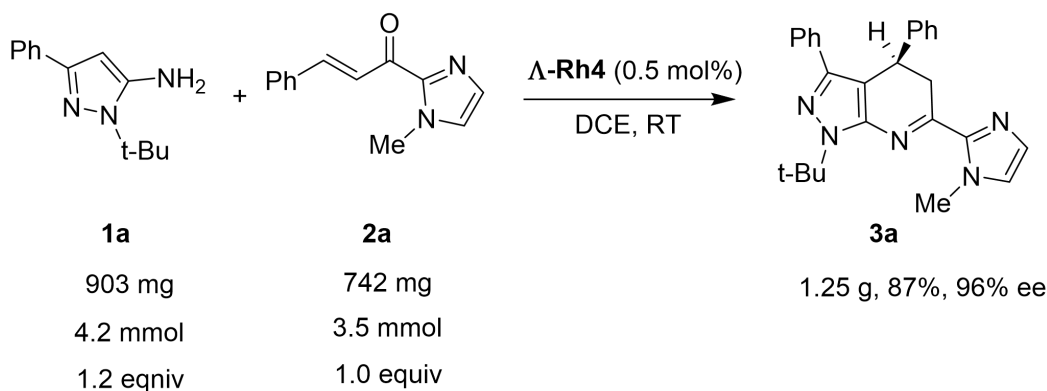

To an oven-dried 25 mL Schlenk tube equipped with a stir bar,  $\Lambda\text{-Rh4}$  (0.5 mol%) was added along with  $\alpha,\beta$ -unsaturated 2-acyl imidazole **2a** (1.0 equiv, 3.5 mmol, 742 mg) and pyrazol-amine **1a** (1.2 equiv, 4.2 mmol, 903 mg) in DCE (3.0 mL). The reaction was stirring at room temperature until consumption of the 2-acyl imidazole **2a** (monitored by TLC). The solution was directly purified by silica gel column chromatography (PE/EtOAc=3:1) to afford **3a** (light yellow solid, 1.25 g, 87% yield, 96% ee).

#### 5. General procedure for synthetic transformation of the product **6a**.

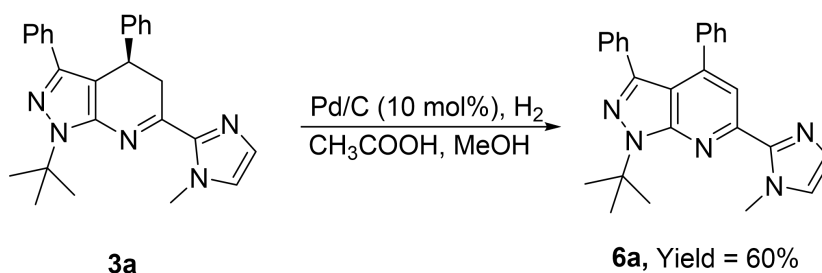

To an oven-dried 250 mL round bottom flask equipped, **3a** (0.2 mmol) was added along with Pd/C (10 mol%) and CH<sub>3</sub>COOH in MeOH (20 ml). Use H<sub>2</sub> to displace the air in the round bottom flask three times, then the reaction was stirring at 50 °C until consumption of the **3a** (monitored by TLC). The solution was directly purified by silica gel column chromatography (PE/EtOAc=4:1) to afford **6a** (49 mg, 60% yield).

#### 6. Characterization data of product.

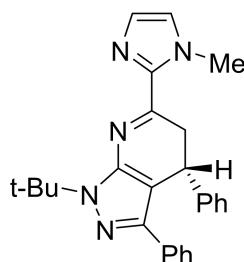

**(R)**-1-(tert-butyl)-6-(1-methyl-1H-imidazol-2-yl)-3,4-diphenyl-4,5-dihydro-1H-pyrazolo[3,4-b]pyridine (**3a**). Light yellow solid (39 mg, 95% yield). Mp: 150.9-152.4 °C. HPLC: 96% ee (Chiralpak IC column, 254 nm, hexane/isopropanol = 95:5, flow rate 1.0 mL/min, tr (major) = 8.533 min, tr (minor) = 9.967 min.  $[\alpha]_{\text{D}}^{20} = +17.0$  (c = 0.2, CH<sub>2</sub>Cl<sub>2</sub>). <sup>1</sup>H NMR (400 MHz, CDCl<sub>3</sub>)  $\delta = 7.50\text{-}7.45$  (m, 2H), 7.21-7.17 (m, 2H), 7.17-7.14 (m, 1H), 7.14-7.12 (m, 1H), 7.12-7.10 (m, 1H), 7.08-7.02 (m, 3H), 7.01 (d,  $J = 0.92$  Hz, 1H), 6.90-6.87 (m, 1H), 4.41-4.35 (m, 1H), 4.04 (s, 3H), 3.93-3.85 (m, 1H), 3.08-3.00 (m, 1H), 1.77 (s, 9H). <sup>13</sup>C NMR (100 MHz, CDCl<sub>3</sub>)  $\delta = 156.5, 146.7, 144.2, 143.6, 142.7, 134.0, 128.8, 128.7, 128.4, 127.2, 127.0, 126.6, 126.5, 126.1, 104.8, 59.9, 37.4, 34.8, 34.2, 29.9$ . HRMS (APCI) m/z calcd for C<sub>26</sub>H<sub>28</sub>N<sub>5</sub><sup>+</sup> (M+H)<sup>+</sup> 410.2339, found 410.2333.

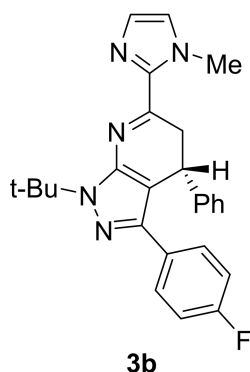

**(R)-1-(tert-butyl)-3-(4-fluorophenyl)-6-(1-methyl-1H-imidazol-2-yl)-4-phenyl-4,5-dihydro-1H-pyrazolo[3,4-b]pyridine (3b).** Light yellow solid (40 mg, 93% yield). Mp: 165.2-167.7 °C. HPLC: 94% ee (Chiralpak IC column, 254 nm, hexane/isopropanol = 95:5, flow rate 1.0 mL/min, tr (major) = 7.485 min, tr (minor) = 8.358 min.  $[\alpha]_D^{20} = +42.5$  (c = 0.2, CH<sub>2</sub>Cl<sub>2</sub>). <sup>1</sup>H NMR (400 MHz, CDCl<sub>3</sub>) δ = 7.54-7.45 (m, 2H), 7.23-7.16 (m, 2H), 7.15-7.11 (m, 1H), 7.08 (d, *J* = 8.44 Hz, 3H), 6.97-6.88 (m, 3H), 4.40 (d, *J* = 7.84 Hz, 1H), 4.09 (s, 3H), 3.94 (d, *J* = 16.28 Hz, 1H), 3.20-3.06 (m, 1H), 1.83 (s, 9H). <sup>13</sup>C NMR (100 MHz, CDCl<sub>3</sub>) δ = 163.3, 160.9, 156.6, 146.7, 144.1, 142.8, 142.6, 130.2, 128.9, 128.7, 128.2, 128.1, 127.2, 126.8, 126.2, 115.3, 115.1, 104.6, 59.9, 37.4, 34.8, 34.2, 29.9. <sup>19</sup>F NMR (376 MHz, CDCl<sub>3</sub>) δ = 115.3. HRMS (APCI) *m/z* calcd for C<sub>26</sub>H<sub>27</sub>FN<sub>5</sub><sup>+</sup> (M+H)<sup>+</sup> 428.2245, found 428.2239.

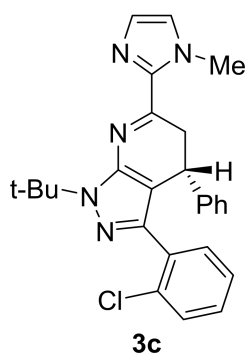

**(R)-1-(tert-butyl)-3-(2-chlorophenyl)-6-(1-methyl-1H-imidazol-2-yl)-4-phenyl-4,5-dihydro-1H-pyrazolo[3,4-b]pyridine (3c)** Light yellow solid (42 mg, 95% yield). Mp: 72.1-73.8 °C. HPLC: 99% ee (Chiralpak IC column, 254 nm, hexane/isopropanol = 95:5, flow rate 1.0 mL/min, tr (major) = 11.140 min, tr (minor) = 16.680 min.  $[\alpha]_D^{20} = +13.0$  (c = 0.2, CH<sub>2</sub>Cl<sub>2</sub>). <sup>1</sup>H NMR (400 MHz, CDCl<sub>3</sub>) δ = 7.16-7.10 (m, 2H),

7.07-7.02 (m, 1H), 7.02-6.98 (m, 2H), 6.98-6.95 (m, 1H), 6.94 (s, 1H), 6.93-6.87 (m, 4H), 4.21 (t,  $J = 7.92$  Hz, 1H), 4.06 (s, 3H), 3.37 (d,  $J = 7.96$  Hz, 2H), 1.74 (s, 9H).  $^{13}\text{C}$  NMR (100 MHz,  $\text{CDCl}_3$ )  $\delta = 157.2, 145.7, 144.1, 143.0, 142.7, 133.5, 133.4, 131.7, 129.4, 128.9, 128.7, 128.0, 127.4, 126.3, 126.2, 107.4, 59.8, 37.5, 35.4, 34.7, 30.0$ . HRMS (APCI)  $m/z$  calcd for  $\text{C}_{26}\text{H}_{27}\text{ClN}_5^+$  ( $\text{M}+\text{H}$ ) $^+$  444.1950, found 444.1942.

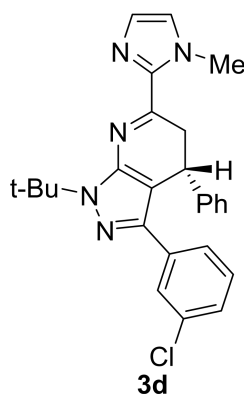

**(R)-1-(tert-butyl)-3-(3-chlorophenyl)-6-(1-methyl-1H-imidazol-2-yl)-4-phenyl-4,5-dihydro-1H-pyrazolo[3,4-b]pyridine (3d).** Light yellow solid (43 mg, 96% yield). Mp: 78.0-81.1 °C. HPLC: 99% ee (Chiralpak IC column, 254 nm, hexane/isopropanol = 95:5, flow rate 1.0 mL/min,  $t_r$  (major) = 7.532 min,  $t_r$  (minor) = 8.182 min.  $[\alpha]_{\text{D}}^{20} = +32.5$  ( $c = 0.2, \text{CH}_2\text{Cl}_2$ ).  $^1\text{H}$  NMR (400 MHz,  $\text{CDCl}_3$ )  $\delta = 7.62$  (s, 1H), 7.37-7.30 (m, 1H), 7.26-7.16 (m, 2H), 7.16-7.05 (m, 6H), 6.94 (s, 1H), 4.45-4.39 (m, 1H), 4.09 (s, 3H), 3.93 (d,  $J = 16.28$  Hz, 1H), 3.23-3.07 (m, 1H), 1.83 (s, 9H).  $^{13}\text{C}$  NMR (100 MHz,  $\text{CDCl}_3$ )  $\delta = 156.7, 146.8, 144.1, 142.5, 142.3, 135.8, 134.3, 129.6, 128.9, 128.8, 127.2, 127.0, 126.8, 126.5, 126.2, 124.5, 105.2, 60.1, 37.4, 34.8, 34.3, 29.9$ . HRMS (APCI)  $m/z$  calcd for  $\text{C}_{26}\text{H}_{27}\text{ClN}_5^+$  ( $\text{M}+\text{H}$ ) $^+$  444.1950, found 444.1942.

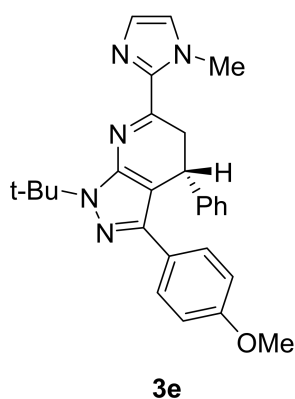

**(R)-1-(tert-butyl)-3-(4-methoxyphenyl)-6-(1-methyl-1H-imidazol-2-yl)-4-phenyl-4,5-dihydro-1H-pyrazolo[3,4-b]pyridine (3e).** White solid (38 mg, 87% yield). Mp: 85.1-87.6 °C. HPLC: 85% ee (Chiralpak IC column, 254 nm, hexane/isopropanol = 95:5, flow rate 1.0 mL/min, tr (major) = 12.840 min, tr (minor) = 19.261 min.  $[\alpha]_D^{20} = +22.5$  (c = 0.2, CH<sub>2</sub>Cl<sub>2</sub>). <sup>1</sup>H NMR (400 MHz, CDCl<sub>3</sub>)  $\delta = 7.47$  (d, *J* = 8.8 Hz, 2H), 7.23-7.16 (m, 2H), 7.15-7.05 (m, 4H), 6.94 (s, 1H), 6.82-6.76 (m, 2H), 4.44-4.38 (m, 1H), 4.09 (s, 3H), 3.96 (d, *J* = 17.16 Hz, 1H), 3.75 (s, 3H), 3.16-3.05 (m, 1H), 1.83 (s, 9H). <sup>13</sup>C NMR (100 MHz, CDCl<sub>3</sub>)  $\delta = 158.8, 156.4, 146.4, 144.3, 143.5, 142.8, 128.8, 128.7, 127.7, 127.2, 126.8, 126.6, 126.1, 113.8, 104.2, 59.7, 55.2, 37.4, 34.8, 34.1, 29.9$ . HRMS (APCI) *m/z* calcd for C<sub>27</sub>H<sub>30</sub>N<sub>5</sub>O<sup>+</sup> (M+H)<sup>+</sup> 440.2445, found 440.2437.

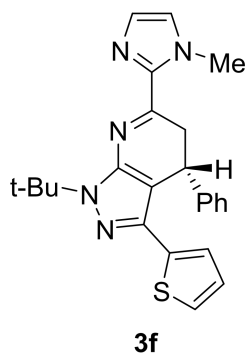

**(R)-1-(tert-butyl)-6-(1-methyl-1H-imidazol-2-yl)-4-phenyl-3-(thiophen-2-yl)-4,5-dihydro-1H-pyrazolo[3,4-b]pyridine (3f).** Light yellow solid (38 mg, 92% yield). Mp: 170.1-173.5 °C. HPLC: 95% ee (Chiralpak IC column, 254 nm, hexane/isopropanol = 95:5, flow rate 1.0 mL/min, tr (major) = 9.375 min, tr (minor) = 11.132 min.  $[\alpha]_D^{20} = -36.0$  (c = 0.2, CH<sub>2</sub>Cl<sub>2</sub>). <sup>1</sup>H NMR (400 MHz, CDCl<sub>3</sub>)  $\delta = 7.23$ -7.16 (m, 2H), 7.15-7.06 (m, 5H), 6.95 (s, 1H), 6.91-6.84 (m, 2H), 4.43 (dd, *J* = 9.5, 2.1 Hz, 1H), 4.08 (s, 3H), 4.04-3.93 (m, 1H), 3.19 (d, *J* = 12.8 Hz, 1H), 1.81 (s, 9H). <sup>13</sup>C NMR (100 MHz, CDCl<sub>3</sub>)  $\delta = 156.6, 146.6, 144.0, 142.4, 139.6, 136.7, 128.7, 127.3, 127.2, 126.7, 126.3, 124.0, 123.8, 104.2, 60.0, 37.5, 34.6, 33.8, 29.8$ . HRMS (APCI) *m/z* calcd for C<sub>24</sub>H<sub>26</sub>N<sub>5</sub>S<sup>+</sup> (M+H)<sup>+</sup> 416.1903, found 416.1898.

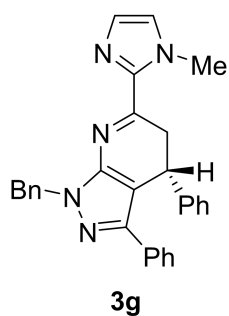

**(R)-1-benzyl-6-(1-methyl-1H-imidazol-2-yl)-3,4-diphenyl-4,5-dihydro-1H-pyrazolo[3,4-b]pyridine (3g).** Light yellow solid (38 mg, 85% yield). Mp: 88.2-89.8 °C.

HPLC: 87% ee (Chiralpak IC column, 254 nm, hexane/isopropanol = 80:20, flow rate 1.0 mL/min, tr (major) = 7.743 min, tr (minor) = 9.378 min.  $[\alpha]_D^{20} = +24.0$  (c = 0.2, CH<sub>2</sub>Cl<sub>2</sub>). <sup>1</sup>H NMR (400 MHz, CDCl<sub>3</sub>)  $\delta$  = 7.58-7.53 (m, 2H), 7.32 (d,  $J = 4.36$  Hz, 4H), 7.29-7.23 (m, 3H), 7.23-7.16 (m, 3H), 7.15-7.09 (m, 3H), 7.06 (s, 1H), 6.91 (s, 1H), 5.65-5.52 (m, 2H), 4.53-4.48 (m, 1H), 3.98-3.90 (m, 1H), 3.94 (s, 3H), 3.21-3.11 (m, 1H). <sup>13</sup>C NMR (100 MHz, CDCl<sub>3</sub>)  $\delta$  = 158.7, 147.1, 146.6, 143.7, 142.8, 137.7, 133.5, 129.0, 128.8, 128.7, 128.4, 127.6, 127.4, 127.2, 126.8, 126.6, 126.4, 103.5, 51.7, 37.3, 35.3, 34.6. HRMS (APCI) m/z calcd for C<sub>29</sub>H<sub>26</sub>N<sub>5</sub><sup>+</sup> (M+H)<sup>+</sup> 444.2183, found 444.2174.

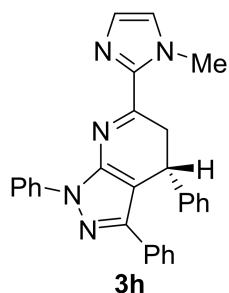

**(R)-6-(1-methyl-1H-imidazol-2-yl)-1,3,4-triphenyl-4,5-dihydro-1H-pyrazolo[3,4-b]pyridine (3h).** Light yellow solid (40 mg, 92% yield). Mp: 221.3-225.1 °C. HPLC: 97% ee (Chiralpak IC column, 254 nm, hexane/isopropanol = 80:20, flow rate 0.7 mL/min, tr (major) = 14.200 min, tr (minor) = 14.763 min.  $[\alpha]_D^{20} = +32.0$  (c = 0.2, CH<sub>2</sub>Cl<sub>2</sub>). <sup>1</sup>H NMR (400 MHz, CDCl<sub>3</sub>)  $\delta$  = 8.05-7.95 (m, 2H), 7.68-7.60 (m, 2H), 7.53-7.43 (m, 2H), 7.36-7.13 (m, 9H), 7.09 (d,  $J = 1.0$  Hz, 1H), 6.95 (s, 1H), 4.56 (dd,  $J = 9.3, 2.2$  Hz, 1H), 4.08-4.00 (m, 1H), 4.00 (s, 3H), 3.20 (dd,  $J = 17.2, 9.3$  Hz, 1H).

$^{13}\text{C}$  NMR (100 MHz,  $\text{CDCl}_3$ )  $\delta$  = 159.3, 147.7, 147.2, 143.8, 142.3, 139.3, 133.2, 129.2, 128.9, 128.8, 128.5, 127.9, 127.2, 126.9, 126.7, 123.1, 105.2, 37.4, 34.9, 34.4. HRMS (APCI)  $m/z$  calcd for  $\text{C}_{28}\text{H}_{24}\text{N}_5^+$  ( $\text{M}+\text{H}$ ) $^+$  430.2026, found 430.2020.

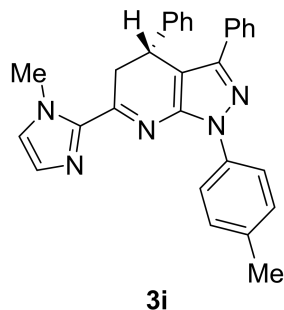

**(R)-6-(1-methyl-1H-imidazol-2-yl)-3,4-diphenyl-1-(p-tolyl)-4,5-dihydro-1H-pyrazolo[3,4-b]pyridine (3i).** Light yellow solid (41 mg, 93% yield). Mp: 199.8-201.4 °C. HPLC: 98% ee (Chiralpak IC column, 254 nm, hexane/isopropanol = 80:20, flow rate 0.7 mL/min, tr (major) = 16.777 min, tr (minor) = 17.488 min.  $[\alpha]_{\text{D}}^{20}$  = +28.0 (c = 0.2,  $\text{CH}_2\text{Cl}_2$ ).  $^1\text{H}$  NMR (400 MHz,  $\text{CDCl}_3$ )  $\delta$  = 7.82-7.75 (m, 2H), 7.59-7.53 (m, 2H), 7.23-7.05 (m, 10H), 7.02 (s, 1H), 6.87 (s, 1H), 4.47 (dd,  $J$  = 9.4, 2.2 Hz, 1H), 3.99-3.89 (m, 4H), 3.12 (dd,  $J$  = 17.2, 9.3 Hz, 1H), 2.34 (s, 3H).  $^{13}\text{C}$  NMR (100 MHz,  $\text{CDCl}_3$ )  $\delta$  = 159.1, 147.5, 147.1, 143.9, 142.5, 136.9, 136.6, 133.3, 129.4, 129.2, 128.9, 128.6, 127.8, 127.3, 126.9, 126.7, 123.1, 105.1, 37.5, 34.9, 34.4, 21.2. HRMS (APCI)  $m/z$  calcd for  $\text{C}_{29}\text{H}_{26}\text{N}_5^+$  ( $\text{M}+\text{H}$ ) $^+$  444.2183, found 444.2176.

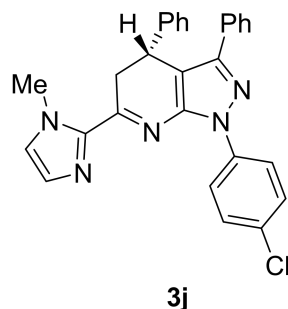

**(R)-1-(4-chlorophenyl)-6-(1-methyl-1H-imidazol-2-yl)-3,4-diphenyl-4,5-dihydro-1H-pyrazolo[3,4-b]pyridine (3j).** Light yellow solid (42 mg, 91% yield). Mp: 137.6-139.8 °C. HPLC: 97% ee (Chiralpak IC column, 254 nm, hexane/isopropanol = 80:20, flow rate 0.7 mL/min, tr (major) = 12.418 min, tr (minor) = 13.095 min.  $[\alpha]_{\text{D}}^{20}$  = +32.0 (c = 0.2,  $\text{CH}_2\text{Cl}_2$ ).  $^1\text{H}$  NMR (400 MHz,  $\text{CDCl}_3$ )  $\delta$  = 8.02-7.93 (m, 2H),

7.65-7.58 (m, 2H), 7.49-7.41 (m, 2H), 7.32-7.20 (m, 5H), 7.18-7.11 (m, 3H), 7.10 (d,  $J = 1.0$  Hz, 1H), 6.97 (s, 1H), 4.54 (dd,  $J = 9.4, 2.2$  Hz, 1H), 4.09-3.95 (m, 1H), 4.01 (s, 3H), 3.20 (dd,  $J = 17.2, 9.4$  Hz, 1H).  $^{13}\text{C}$  NMR (100 MHz,  $\text{CDCl}_3$ )  $\delta = 159.6, 148.0, 147.2, 143.7, 142.2, 137.8, 132.9, 132.1, 129.3, 128.9, 128.6, 128.0, 127.2, 127.0, 126.8, 124.0, 105.5, 37.4, 34.9, 34.3$ . HRMS (APCI)  $m/z$  calcd for  $\text{C}_{28}\text{H}_{23}\text{ClN}_5^+$  ( $\text{M}+\text{H}$ ) $^+$  464.1637, found 464.1631.

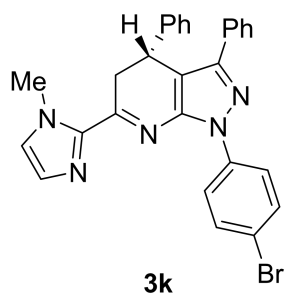

**(*R*)-1-(4-bromophenyl)-6-(1-methyl-1H-imidazol-2-yl)-3,4-diphenyl-4,5-dihydro-1H-pyrazolo[3,4-b]pyridine (3k)**. Light yellow solid (48 mg, 94% yield). Mp: 227.9-230.7 °C. HPLC: 99% ee (Chiralpak IC column, 254 nm, hexane/isopropanol = 80:20, flow rate 0.7 mL/min,  $t_r$  (major) = 12.812 min,  $t_r$  (minor) = 13.648 min.  $[\alpha]_{\text{D}}^{20} = +42.0$  ( $c = 0.2, \text{CH}_2\text{Cl}_2$ ).  $^1\text{H}$  NMR (400 MHz,  $\text{CDCl}_3$ )  $\delta = 7.99-7.87$  (m, 2H), 7.68-7.55 (m, 4H), 7.31-7.20 (m, 5H), 7.16 (d,  $J = 7.3$  Hz, 2H), 7.11 (d,  $J = 1.0$  Hz, 1H), 6.98 (s, 1H), 4.54 (dd,  $J = 9.4, 2.2$  Hz, 1H), 4.10-3.99 (m, 4H), 3.20 (dd,  $J = 17.2, 9.3$  Hz, 1H).  $^{13}\text{C}$  NMR (100 MHz,  $\text{CDCl}_3$ )  $\delta = 159.6, 148.0, 147.2, 143.6, 142.1, 138.3, 132.9, 131.8, 129.3, 128.9, 128.6, 128.0, 127.2, 127.0, 126.9, 126.8, 124.3, 120.0, 105.6, 37.4, 34.9, 34.3$ . HRMS (APCI)  $m/z$  calcd for  $\text{C}_{28}\text{H}_{23}\text{BrN}_5^+$  ( $\text{M}+\text{H}$ ) $^+$  508.1131, found 508.1125.

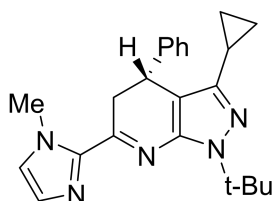

**(*R*)-1-(tert-butyl)-3-cyclopropyl-6-(1-methyl-1H-imidazol-2-yl)-4-phenyl-4,5-dihydro-1H-pyrazolo[3,4-b]pyridine (3l)**. Light yellow solid (35 mg, 95% yield). Mp:



178.2-180.6 °C. HPLC: 99% ee (Chiralpak IC column, 254 nm, hexane/isopropanol = 95:5, flow rate 1.0 mL/min, tr (major) = 6.179 min, tr (minor) = 6.488 min.  $[\alpha]_D^{20} = +36.0$  (c = 0.2, CH<sub>2</sub>Cl<sub>2</sub>). <sup>1</sup>H NMR (400 MHz, CDCl<sub>3</sub>) δ = 7.25-7.19 (m, 2H), 7.18-7.12 (m, 3H), 7.08 (s, 1H), 6.96 (s, 1H), 4.20 (dd, *J* = 8.9, 5.9 Hz, 1H), 4.09 (s, 3H), 3.56 (dd, *J* = 17.3, 5.9 Hz, 1H), 3.31 (dd, *J* = 17.3, 8.9 Hz, 1H), 1.72 (s, 9H). <sup>13</sup>C NMR (100 MHz, CDCl<sub>3</sub>) δ = 156.2, 146.1, 145.7, 144.3, 143.7, 128.7, 128.5, 127.4, 126.5, 126.0, 105.4, 59.2, 37.5, 34.4, 29.9, 8.5, 6.5, 6.1. HRMS (APCI) *m/z* calcd for C<sub>23</sub>H<sub>28</sub>N<sub>5</sub><sup>+</sup> (M+H)<sup>+</sup> 374.2339, found 374.2332.

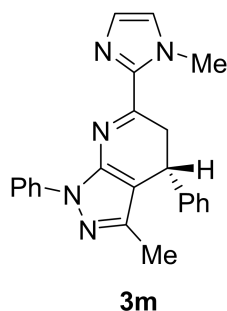

**(R)-3-methyl-6-(1-methyl-1H-imidazol-2-yl)-1,4-diphenyl-4,5-dihydro-1H-pyrazolo[3,4-b]pyridine (3m).** Light yellow solid (35 mg, 95% yield). Mp: 120.8-122.1 °C. HPLC: 99% ee (Chiralpak IC column, 254 nm, hexane/isopropanol = 95:5, flow rate 1.0 mL/min, tr (major) = 14.998 min, tr (minor) = 15.779 min.  $[\alpha]_D^{20} = +42.0$  (c = 0.2, CH<sub>2</sub>Cl<sub>2</sub>). <sup>1</sup>H NMR (400 MHz, CDCl<sub>3</sub>) δ = 7.90-7.81 (m, 2H), 7.42 (t, *J* = 7.9 Hz, 2H), 7.28-7.23 (m, 3H), 7.21-7.15 (m, 3H), 7.08 (s, 1H), 6.93 (s, 1H), 4.22 (t, *J* = 8.0 Hz, 1H), 3.97 (s, 3H), 3.58-3.42 (m, 2H), 2.02 (s, 3H). <sup>13</sup>C NMR (100 MHz, CDCl<sub>3</sub>) δ = 159.2, 146.1, 143.7, 143.0, 139.2, 129.4, 129.0, 128.7, 127.4, 126.9, 126.6, 126.3, 122.6, 106.4, 37.4, 34.7, 12.7. HRMS (APCI) *m/z* calcd for C<sub>23</sub>H<sub>22</sub>N<sub>5</sub><sup>+</sup> (M+H)<sup>+</sup> 368.1870, found 368.1863.

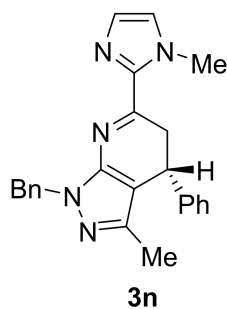

**(R)-1-(tert-butyl)-3-cyclopropyl-6-(1-methyl-1H-imidazol-2-yl)-4-phenyl-4,5-dihydro-1H-pyrazolo[3,4-b]pyridine (3n).** Light yellow solid (31 mg, 81% yield). Mp: 129.6-131.9 °C. HPLC: 85% ee (Chiralpak IC column, 254 nm, hexane/isopropanol = 80:20, flow rate 0.7 mL/min, tr (major) = 14.451 min, tr (minor) = 15.792 min.  $[\alpha]_D^{20} = +38.0$  (c = 0.2, CH<sub>2</sub>Cl<sub>2</sub>). <sup>1</sup>H NMR (400 MHz, CDCl<sub>3</sub>) δ = 7.33-7.23 (m, 7H), 7.20-7.13 (m, 3H), 7.09 (s, 1H), 6.95 (s, 1H), 5.43 (d, *J* = 4.0 Hz, 2H), 4.20 (t, *J* = 8.0 Hz, 1H), 3.97 (s, 3H), 3.45 (d, *J* = 7.5 Hz, 2H), 1.94 (s, 3H). <sup>13</sup>C NMR (100 MHz, CDCl<sub>3</sub>) δ = 158.8, 146.2, 144.7, 143.7, 143.4, 137.8, 128.9, 128.7, 128.6, 127.6, 127.3, 126.7, 126.4, 104.4, 51.2, 37.4, 35.1, 34.8, 12.7. HRMS (APCI) *m/z* calcd for C<sub>24</sub>H<sub>24</sub>N<sub>5</sub><sup>+</sup> (M+H)<sup>+</sup> 382.2026, found 382.2020.

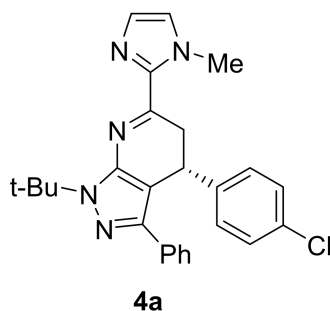

**(R)-1-(tert-butyl)-4-(4-chlorophenyl)-6-(1-methyl-1H-imidazol-2-yl)-3-phenyl-4,5-dihydro-1H-pyrazolo[3,4-b]pyridine (4a).** Light yellow solid (42 mg, 95% yield). Mp: 76.5-78.1 °C. HPLC: 98% ee (Chiralpak IC column, 254 nm, hexane/isopropanol = 95:5, flow rate 1.0 mL/min, tr (major) = 7.884 min, tr (minor) = 8.422 min.  $[\alpha]_D^{20} = +38.0$  (c = 0.2, CH<sub>2</sub>Cl<sub>2</sub>). <sup>1</sup>H NMR (400 MHz, CDCl<sub>3</sub>) δ = 7.56-7.50 (m, 2H), 7.29-7.23 (m, 2H), 7.22-7.18 (m, 1H), 7.18-7.16 (m, 1H), 7.16-7.14 (m, 1H), 7.09 (s, 1H), 7.06-7.00 (m, 2H), 6.95 (s, 1H), 4.45-4.40 (m, 1H), 4.09 (s, 3H), 3.94 (d, *J* = 16.96 Hz, 1H), 3.15-3.03 (m, 1H), 1.83 (s, 9H). <sup>13</sup>C NMR (100 MHz, CDCl<sub>3</sub>) δ = 156.3, 146.6, 144.1, 143.6, 141.2, 133.8, 132.4, 129.0, 128.9, 128.6, 128.5, 127.2, 126.4, 126.3, 104.4, 60.0, 37.4, 34.7, 33.6, 29.9. HRMS (APCI) *m/z* calcd for C<sub>26</sub>H<sub>27</sub>ClN<sub>5</sub> (M+H)<sup>+</sup> 444.1950, found 444.1942.

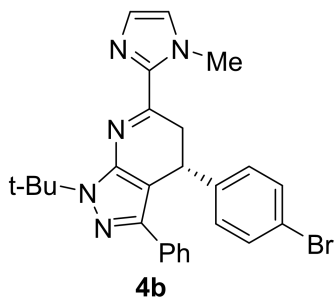

**(R)-4-(4-bromophenyl)-1-(tert-butyl)-6-(1-methyl-1H-imidazol-2-yl)-3-phenyl-4,5-dihydro-1H-pyrazolo[3,4-b]pyridine (4b).** Light yellow solid (47 mg, 96% yield). Mp: 78.7-80.3 °C. HPLC: 99% ee (Chiralpak IC column, 254 nm, hexane/isopropanol = 95:5, flow rate 1.0 mL/min, tr (major) = 7.374 min, tr (minor) = 7.784 min.  $[\alpha]_{\text{D}}^{20} = +34.5$  (c = 0.2, CH<sub>2</sub>Cl<sub>2</sub>). <sup>1</sup>H NMR (400 MHz, CDCl<sub>3</sub>) δ = 7.45 (d, *J* = 7.64 Hz, 2H), 7.26-7.21 (m, 2H), 7.21-7.15 (m, 2H), 7.14-7.08 (m, 1H), 7.00 (s, 1H), 6.90 (s, 1H), 6.88 (d, *J* = 5.28 Hz, 2H), 4.33 (d, *J* = 8.04 Hz, 1H), 4.01 (s, 3H), 3.87 (d, *J* = 16.92 Hz, 1H), 3.06-2.94 (m, 1H), 1.75 (s, 9H). <sup>13</sup>C NMR (100 MHz, CDCl<sub>3</sub>) δ = 156.3, 146.6, 144.0, 143.6, 141.7, 133.8, 131.8, 129.0, 128.5, 127.2, 126.4, 120.5, 104.3, 60.0, 37.5, 34.6, 33.7, 29.9. HRMS (APCI) *m/z* calcd for C<sub>26</sub>H<sub>27</sub>BrN<sub>5</sub><sup>+</sup> (M+H)<sup>+</sup> 488.1444, found 488.1438, 490.1417.

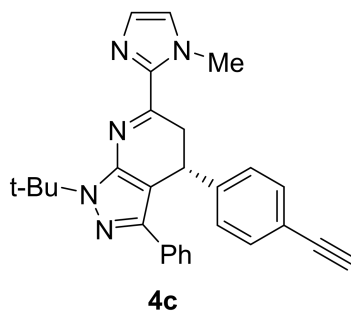

**(R)-1-(tert-butyl)-4-(4-ethynylphenyl)-6-(1-methyl-1H-imidazol-2-yl)-3-phenyl-4,5-dihydro-1H-pyrazolo[3,4-b]pyridine (4c).** Light yellow solid (42 mg, 95% yield). Mp: 92.2-94.1 °C. HPLC: 97% ee (Chiralpak IC column, 254 nm, hexane/isopropanol = 95:5, flow rate 1.0 mL/min, tr (major) = 8.095 min, tr (minor) = 8.768 min.  $[\alpha]_{\text{D}}^{20} = +36.0$  (c = 0.2, CH<sub>2</sub>Cl<sub>2</sub>). <sup>1</sup>H NMR (400 MHz, CDCl<sub>3</sub>) δ = 7.53-7.50 (m, 2H), 7.35-7.31 (m, 2H), 7.28-7.22 (m, 2H), 7.22-7.16 (m, 1H), 7.10-7.03 (m, 3H), 6.95 (s, 1H), 4.47-4.41 (m, 1H), 4.09 (s, 3H), 3.95 (d, *J* = 16.96 Hz, 1H), 3.15-3.05 (m, 1H),

2.98 (s, 1H), 1.84 (s, 9H).  $^{13}\text{C}$  NMR (100 MHz,  $\text{CDCl}_3$ )  $\delta$  = 156.3, 146.7, 144.0, 143.7, 143.6, 133.8, 132.6, 128.9, 128.4, 127.3, 127.2, 126.4, 126.3, 120.4, 104.2, 83.6, 77.0, 60.0, 37.4, 34.6, 34.1, 29.9. HRMS (APCI)  $m/z$  calcd for  $\text{C}_{28}\text{H}_{28}\text{N}_5^+$  ( $\text{M}+\text{H}$ ) $^+$  434.2339, found 434.2332.

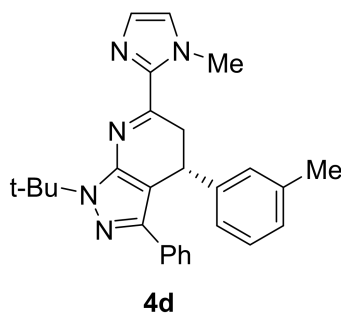

**(R)-1-(tert-butyl)-6-(1-methyl-1H-imidazol-2-yl)-3-phenyl-4-(m-tolyl)-4,5-dihydro-1H-pyrazolo[3,4-b]pyridine (4d).** Light yellow solid (39 mg, 93% yield). Mp: 154.3-156.9 °C. HPLC: 96% ee (Chiralpak IC column, 254 nm, hexane/isopropanol = 95:5, flow rate 1.0 mL/min, tr (major) = 7.464 min, tr (minor) = 7.918 min.  $[\alpha]_{\text{D}}^{20}$  = +32.0 (c = 0.2,  $\text{CH}_2\text{Cl}_2$ ).  $^1\text{H}$  NMR (400 MHz,  $\text{CDCl}_3$ )  $\delta$  = 7.35 -7.30 (m, 2H), 7.17 -7.07 (m, 4H), 6.98-6.92 (m, 2H), 6.87-6.81 (m, 2H), 6.65-6.59 (m, 1H), 4.55-4.47 (m, 1H), 4.01 (s, 3H), 3.66 (d,  $J$  = 16.88 Hz, 1H), 3.09-2.95 (m, 1H), 2.44 (s, 3H), 1.77 (s, 9H).  $^{13}\text{C}$  NMR (100 MHz,  $\text{CDCl}_3$ )  $\delta$  = 156.4, 147.2, 144.3, 143.4, 140.6, 134.6, 133.9, 130.9, 128.7, 128.4, 127.0, 126.6, 126.3, 126.1, 105.1, 59.9, 37.4, 33.2, 30.1, 29.9, 19.6. HRMS (APCI)  $m/z$  calcd for  $\text{C}_{27}\text{H}_{30}\text{N}_5^+$  ( $\text{M}+\text{H}$ ) $^+$  424.2496, found 424.2488.

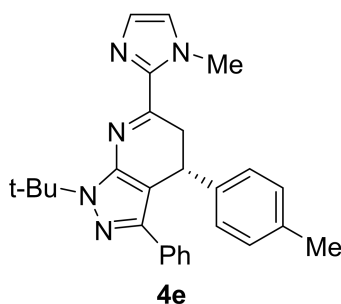

**(R)-1-(tert-butyl)-6-(1-methyl-1H-imidazol-2-yl)-3-phenyl-4-(p-tolyl)-4,5-dihydro-1H-pyrazolo[3,4-b]pyridine (4e).** Light yellow solid (39 mg, 92% yield). Mp: 107.4-109.2 °C. HPLC: 94% ee (Chiralpak IC column, 254 nm, hexane/isopropanol = 95:5, flow rate 1.0 mL/min, tr (major) = 7.405 min, tr (minor) = 8.224 min.  $[\alpha]_{\text{D}}^{20}$  =

-38.5 (c = 0.2, CH<sub>2</sub>Cl<sub>2</sub>). <sup>1</sup>H NMR (400 MHz, CDCl<sub>3</sub>) δ = 7.59-7.54 (m, 2H), 7.28-7.22 (m, 2H), 7.21-7.15 (m, 1H), 7.07 (s, 1H), 6.99 (s, 4H), 6.93 (s, 1H), 4.44-4.39 (m, 1H), 4.08 (s, 3H), 3.98 (d, *J* = 16.72 Hz, 1H), 3.14-3.02 (m, 1H), 2.23 (s, 3H), 1.83 (s, 9H). <sup>13</sup>C NMR (100 MHz, CDCl<sub>3</sub>) δ = 156.5, 146.6, 144.2, 143.6, 139.6, 136.1, 134.0, 129.4, 128.7, 128.4, 127.1, 127.0, 126.5, 126.1, 105.1, 59.8, 37.4, 34.9, 33.7, 29.9, 21.0. HRMS (APCI) *m/z* calcd for C<sub>27</sub>H<sub>30</sub>N<sub>5</sub><sup>+</sup> (M+H)<sup>+</sup> 424.2496, found 424.2486.

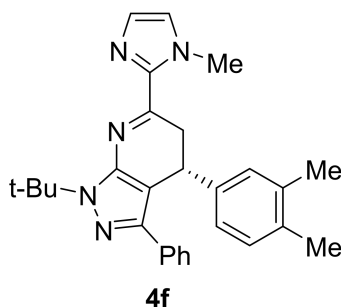

**(*R*)-1-(tert-butyl)-4-(3,4-dimethylphenyl)-6-(1-methyl-1H-imidazol-2-yl)-3-phenyl-4,5-dihydro-1H-pyrazolo[3,4-b]pyridine (4f).** Light yellow solid (39 mg, 90% yield). Mp: 89.8-91.1 °C. HPLC: 92% ee (Chiralpak IC column, 254 nm, hexane/isopropanol = 95:5, flow rate 1.0 mL/min, *t<sub>r</sub>* (major) = 7.939 min, *t<sub>r</sub>* (minor) = 8.820 min. [ $\alpha$ ]<sub>D</sub><sup>20</sup> = +37.0 (c = 0.2, CH<sub>2</sub>Cl<sub>2</sub>). <sup>1</sup>H NMR (400 MHz, CDCl<sub>3</sub>) δ = 7.57 (d, *J* = 7.44 Hz, 2H), 7.29-7.21 (m, 2H), 7.21-7.14 (m, 1H), 7.07 (s, 1H), 6.95-6.85 (m, 3H), 6.78 (d, *J* = 7.56 Hz, 1H), 4.39 (d, *J* = 8.84 Hz, 1H), 4.07 (s, 3H), 3.95 (d, *J* = 16.76 Hz, 1H), 3.13-3.01 (m, 1H), 2.13 (s, 6H), 1.83 (s, 9H). <sup>13</sup>C NMR (100 MHz, CDCl<sub>3</sub>) δ = 156.6, 146.7, 144.3, 143.6, 140.0, 136.6, 134.7, 134.1, 129.8, 128.8, 128.5, 128.4, 127.0, 126.5, 126.0, 124.5, 105.1, 59.8, 37.4, 35.0, 33.6, 29.9, 20.0, 19.4. HRMS (APCI) *m/z* calcd for C<sub>28</sub>H<sub>32</sub>N<sub>5</sub><sup>+</sup> (M+H)<sup>+</sup> 438.2652, found 438.2645.

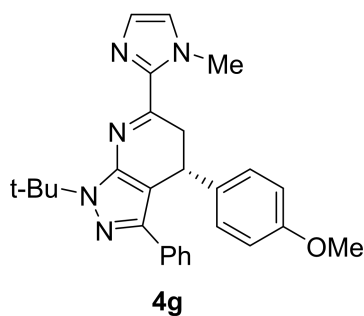

**(R)-1-(tert-butyl)-4-(4-methoxyphenyl)-6-(1-methyl-1H-imidazol-2-yl)-3-phenyl-4,5-dihydro-1H-pyrazolo[3,4-b]pyridine (4g).** Light yellow solid (39 mg, 88% yield). Mp: 74.5-76.7 °C. HPLC: 90% ee (Chiralpak IC column, 254 nm, hexane/isopropanol = 95:5, flow rate 1.0 mL/min, tr (major) = 10.717 min, tr (minor) = 11.685 min.  $[\alpha]_{\text{D}}^{20} = +29.0$  (c = 0.2, CH<sub>2</sub>Cl<sub>2</sub>). <sup>1</sup>H NMR (400 MHz, CDCl<sub>3</sub>) δ = 7.59-7.53 (m, 2H), 7.29-7.22 (m, 2H), 7.21-7.15 (m, 1H), 7.08 (s, 1H), 7.04-6.97 (m, 2H), 6.94 (s, 1H), 6.75-6.70 (m, 2H), 4.43-4.37 (m, 1H), 4.09 (s, 3H), 3.95 (d, *J* = 16.68 Hz, 1H), 3.70 (s, 3H), 3.15-3.00 (m, 1H), 1.83 (s, 9H). <sup>13</sup>C NMR (100 MHz, CDCl<sub>3</sub>) δ = 158.2, 156.5, 146.6, 144.3, 143.5, 134.7, 134.0, 128.8, 128.4, 128.2, 127.0, 126.5, 126.1, 114.0, 105.2, 59.9, 55.1, 37.4, 35.0, 33.3, 29.9. HRMS (APCI) *m/z* calcd for C<sub>27</sub>H<sub>30</sub>N<sub>5</sub>O<sup>+</sup> (M+H)<sup>+</sup> 440.2445, found 440.2438.

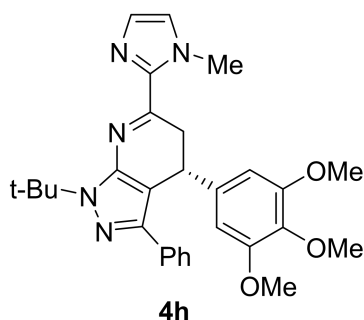

**(R)-1-(tert-butyl)-6-(1-methyl-1H-imidazol-2-yl)-3-phenyl-4-(3,4,5-trimethoxyphenyl)-4,5-dihydro-1H-pyrazolo[3,4-b]pyridine (4h).** Light yellow solid (43 mg, 86% yield). Mp: 61.4-63.4 °C. HPLC: 94% ee (Chiralpak IC column, 254 nm, hexane/isopropanol = 80:20, flow rate 1.0 mL/min, tr (major) = 10.686 min, tr (minor) = 12.092 min.  $[\alpha]_{\text{D}}^{20} = +28.5$  (c = 0.2, CH<sub>2</sub>Cl<sub>2</sub>). <sup>1</sup>H NMR (400 MHz, CDCl<sub>3</sub>) δ = 7.60 (d, *J* = 7.44 Hz, 2H), 7.33-7.25 (m, 2H), 7.25-7.18 (m, 1H), 7.13 (s, 1H), 6.99 (s, 1H), 6.34 (s, 2H), 4.45-4.29 (m, 1H), 4.11 (s, 3H), 3.98 (d, *J* = 16.84 Hz, 1H), 3.75 (s, 3H), 3.64 (s, 6H), 3.19-3.06 (m, 1H), 1.82 (s, 9H). <sup>13</sup>C NMR (100 MHz, CDCl<sub>3</sub>) δ = 156.7, 153.1, 146.4, 144.2, 143.8, 138.2, 136.4, 134.1, 128.9, 128.4, 127.2, 126.8, 126.3, 105.3, 104.1, 60.7, 59.9, 55.8, 37.4, 34.3, 29.8. HRMS (APCI) *m/z* calcd for C<sub>29</sub>H<sub>34</sub>N<sub>5</sub>O<sub>3</sub><sup>+</sup> (M+H)<sup>+</sup> 500.2656, found 500.2647.

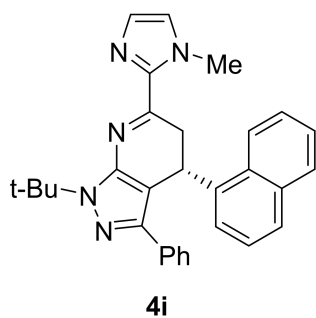

**(R)-1-(tert-butyl)-6-(1-methyl-1H-imidazol-2-yl)-4-(naphthalen-1-yl)-3-phenyl-4,5-dihydro-1H-pyrazolo[3,4-b]pyridine (4i).** Light yellow solid (38 mg, 82% yield). Mp: 221.4-222.3 °C. HPLC: 86% ee (Chiralpak IC column, 254 nm, hexane/isopropanol = 80:20, flow rate 0.7 mL/min, tr (major) = 7.318 min, tr (minor) = 8.171 min.  $[\alpha]_D^{20} = +32.5$  (c = 0.2, CH<sub>2</sub>Cl<sub>2</sub>). <sup>1</sup>H NMR (400 MHz, CDCl<sub>3</sub>) δ = 8.20 (d, *J* = 8.5 Hz, 1H), 7.75 (d, *J* = 8.3 Hz, 1H), 7.58-7.46 (m, 2H), 7.44-7.37 (m, 1H), 7.36-7.30 (m, 2H), 7.13-7.06 (m, 1H), 7.04-6.97 (m, 3H), 6.84-6.76 (m, 2H), 6.70 (s, 1H), 5.16 (d, *J* = 9.7 Hz, 1H), 3.99-3.94 (m, 1H), 3.94 (s, 3H), 3.16 (dd, *J* = 17.1, 9.8 Hz, 1H), 1.79 (s, 9H). <sup>13</sup>C NMR (100 MHz, CDCl<sub>3</sub>) δ = 147.4, 144.1, 143.5, 137.6, 134.5, 133.8, 130.5, 129.2, 128.7, 128.5, 127.6, 127.0, 126.6, 126.3, 126.1, 125.6, 125.5, 124.8, 123.2, 104.5, 60.0, 37.4, 33.7, 30.0, 29.7. HRMS (APCI) *m/z* calcd for C<sub>30</sub>H<sub>30</sub>N<sub>5</sub><sup>+</sup> (M+H)<sup>+</sup> 460.2496, found 460.2490.

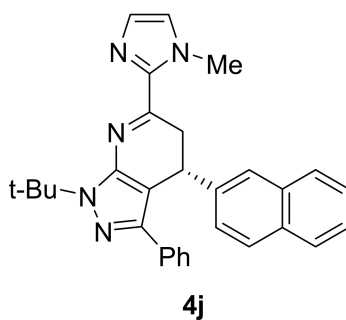

**(R)-1-(tert-butyl)-6-(1-methyl-1H-imidazol-2-yl)-4-(naphthalen-2-yl)-3-phenyl-4,5-dihydro-1H-pyrazolo[3,4-b]pyridine (4j).** Light yellow solid (44 mg, 96% yield). Mp: 93.7-95.7 °C. HPLC: 97% ee (Chiralpak IC column, 254 nm, hexane/isopropanol = 95:5, flow rate 1.0 mL/min, tr (major) = 9.927 min, tr (minor) = 10.904 min.  $[\alpha]_D^{20} = +45.7$  (c = 0.2, CH<sub>2</sub>Cl<sub>2</sub>). <sup>1</sup>H NMR (400 MHz, CDCl<sub>3</sub>) δ = 7.68-7.61 (m, 2H), 7.59-7.53 (m, 1H), 7.52-7.46 (m, 2H), 7.35 (s, 1H), 7.31-7.25 (m, 3H), 7.17-7.10 (m,

2H), 7.10-7.04 (m, 1H), 6.96 (s, 1H), 6.81 (s, 1H), 4.53 (d,  $J = 8.68$  Hz, 1H), 4.03 (d,  $J = 16.32$  Hz, 1H), 3.99 (s, 3H), 3.12-3.02 (m, 1H), 1.79 (s, 9H).  $^{13}\text{C}$  NMR (101 MHz,  $\text{CDCl}_3$ )  $\delta = 156.5, 146.9, 144.1, 143.8, 140.1, 133.9, 133.5, 132.5, 128.8, 128.7, 128.5, 127.9, 127.6, 127.1, 126.5, 126.2, 125.9, 125.7, 125.5, 104.6, 60.0, 54.9, 37.4, 34.8, 34.2, 29.9$ . HRMS (APCI)  $m/z$  calcd for  $\text{C}_{30}\text{H}_{30}\text{N}_5^+$  ( $\text{M}+\text{H}$ ) $^+$  460.2496, found 460.2488.

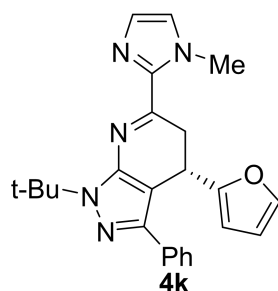

**(S)-1-(tert-butyl)-4-(furan-2-yl)-6-(1-methyl-1H-imidazol-2-yl)-3-phenyl-4,5-dihydro-1H-pyrazolo[3,4-b]pyridine (4k)**. Light yellow solid (37 mg, 92% yield). Mp: 140.6-141.6 °C. HPLC: 96% ee (Chiralpak IC column, 254 nm, hexane/isopropanol = 80:20, flow rate 0.7 mL/min,  $t_r$  (major) = 6.858 min,  $t_r$  (minor) = 7.672 min.  $[\alpha]_D^{20} = +24.5$  ( $c = 0.2, \text{CH}_2\text{Cl}_2$ ).  $^1\text{H}$  NMR (400 MHz,  $\text{CDCl}_3$ )  $\delta = 7.76-7.69$  (m, 2H), 7.37-7.29 (m, 2H), 7.29-7.26 (m, 1H), 7.26-7.21 (m, 1H), 7.14 (s, 1H), 6.97 (s, 1H), 6.13 (dd,  $J = 3.2, 1.8$  Hz, 1H), 5.83-5.80 (m, 1H), 4.50 (d,  $J = 8.1$  Hz, 1H), 4.21 (dd,  $J = 17.0, 2.0$  Hz, 1H), 4.09 (s, 3H), 2.91 (dd,  $J = 17.1, 8.6$  Hz, 1H), 1.80 (s, 9H).  $^{13}\text{C}$  NMR (100 MHz,  $\text{CDCl}_3$ )  $\delta = 156.7, 155.2, 146.3, 144.1, 143.4, 142.1, 133.9, 129.0, 128.5, 127.2, 126.5, 126.3, 110.0, 106.4, 102.9, 59.9, 37.5, 31.2, 29.8, 28.6$ . HRMS (APCI)  $m/z$  calcd for  $\text{C}_{24}\text{H}_{26}\text{N}_5\text{O}^+$  ( $\text{M}+\text{H}$ ) $^+$  400.2132, found 400.2128.

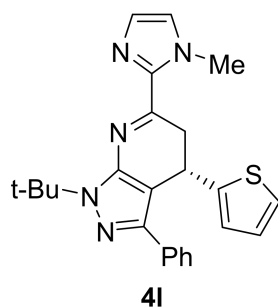



**(S)-1-(tert-butyl)-6-(1-methyl-1H-imidazol-2-yl)-3-phenyl-4-(thiophen-2-yl)-4,5-dihydro-1H-pyrazolo[3,4-b]pyridine (4l).** Light yellow solid (38 mg, 91% yield). Mp: 163.4-165.8 °C. HPLC: 95% ee (Chiralpak IC column, 254 nm, hexane/isopropanol = 95:5, flow rate 1.0 mL/min, tr (major) = 8.440 min, tr (minor) = 9.939 min.  $[\alpha]_{\text{D}}^{20} = +25.5$  (c = 0.2, CH<sub>2</sub>Cl<sub>2</sub>). <sup>1</sup>H NMR (400 MHz, CDCl<sub>3</sub>)  $\delta = 7.69$  (d,  $J = 7.3$  Hz, 2H), 7.35-7.28 (m, 2H), 7.26-7.20 (m, 1H), 7.12 (s, 1H), 7.04-7.00 (m, 1H), 6.95 (s, 1H), 6.82-6.77 (m, 1H), 6.73 (d,  $J = 3.36$  Hz, 1H), 4.71 (d,  $J = 8.12$  Hz, 1H), 4.13 (d,  $J = 17.76$  Hz, 1H), 4.08 (s, 3H), 3.12-3.00 (m, 1H), 1.81 (s, 9H). <sup>13</sup>C NMR (100 MHz, CDCl<sub>3</sub>)  $\delta = 156.4, 147.1, 146.0, 144.2, 143.2, 133.9, 129.0, 128.5, 127.2, 126.9, 126.5, 126.2, 124.2, 124.0, 105.5, 59.9, 37.4, 35.2, 30.0, 29.8$ . HRMS (APCI) m/z calcd for C<sub>24</sub>H<sub>26</sub>N<sub>5</sub>S<sup>+</sup> (M+H)<sup>+</sup> 416.1903, found 416.1896.

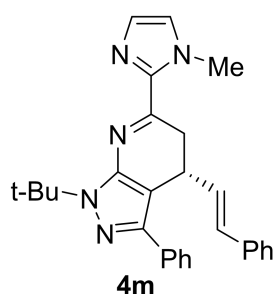

**(R,E)-1-(tert-butyl)-6-(1-methyl-1H-imidazol-2-yl)-3-phenyl-4-styryl-4,5-dihydro-1H-pyrazolo[3,4-b]pyridine (4m).** Light yellow solid (41 mg, 94% yield). Mp: 71.2-73.7 °C. HPLC: 98% ee (Chiralpak IC column, 254 nm, hexane/isopropanol = 95:5, flow rate 1.0 mL/min, tr (major) = 7.979 min, tr (minor) = 8.577 min.  $[\alpha]_{\text{D}}^{20} = +33.5$  (c = 0.2, CH<sub>2</sub>Cl<sub>2</sub>). <sup>1</sup>H NMR (400 MHz, CDCl<sub>3</sub>)  $\delta = 7.72$  (d,  $J = 7.56$  Hz, 2H), 7.30-7.23 (m, 2H), 7.20-7.00 (m, 7H), 6.89 (s, 1H), 6.17 (s, 2H), 4.00 (s, 3H), 3.93 (d,  $J = 8.68$  Hz, 1H), 3.86 (d,  $J = 16.92$  Hz, 1H), 2.85-2.75 (m, 1H), 1.72 (s, 9H). <sup>13</sup>C NMR (100 MHz, CDCl<sub>3</sub>)  $\delta = 156.8, 146.1, 144.3, 143.6, 137.1, 134.1, 130.5, 130.3, 128.9, 128.6, 128.4, 127.3, 127.2, 126.5, 126.4, 104.4, 59.9, 37.5, 32.1, 31.7, 29.9$ . HRMS (APCI) m/z calcd for C<sub>28</sub>H<sub>30</sub>N<sub>5</sub><sup>+</sup> (M+H)<sup>+</sup> 436.2496, found 436.2488.

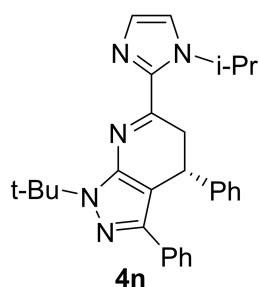

**(R)-1-(tert-butyl)-6-(1-isopropyl-1H-imidazol-2-yl)-3,4-diphenyl-4,5-dihydro-1H-pyrazolo[3,4-b]pyridine (4n).** Light yellow solid (38 mg, 88% yield). Mp: 92.3-93.7 °C. HPLC: 87% ee (Chiralpak IC column, 254 nm, hexane/isopropanol = 95:5, flow rate 1.0 mL/min, tr (major) = 6.686 min, tr (minor) = 7.607 min.  $[\alpha]_D^{20} = +21.5$  (c = 0.2, CH<sub>2</sub>Cl<sub>2</sub>). <sup>1</sup>H NMR (400 MHz, CDCl<sub>3</sub>)  $\delta = 7.61-7.48$  (m, 2H), 7.27-7.22 (m, 2H), 7.21-7.14 (m, 4H), 7.14-7.05 (m, 4H), 6.08-5.86 (m, 1H), 4.44 (d,  $J = 6.9$  Hz, 1H), 3.95 (d,  $J = 16.8$  Hz, 1H), 3.15 (dd,  $J = 16.9, 9.1$  Hz, 1H), 1.82 (s, 9H), 1.50 (d,  $J = 6.7$  Hz, 3H), 1.41 (d,  $J = 6.7$  Hz, 3H). <sup>13</sup>C NMR (100 MHz, CDCl<sub>3</sub>)  $\delta = 157.1, 146.7, 143.7, 143.5, 142.8, 134.1, 129.5, 128.8, 128.5, 127.3, 127.1, 126.7, 126.6, 120.0, 105.1, 59.9, 48.7, 35.8, 34.4, 30.0, 24.0, 23.9$ . HRMS (APCI) m/z calcd for C<sub>28</sub>H<sub>32</sub>N<sub>5</sub><sup>+</sup> (M+H)<sup>+</sup> 438.2652, found 438.2646.

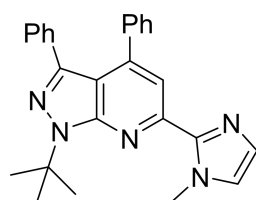

**6a**

**1-(tert-butyl)-6-(1-methyl-1H-imidazol-2-yl)-3,4-diphenyl-1H-pyrazolo[3,4-b]pyridine (6a).** Light yellow solid (24 mg, 60% yield). Mp: 124.5-126.6 °C. <sup>1</sup>H NMR (400 MHz, CDCl<sub>3</sub>)  $\delta = 8.12$  (s, 1H), 7.23 (d,  $J = 6.8$  Hz, 3H), 7.19 (s, 1H), 7.17-7.11 (m, 5H), 7.09-7.04 (m, 3H), 4.29 (s, 3H), 1.95 (s, 9H). <sup>13</sup>C NMR (100 MHz, CDCl<sub>3</sub>)  $\delta = 150.8, 146.0, 145.3, 142.4, 137.4, 133.7, 129.4, 129.3, 128.4, 128.1, 127.7, 127.5, 127.2, 124.8, 116.8, 111.7, 60.0, 37.0, 29.3$ . HRMS (APCI) m/z calcd for C<sub>26</sub>H<sub>26</sub>N<sub>5</sub><sup>+</sup> (M+H)<sup>+</sup> 408.2183, found 408.2176.

### III References

- (1) C. Y. Wang, L. A. Chen, H. H. Huo, X. D. Shen, K. Harms, L. Gong, E. Meggers, *Chem. Sci.* **2015**, *6*, 1094-1100.
- (2) X. Gao, C. W. Li, Chen L, L. Xin, *Org. Lett.* **2023**, *25*, 7628-7632.
- (3) L. C. He, E.-A. M. A. Ahmed, H. X. Liu, X. G. Hu, H. P. Xiao, J. Li, J. Jiang, *J. Org. Chem.* **2021**, *86*, 4825-4834.



### <sup>1</sup>H NMR-3b (400 MHz, CDCl<sub>3</sub>)

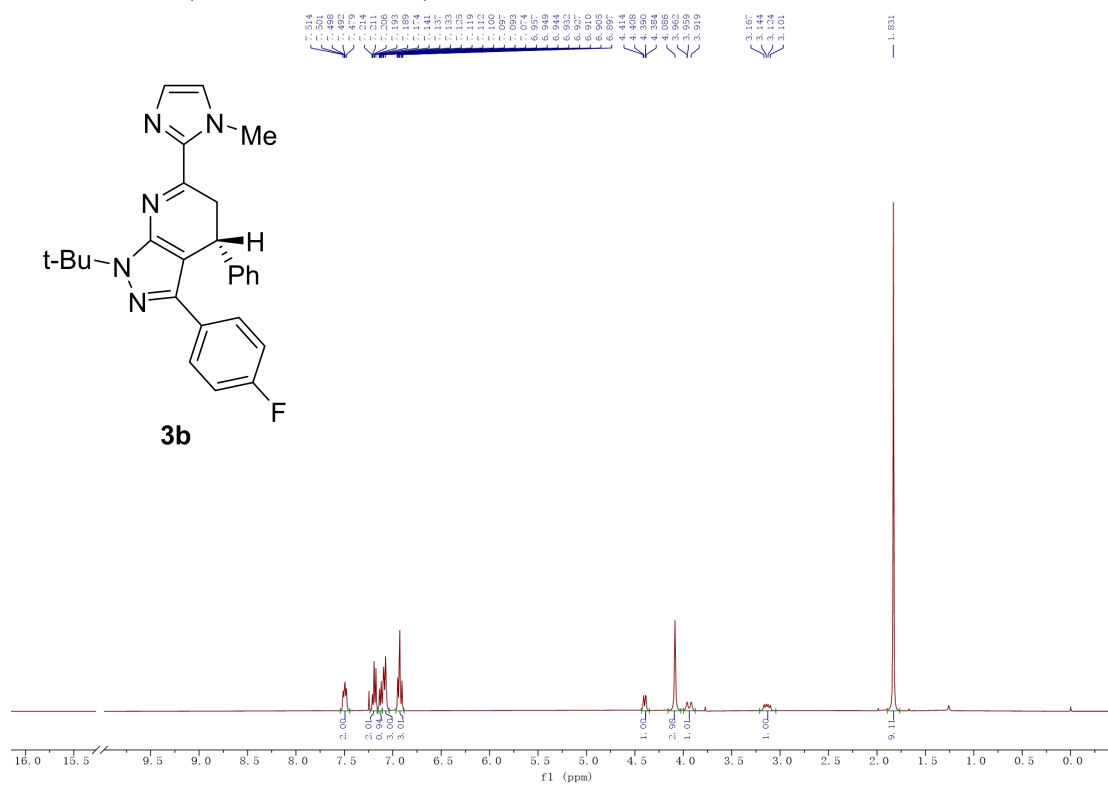

### <sup>13</sup>C NMR-3b (100 MHz, CDCl<sub>3</sub>)

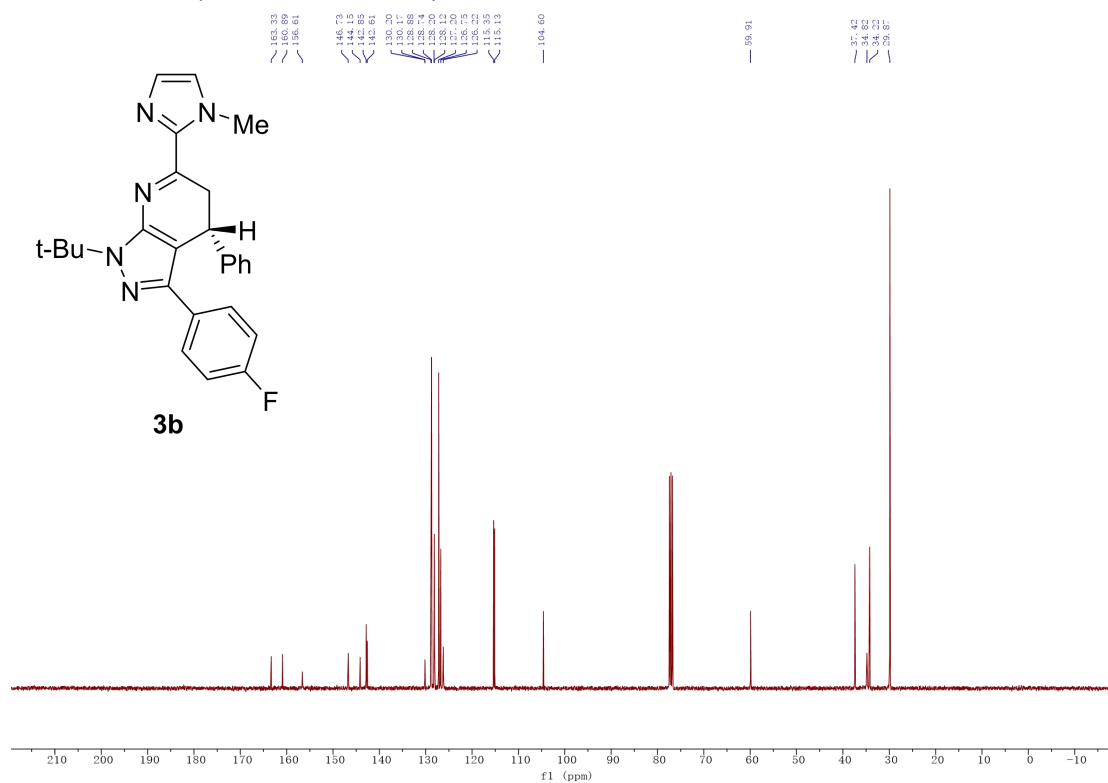

**<sup>19</sup>F NMR-3b (376 MHz, CDCl<sub>3</sub>)**

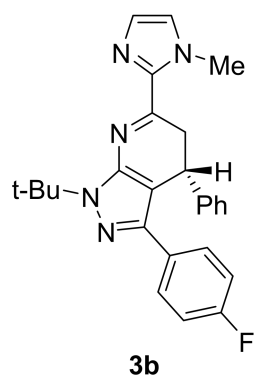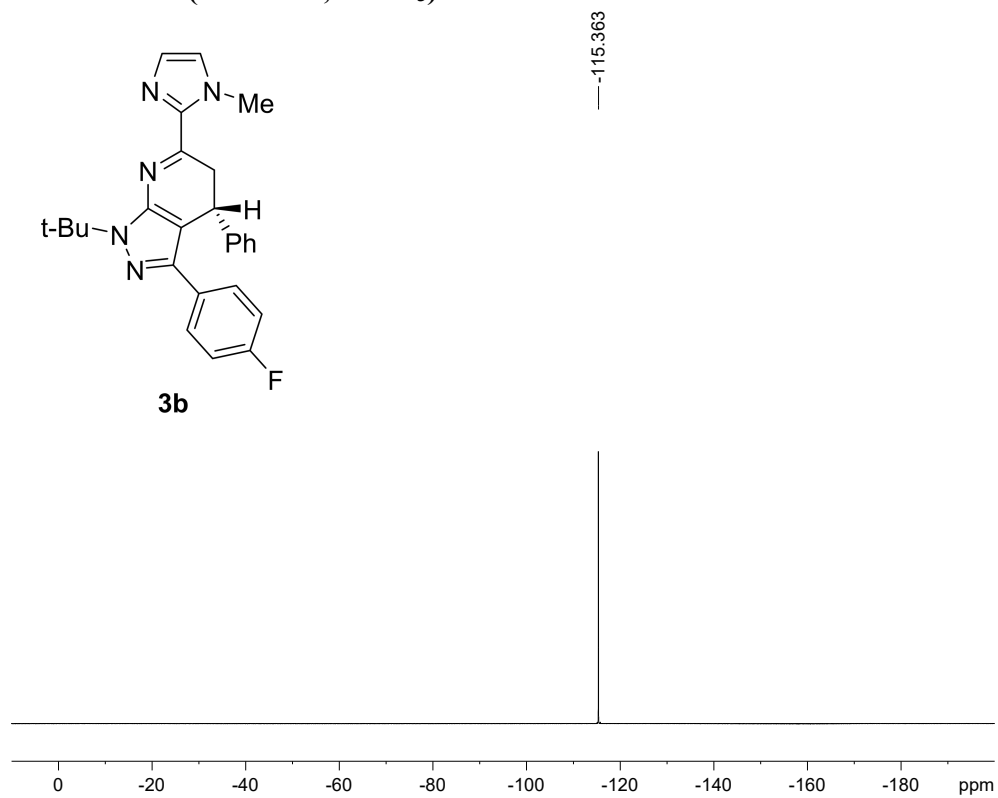



### <sup>1</sup>H NMR-3d (400 MHz, CDCl<sub>3</sub>)

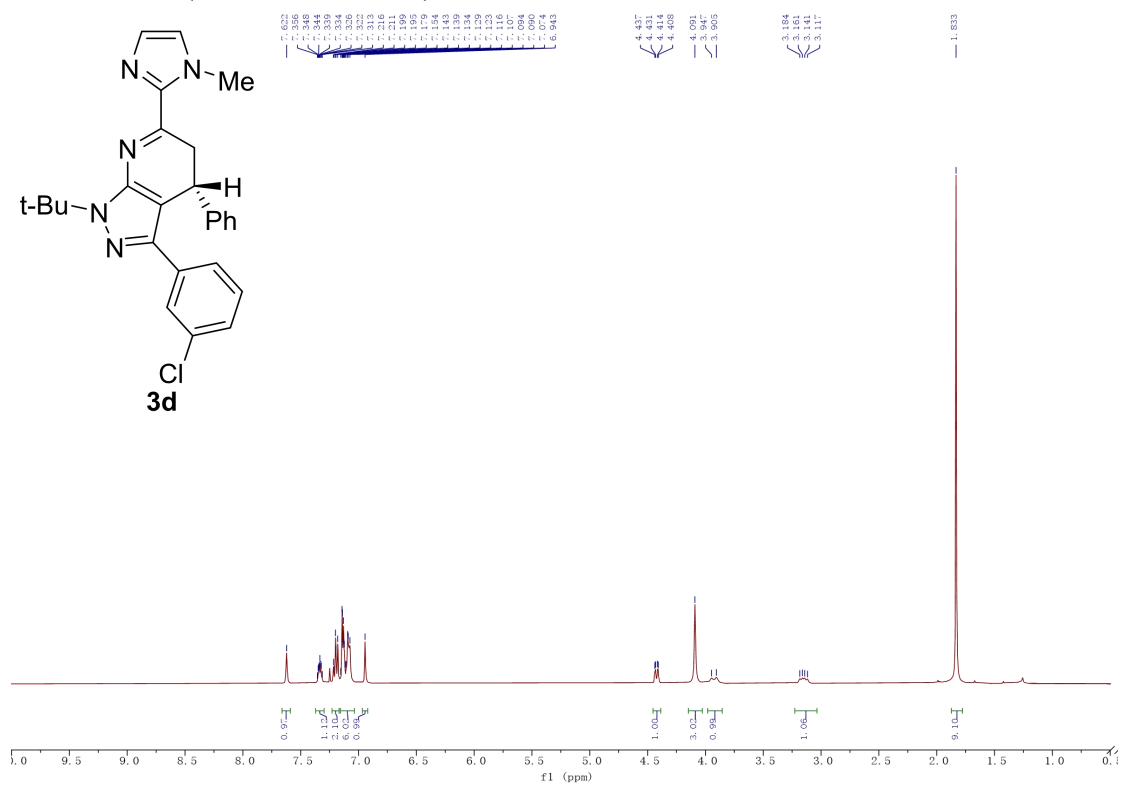

### <sup>13</sup>C NMR-3d (100 MHz, CDCl<sub>3</sub>)

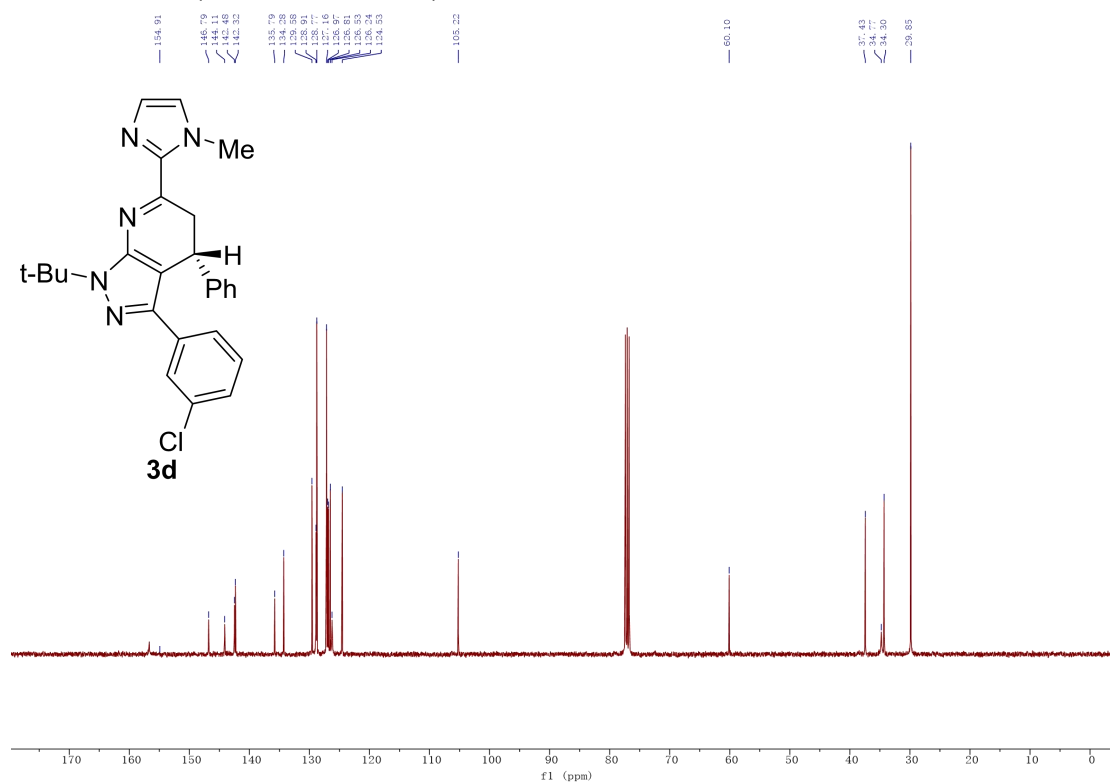



### <sup>1</sup>H NMR-3e (400 MHz, CDCl<sub>3</sub>)

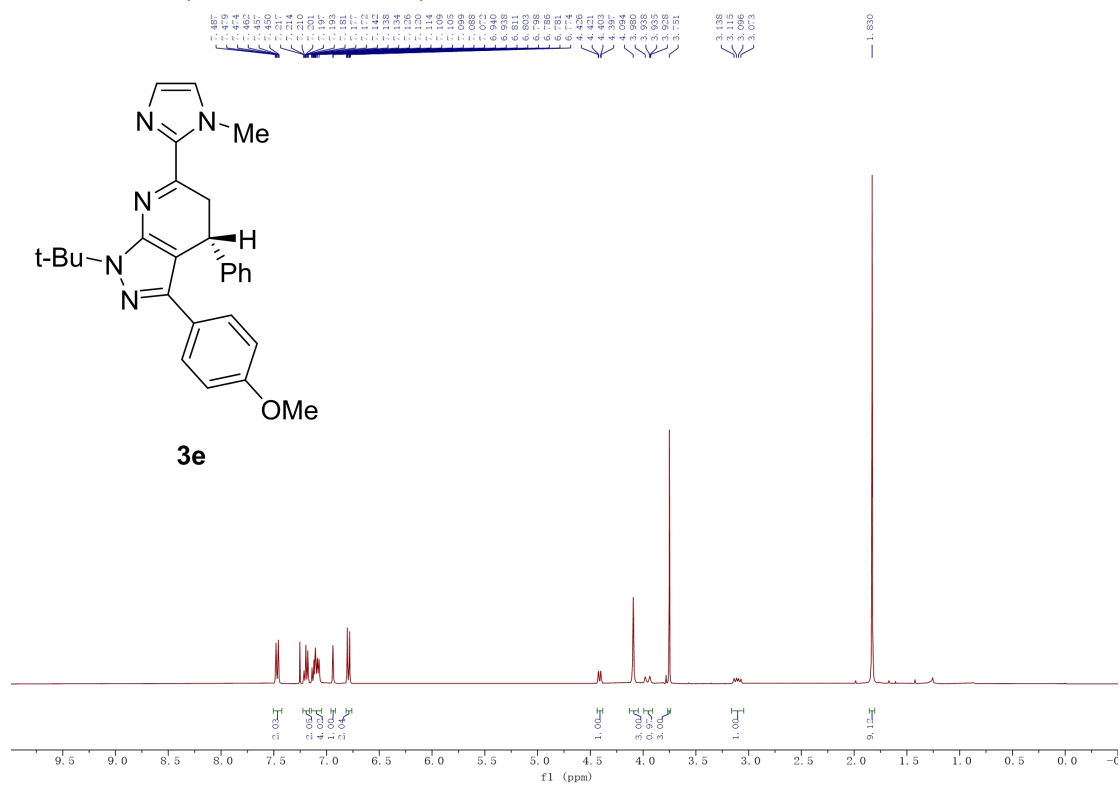

### <sup>13</sup>C NMR-3e (100 MHz, CDCl<sub>3</sub>)

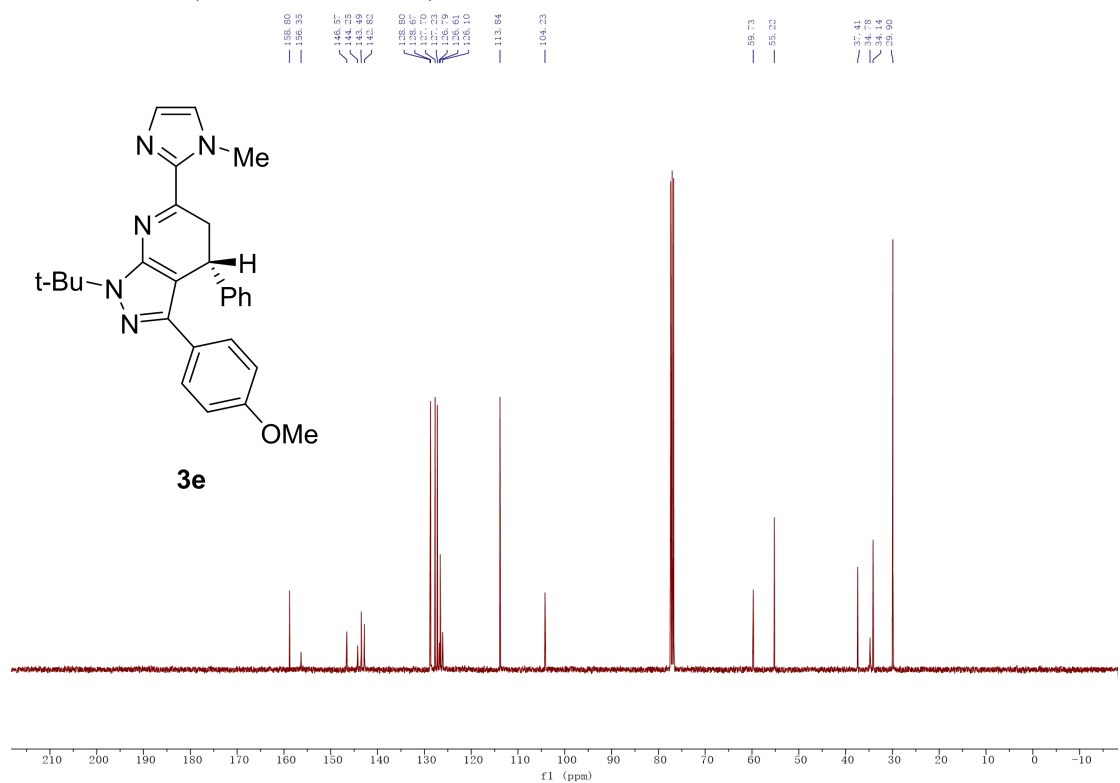

### <sup>1</sup>H NMR-3f (400 MHz, CDCl<sub>3</sub>)

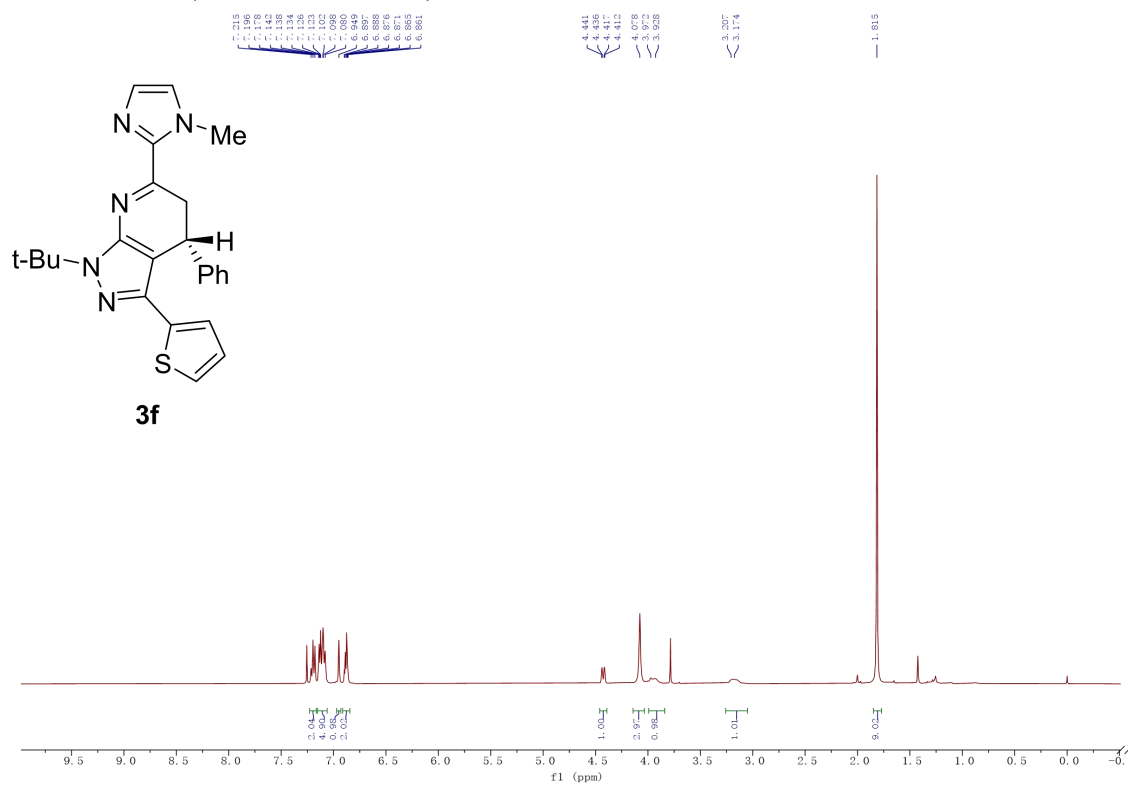

### <sup>13</sup>C NMR-3f (100 MHz, CDCl<sub>3</sub>)

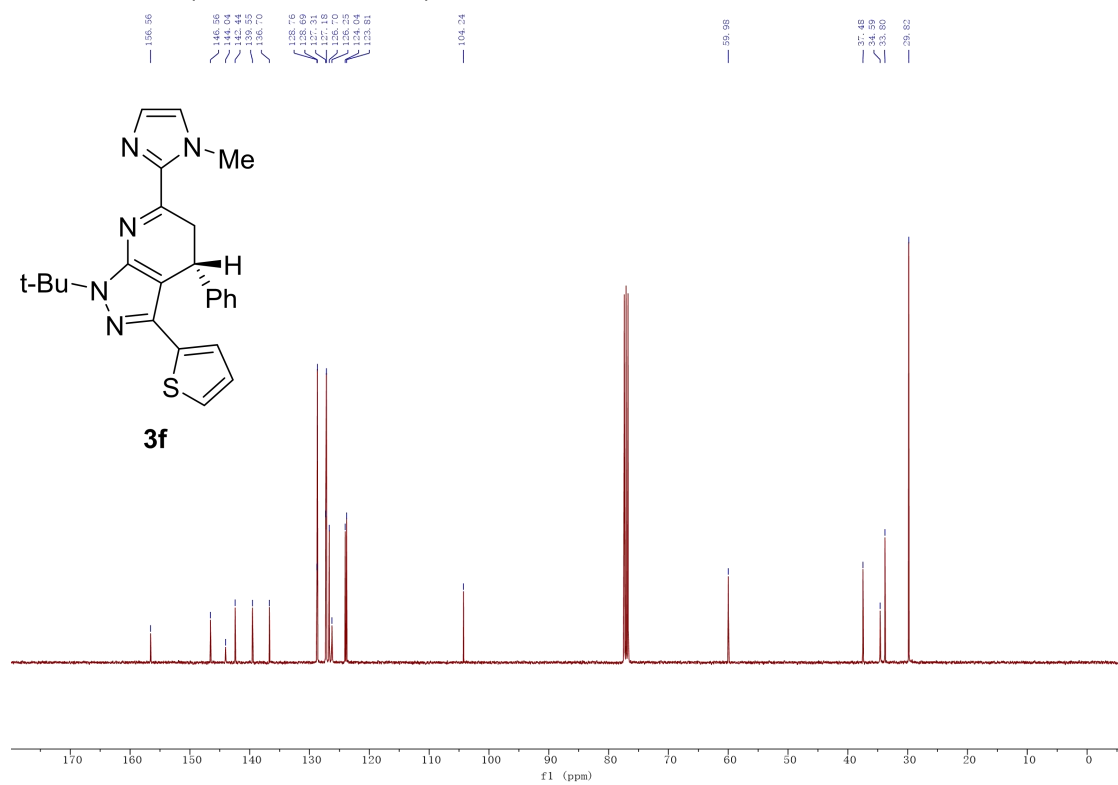

### <sup>1</sup>H NMR-3g (400 MHz, CDCl<sub>3</sub>)

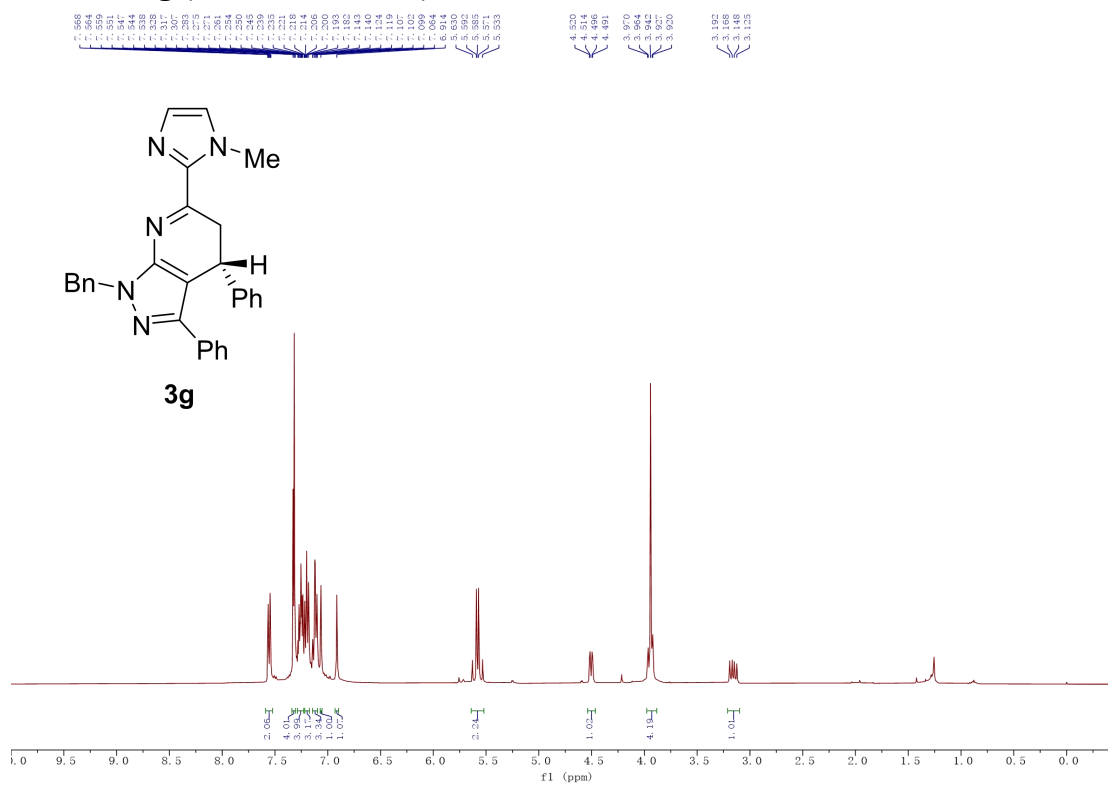

### <sup>13</sup>C NMR-3g (100 MHz, CDCl<sub>3</sub>)

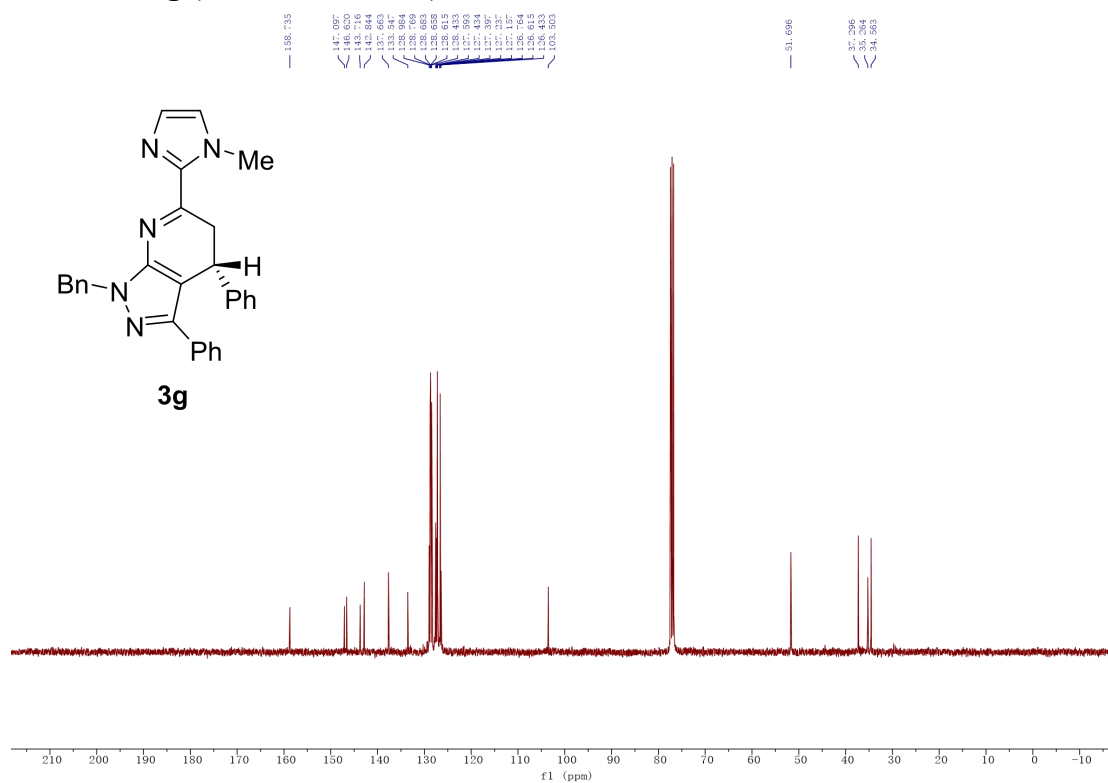

### <sup>1</sup>H NMR-3h (400 MHz, CDCl<sub>3</sub>)

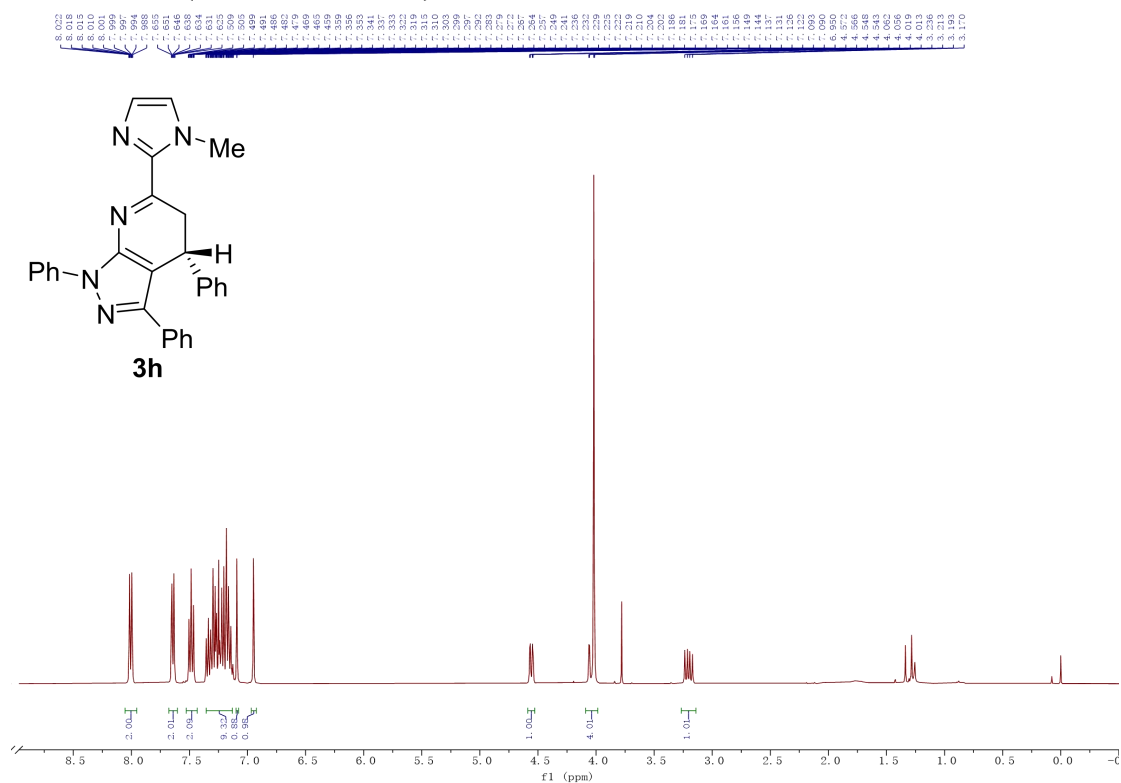

### <sup>13</sup>C NMR-3h (100 MHz, CDCl<sub>3</sub>)

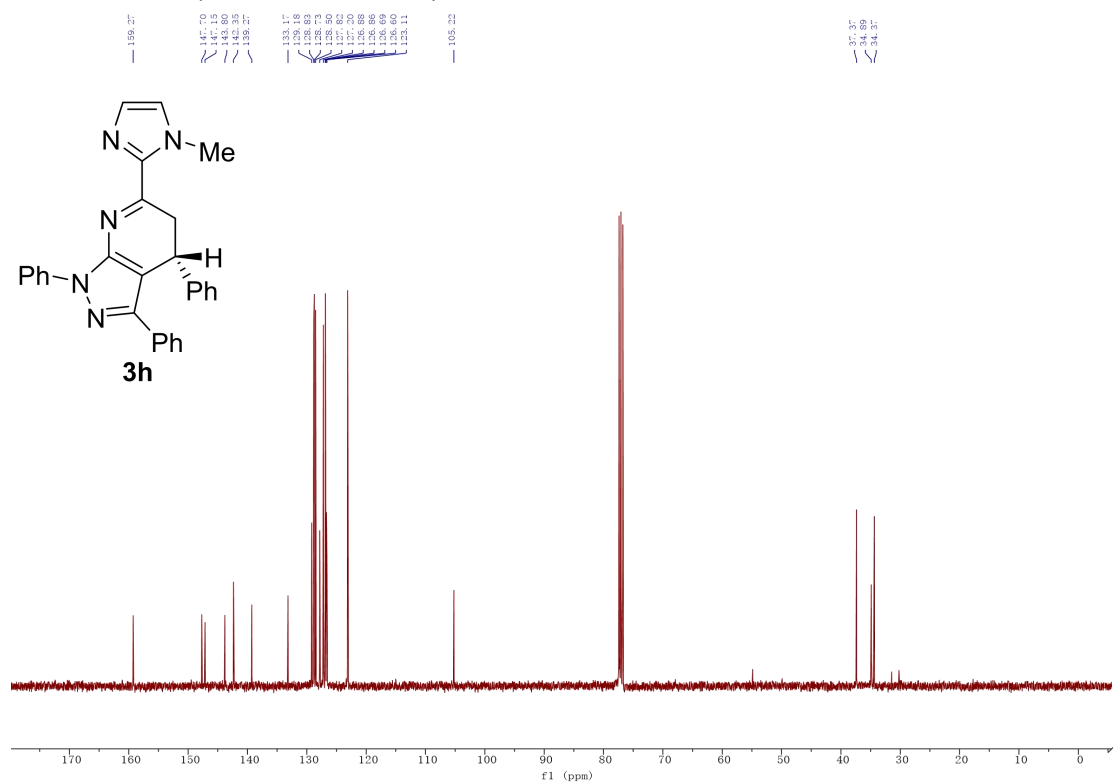



### <sup>1</sup>H NMR-3j (400 MHz, CDCl<sub>3</sub>)

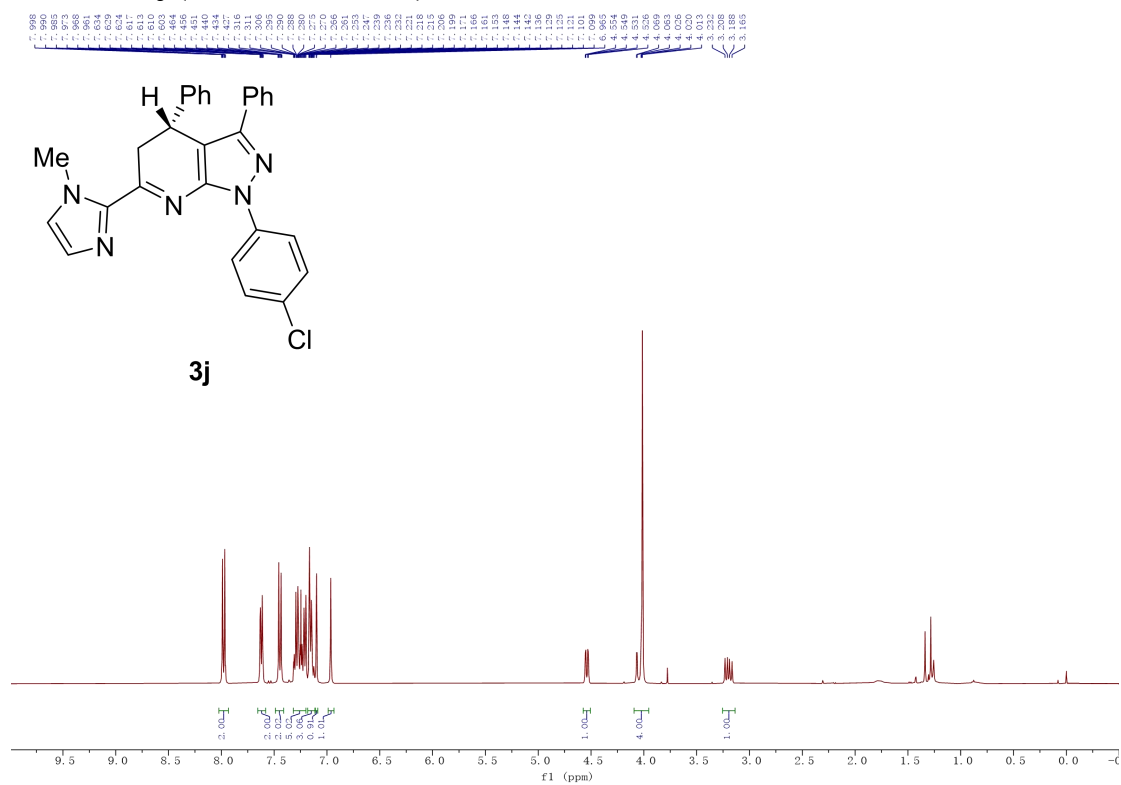

### <sup>13</sup>C NMR-3j (100 MHz, CDCl<sub>3</sub>)

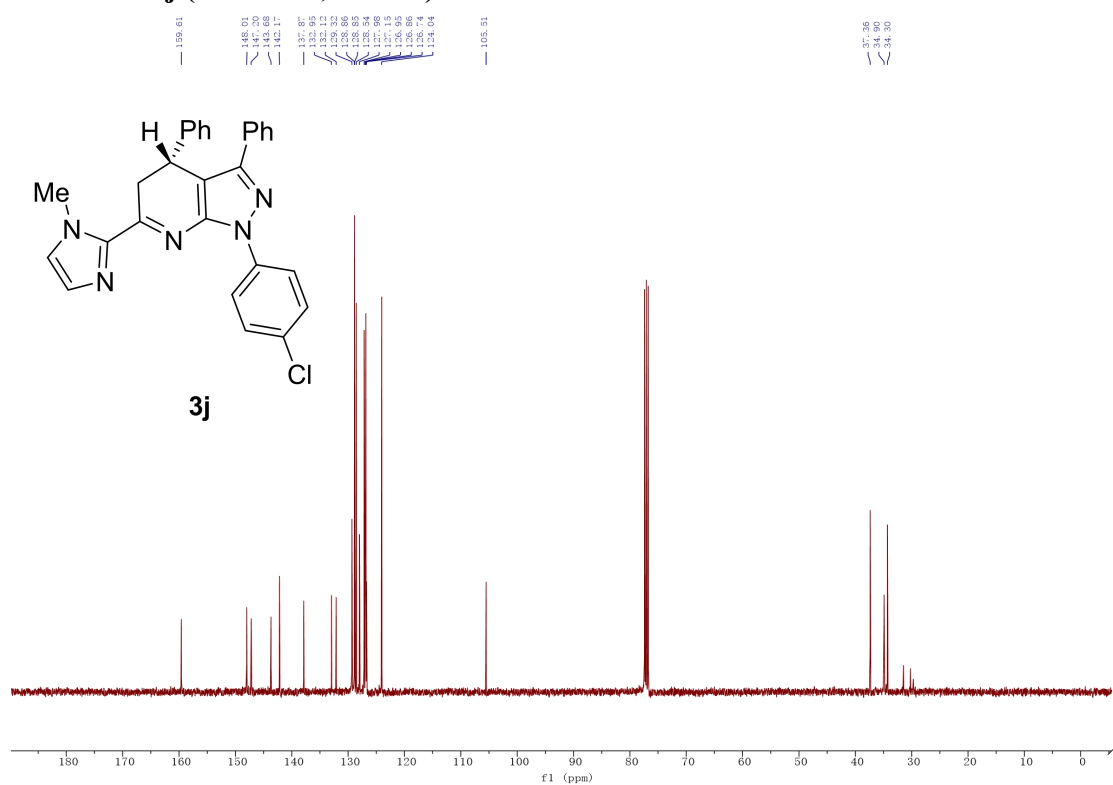

### <sup>1</sup>H NMR-3k (400 MHz, CDCl<sub>3</sub>)

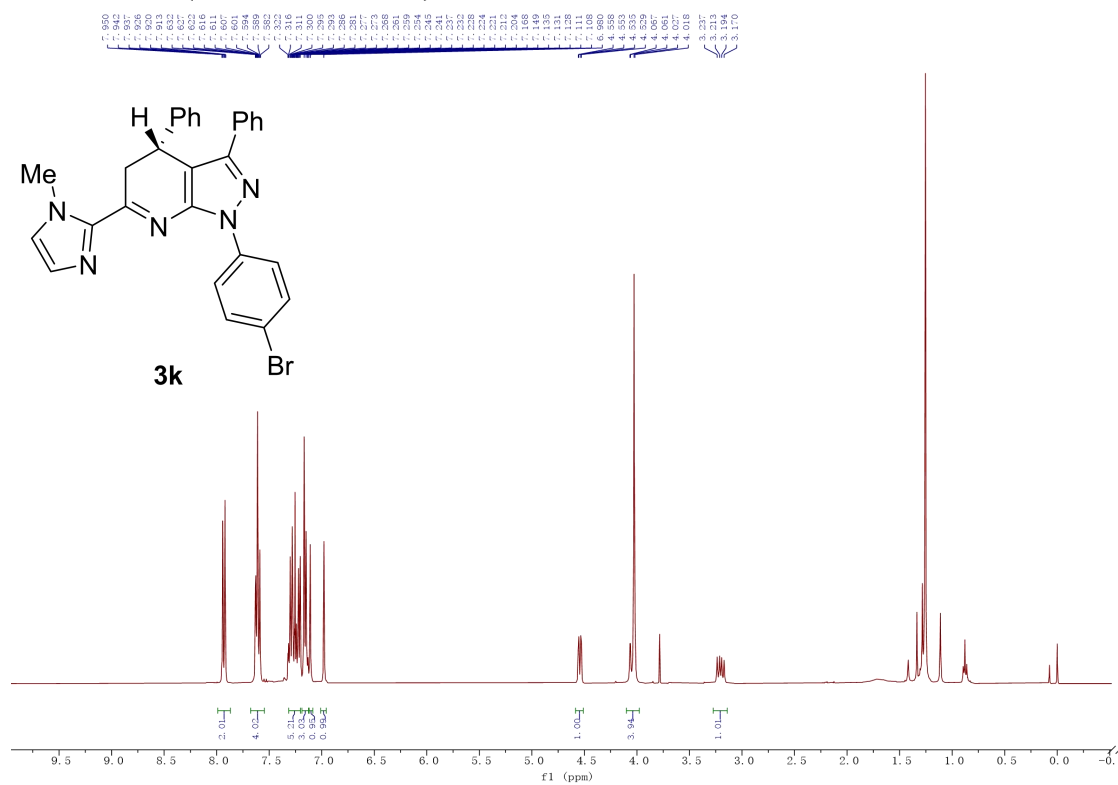

### <sup>13</sup>C NMR-3k (100 MHz, CDCl<sub>3</sub>)

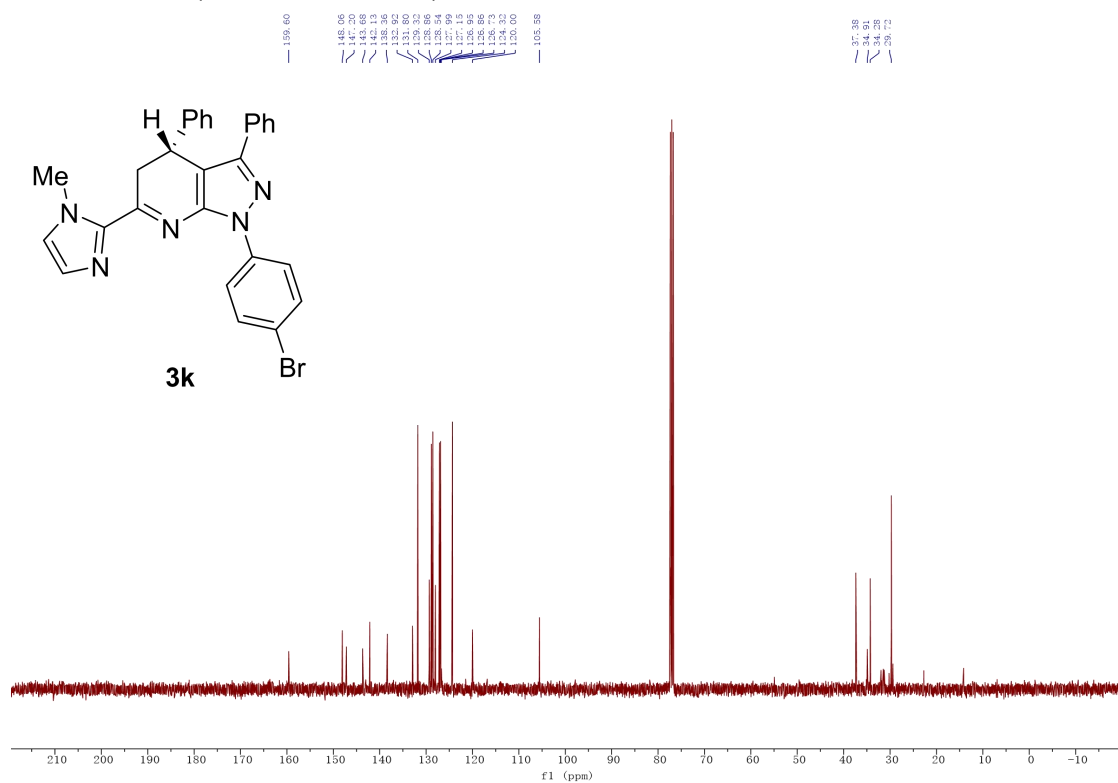

### <sup>1</sup>H NMR-31 (400 MHz, CDCl<sub>3</sub>)

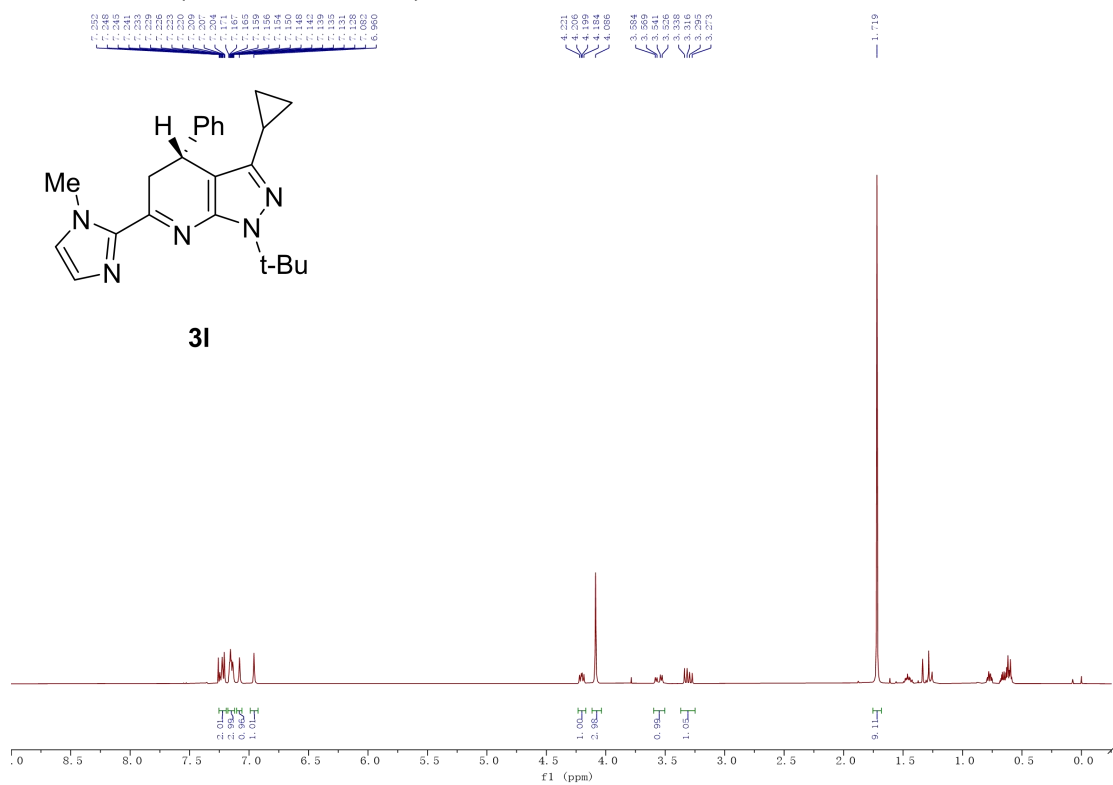

### <sup>13</sup>C NMR-31 (100 MHz, CDCl<sub>3</sub>)

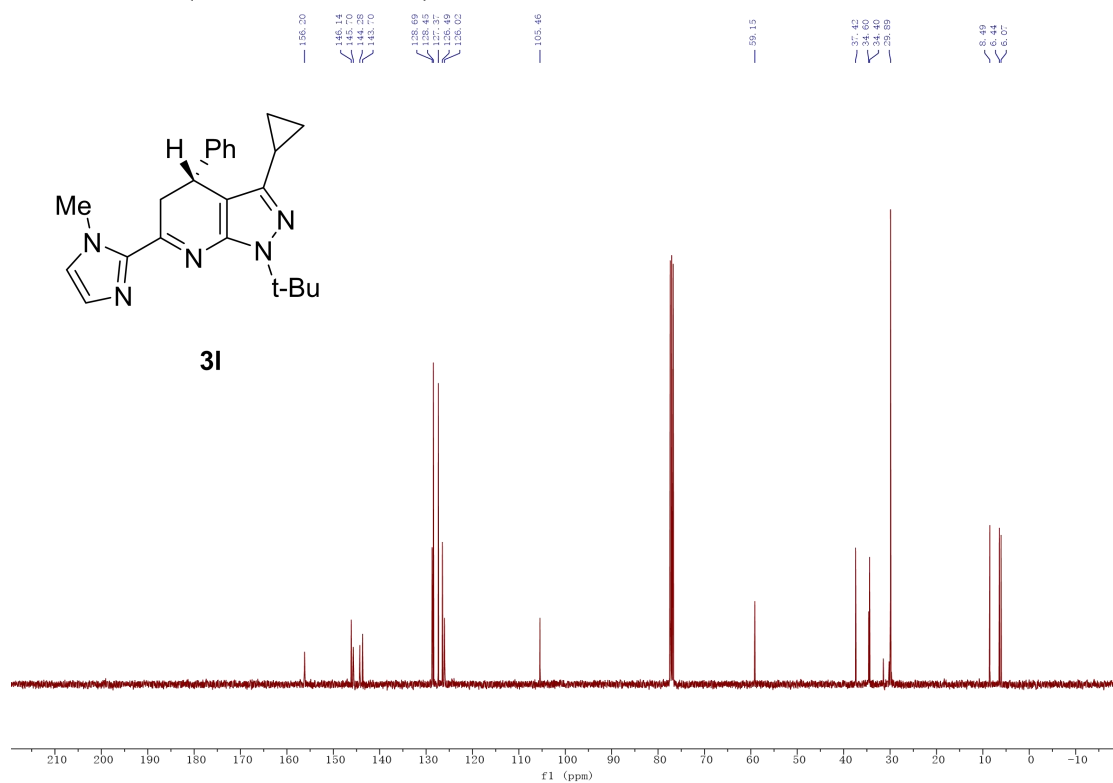



**<sup>1</sup>H NMR-3m (400 MHz, CDCl<sub>3</sub>)**

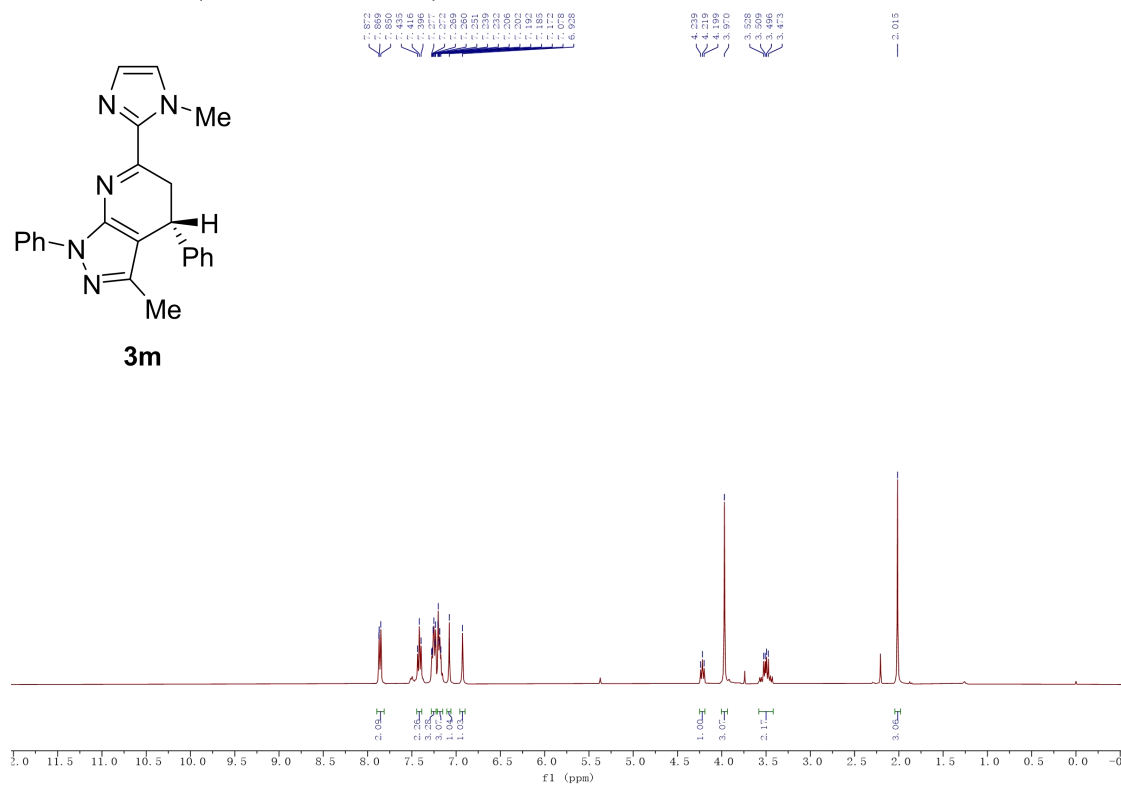

**<sup>13</sup>C NMR-3m (100 MHz, CDCl<sub>3</sub>)**

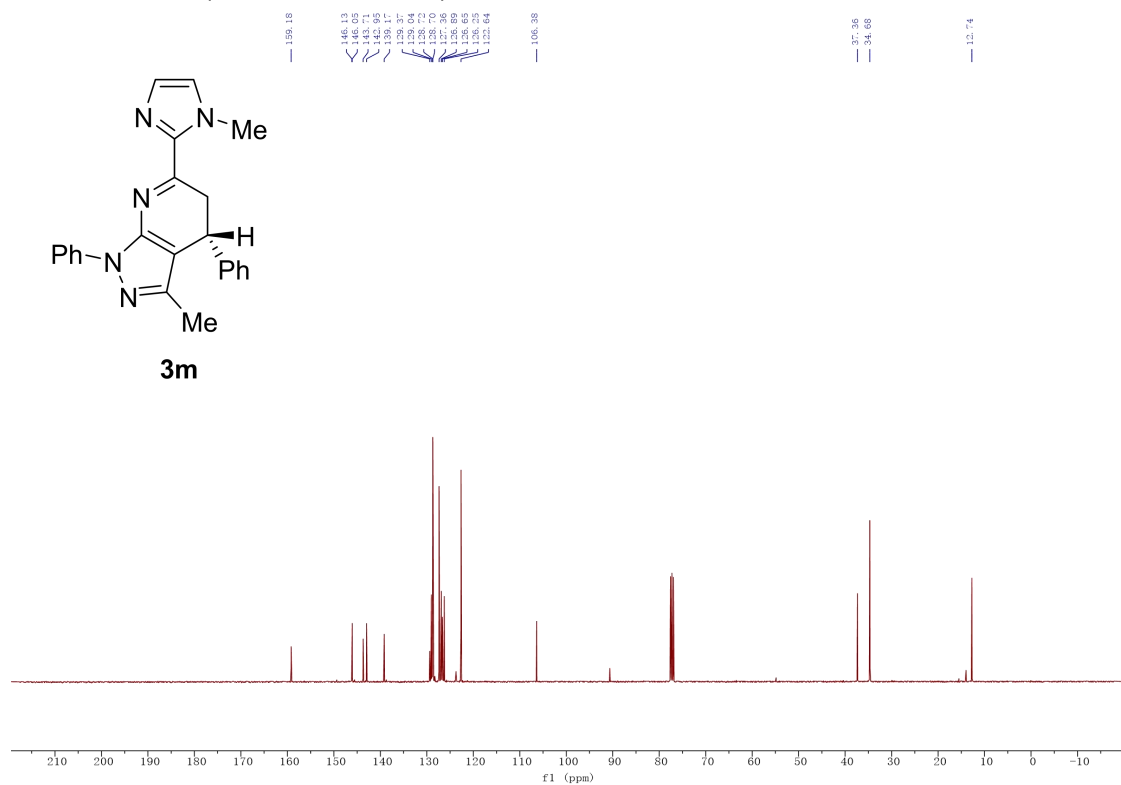

### <sup>1</sup>H NMR-3n (400 MHz, CDCl<sub>3</sub>)

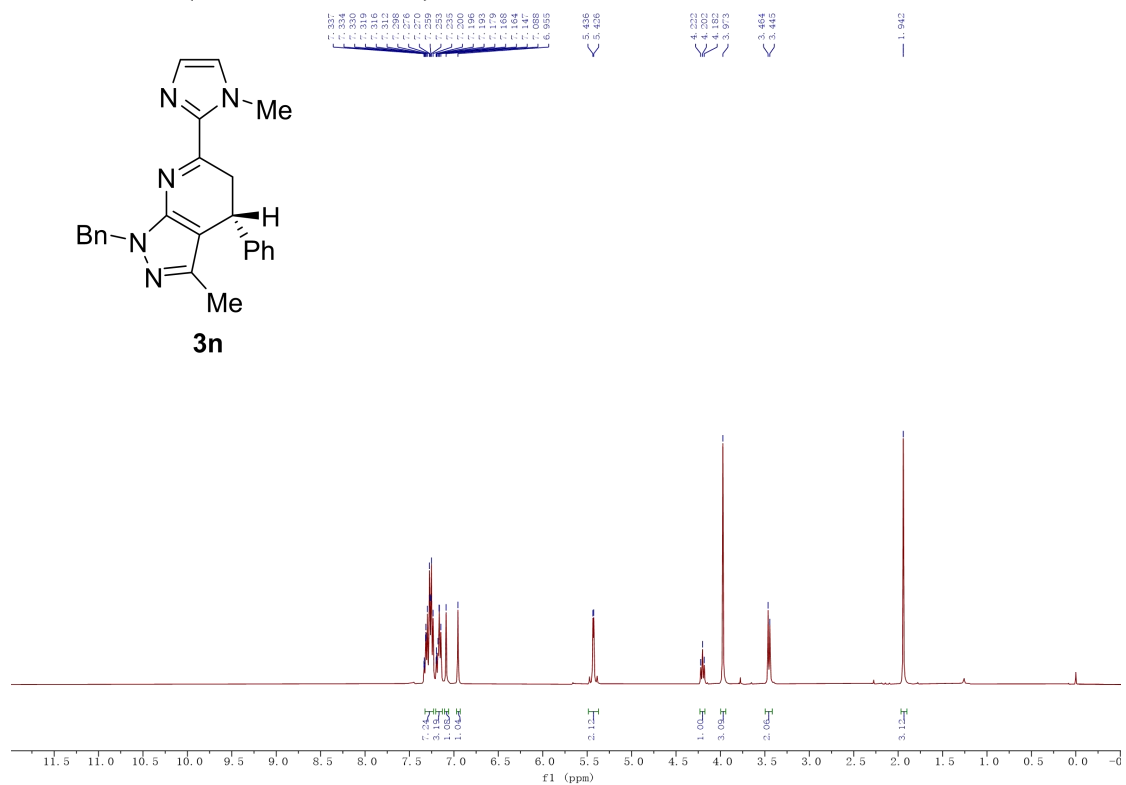

### <sup>13</sup>C NMR-3n (100 MHz, CDCl<sub>3</sub>)

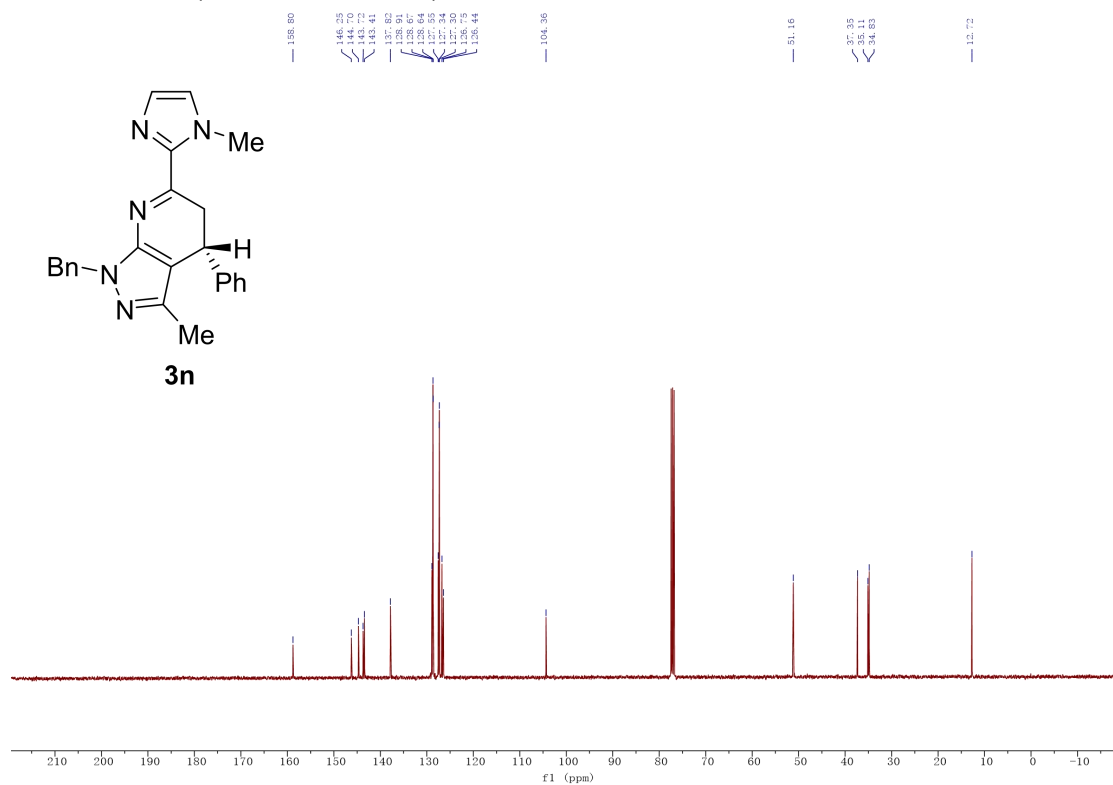







### <sup>1</sup>H NMR-4d (400 MHz, CDCl<sub>3</sub>)

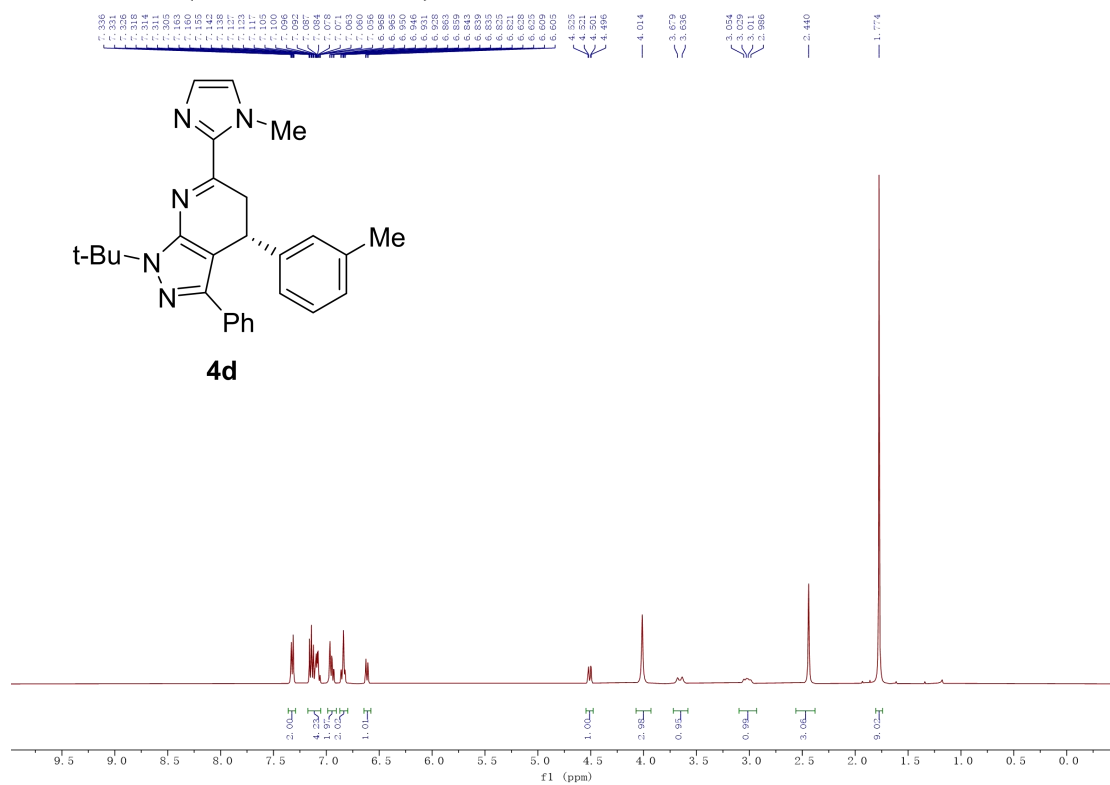

### <sup>13</sup>C NMR-4d (100 MHz, CDCl<sub>3</sub>)

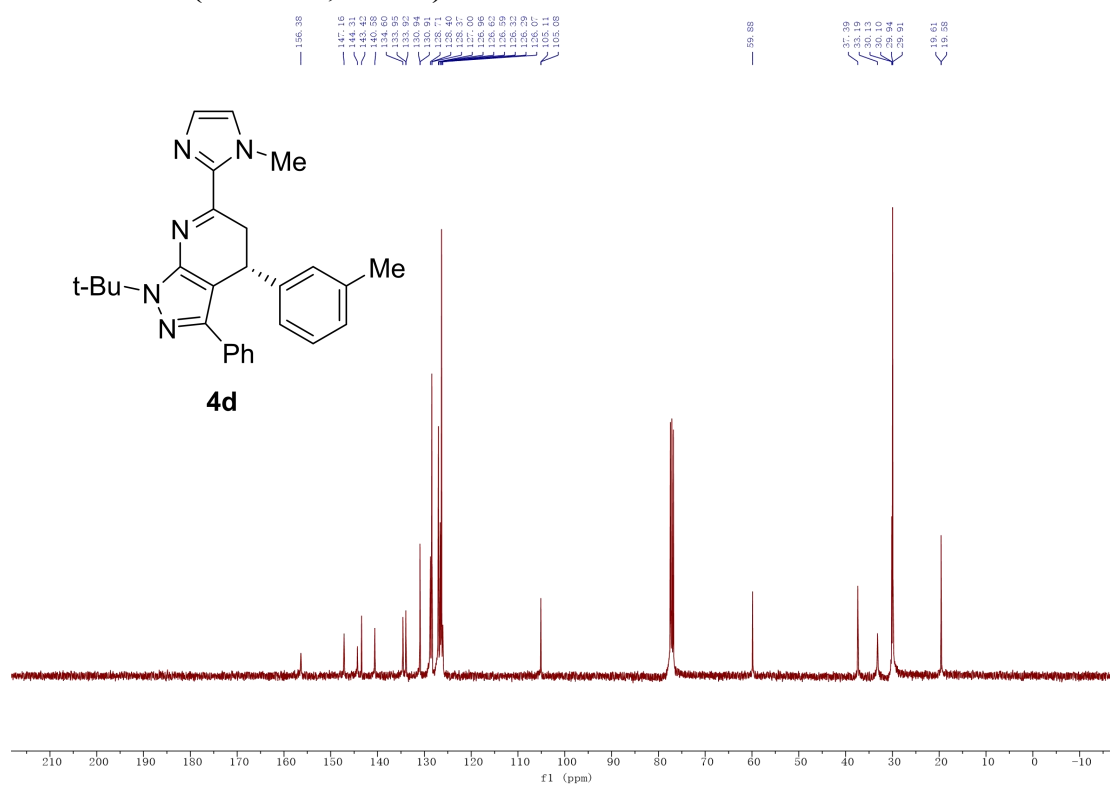

### <sup>1</sup>H NMR-4e (400 MHz, CDCl<sub>3</sub>)

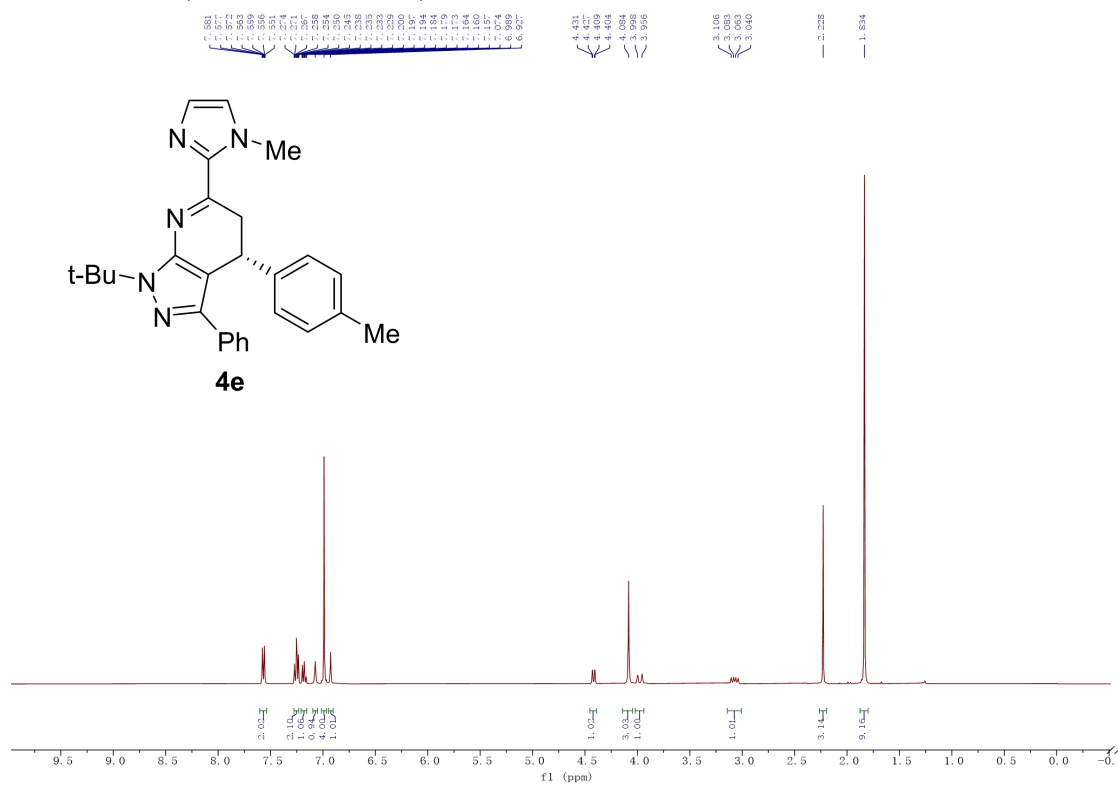







### <sup>1</sup>H NMR-4h (400 MHz, CDCl<sub>3</sub>)

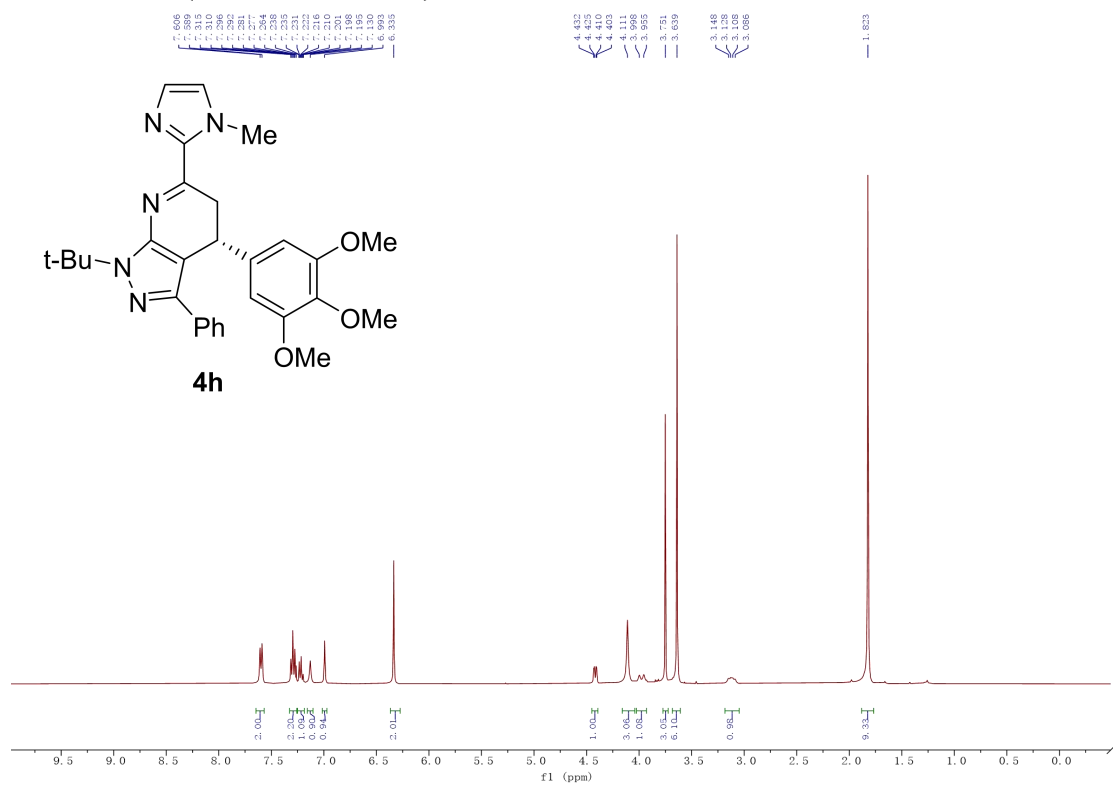

### <sup>13</sup>C NMR-4h (100 MHz, CDCl<sub>3</sub>)

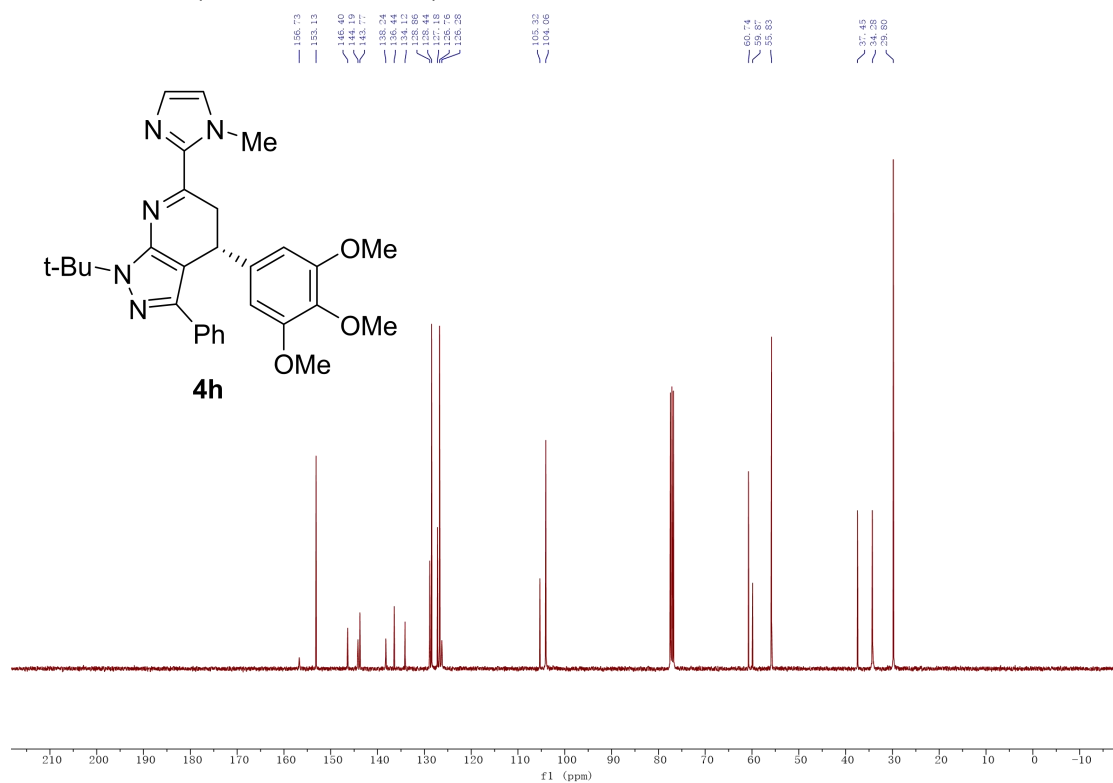

### <sup>1</sup>H NMR-4i (400 MHz, CDCl<sub>3</sub>)

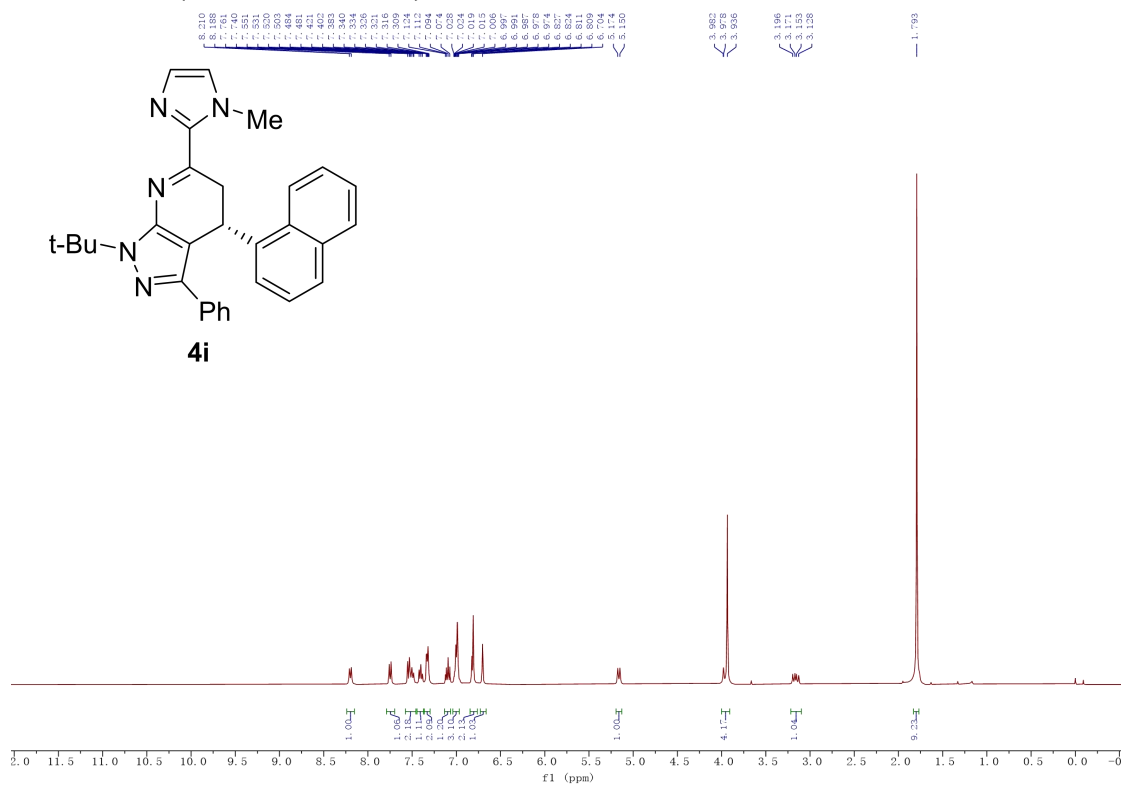

### <sup>13</sup>C NMR-4i (100 MHz, CDCl<sub>3</sub>)

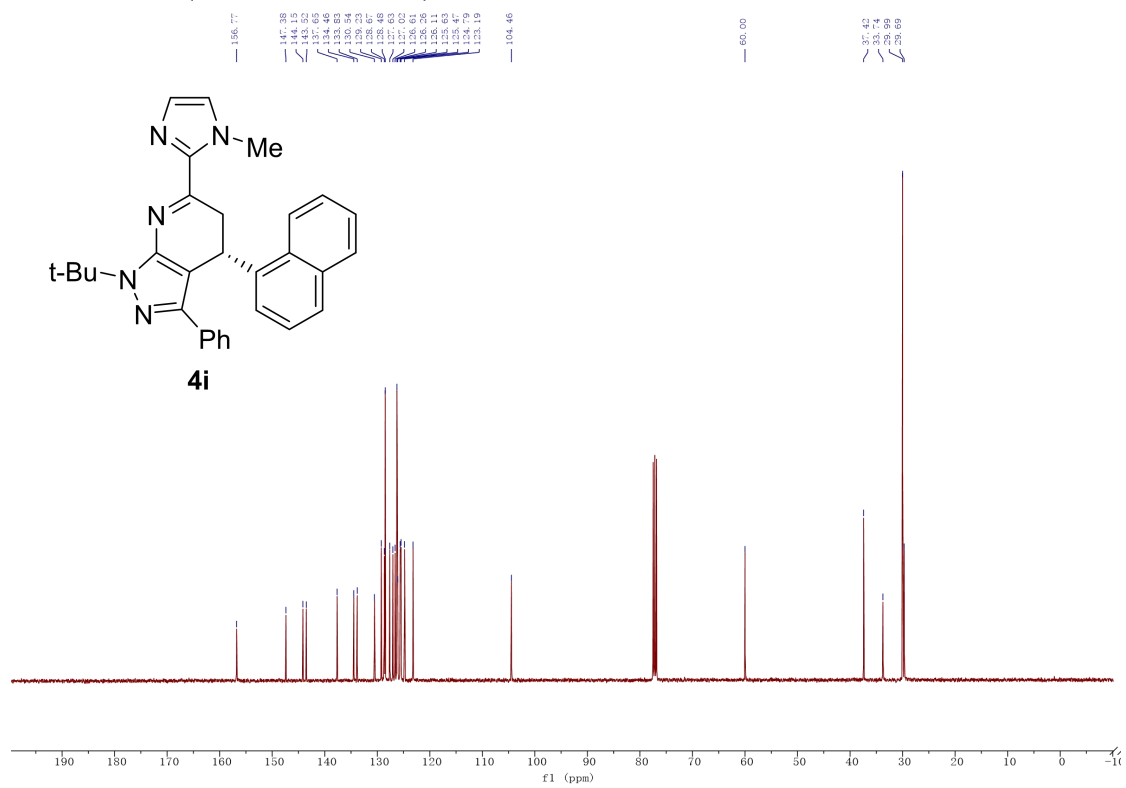

### <sup>1</sup>H NMR-4j (400 MHz, CDCl<sub>3</sub>)

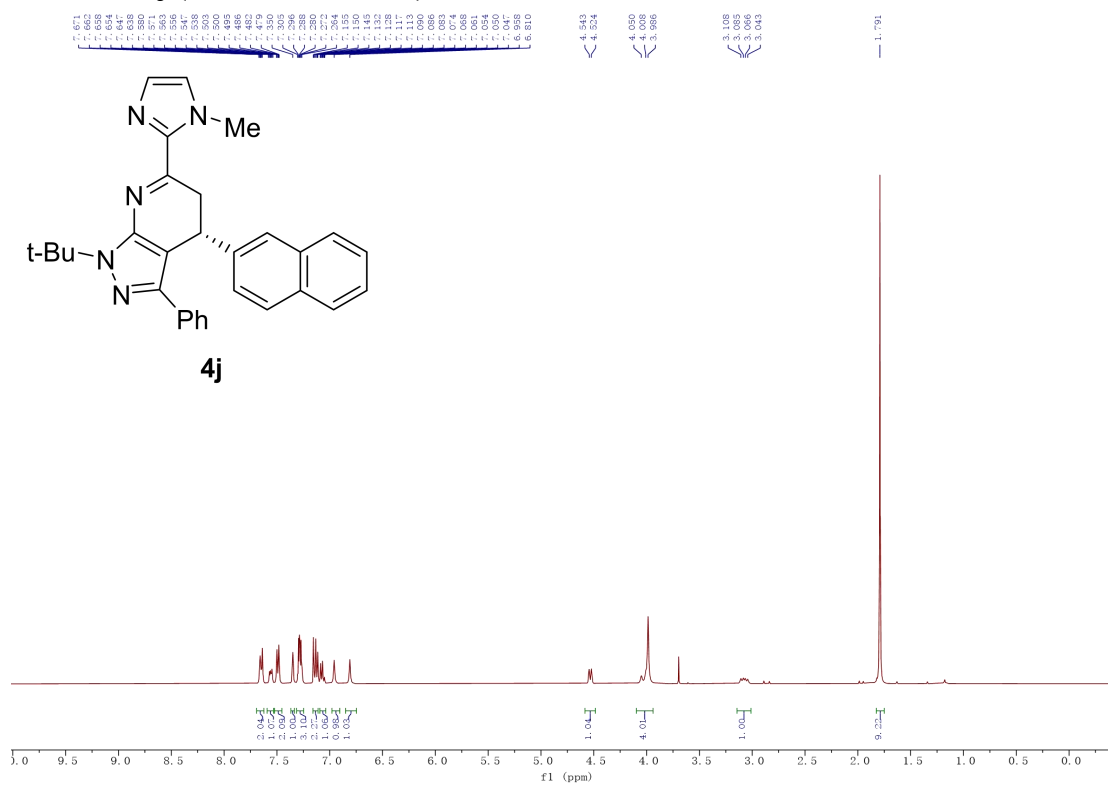

### <sup>13</sup>C NMR-4j (100 MHz, CDCl<sub>3</sub>)

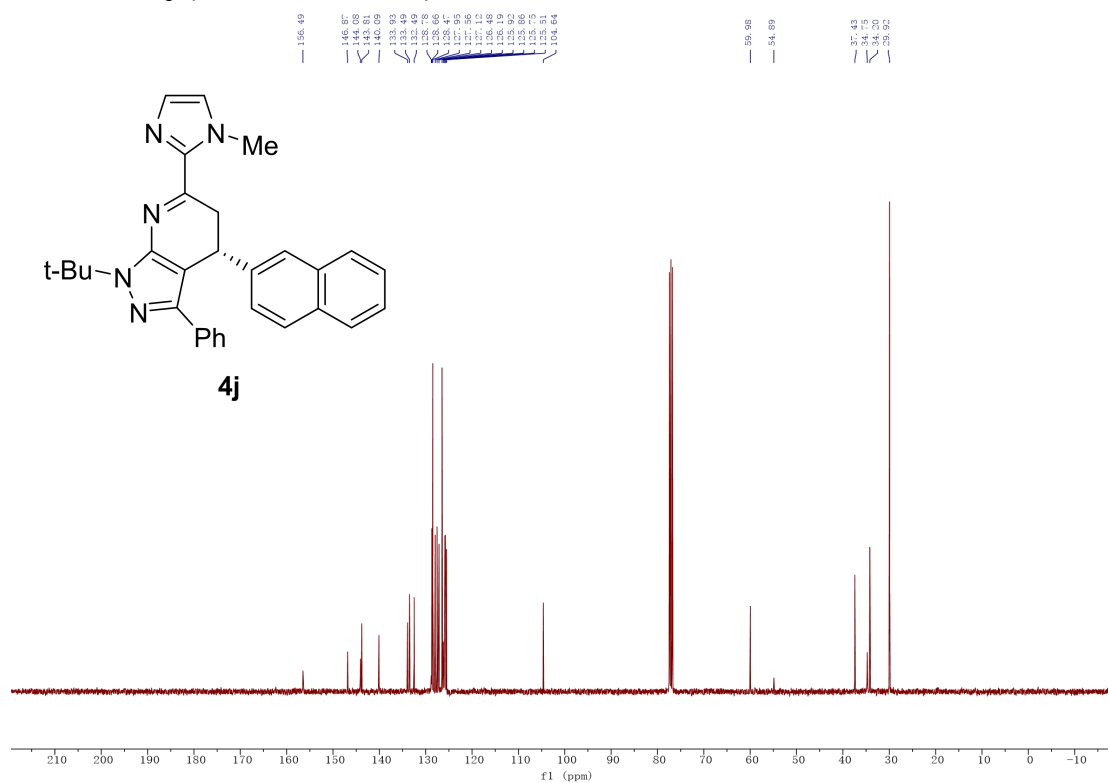

### $^1\text{H}$ NMR-4k (400 MHz, $\text{CDCl}_3$ )

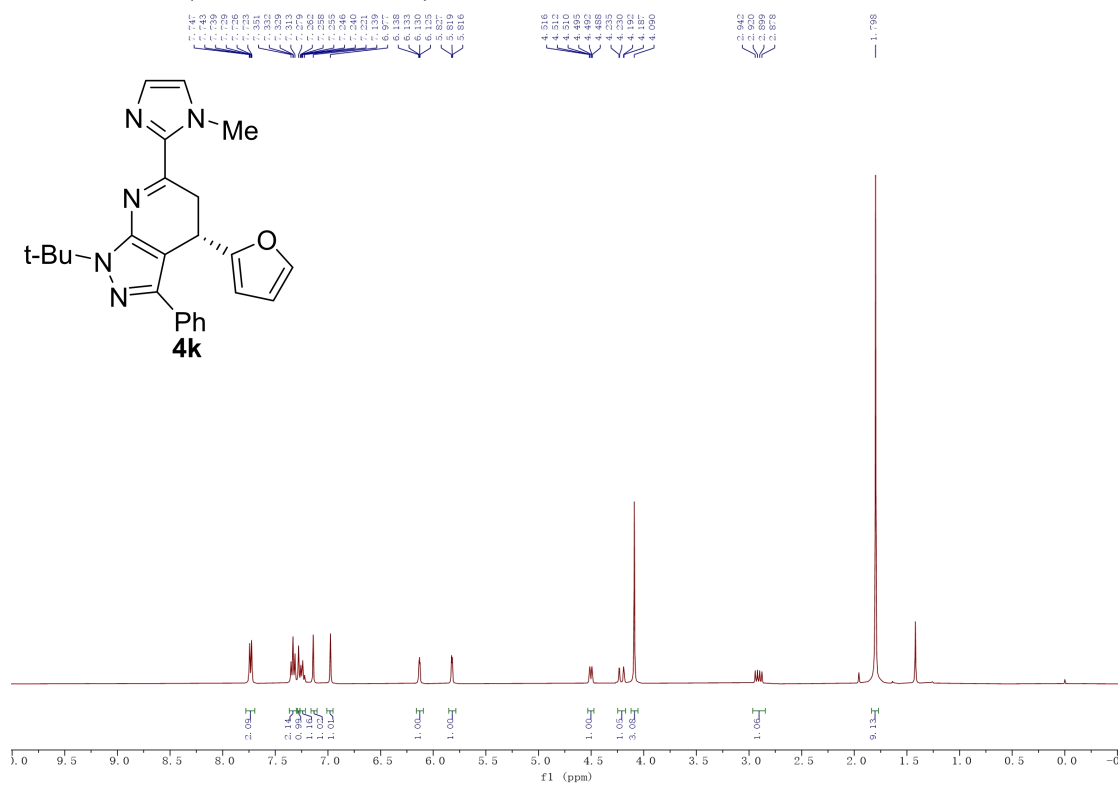

### $^{13}\text{C}$ NMR-4k (100 MHz, $\text{CDCl}_3$ )

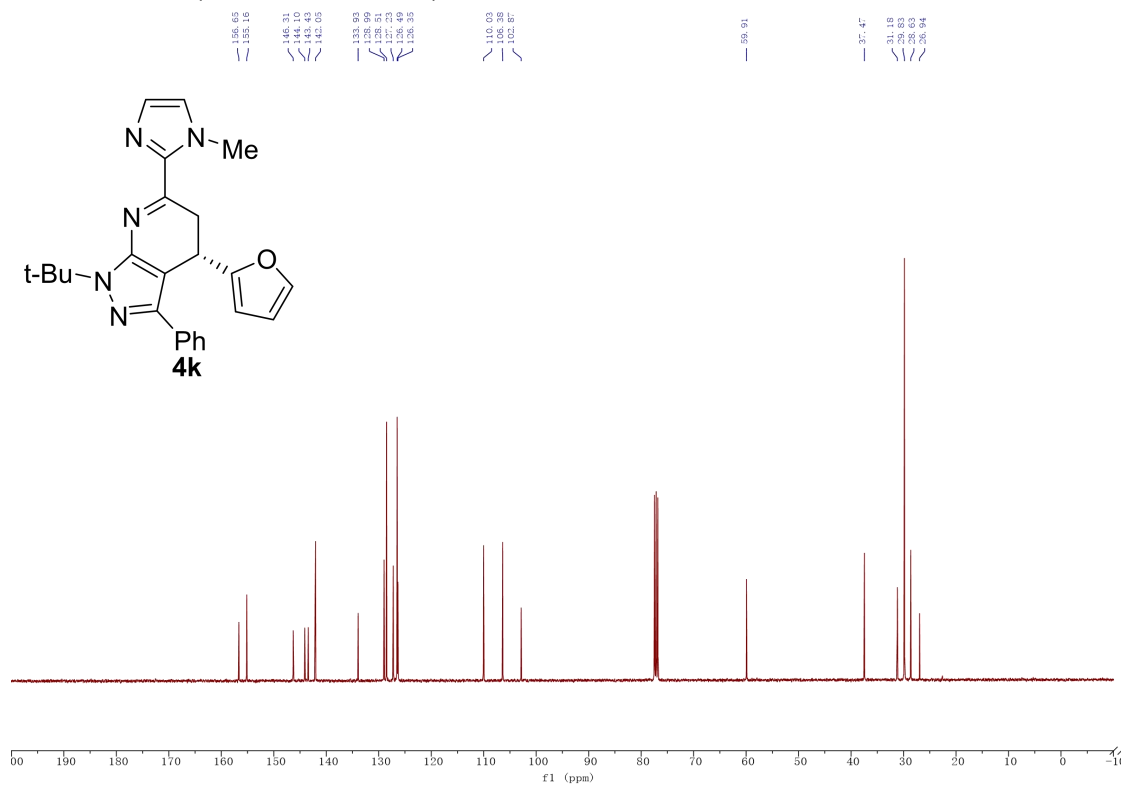





### <sup>1</sup>H NMR-4n (400 MHz, CDCl<sub>3</sub>)

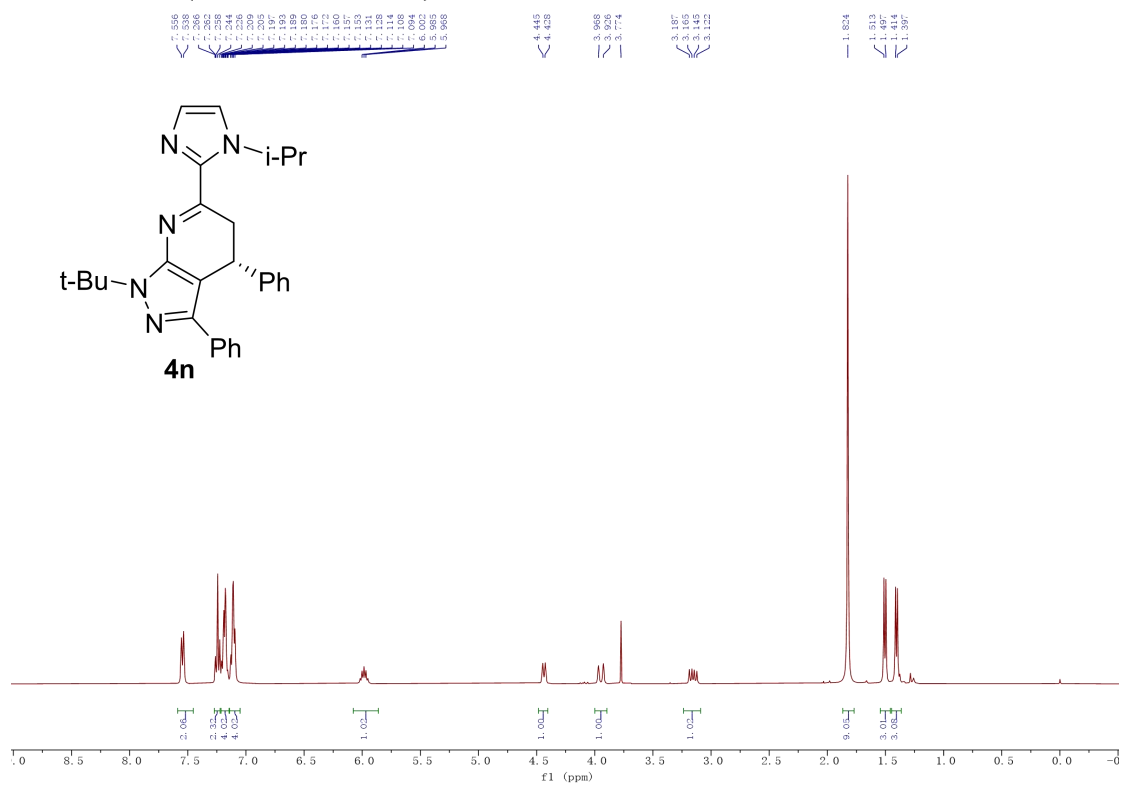

### <sup>13</sup>C NMR-4n (100 MHz, CDCl<sub>3</sub>)

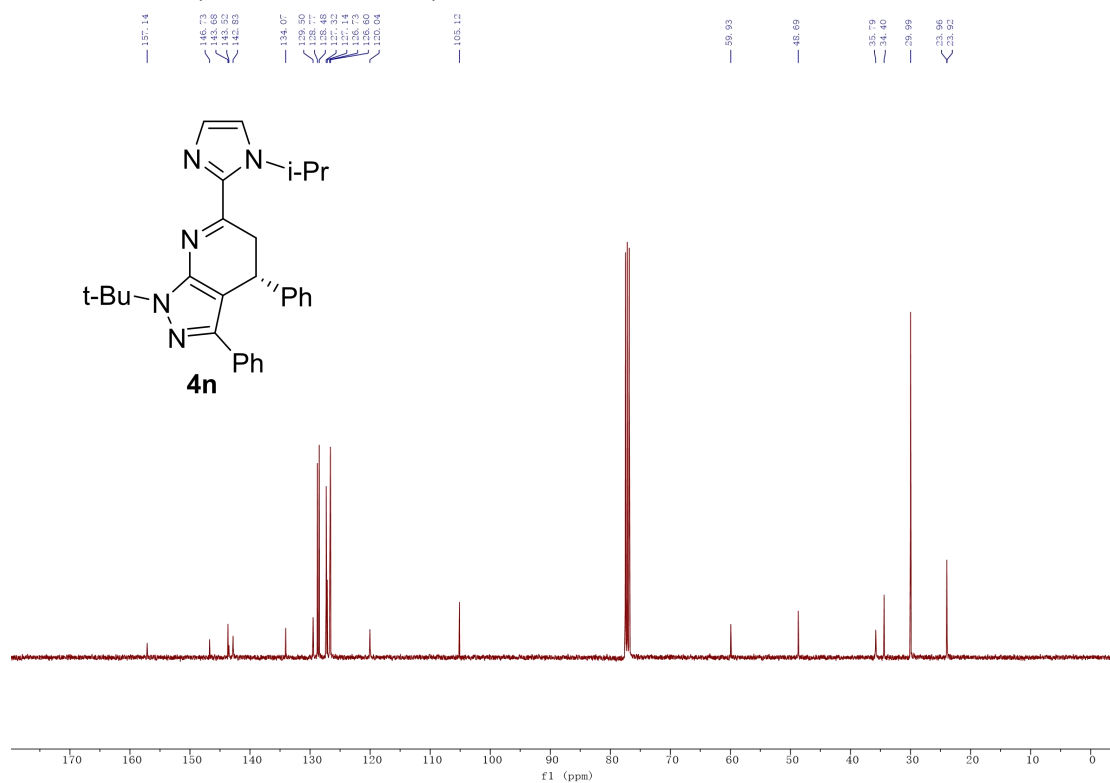



### <sup>1</sup>H NMR-6a (400 MHz, CDCl<sub>3</sub>)

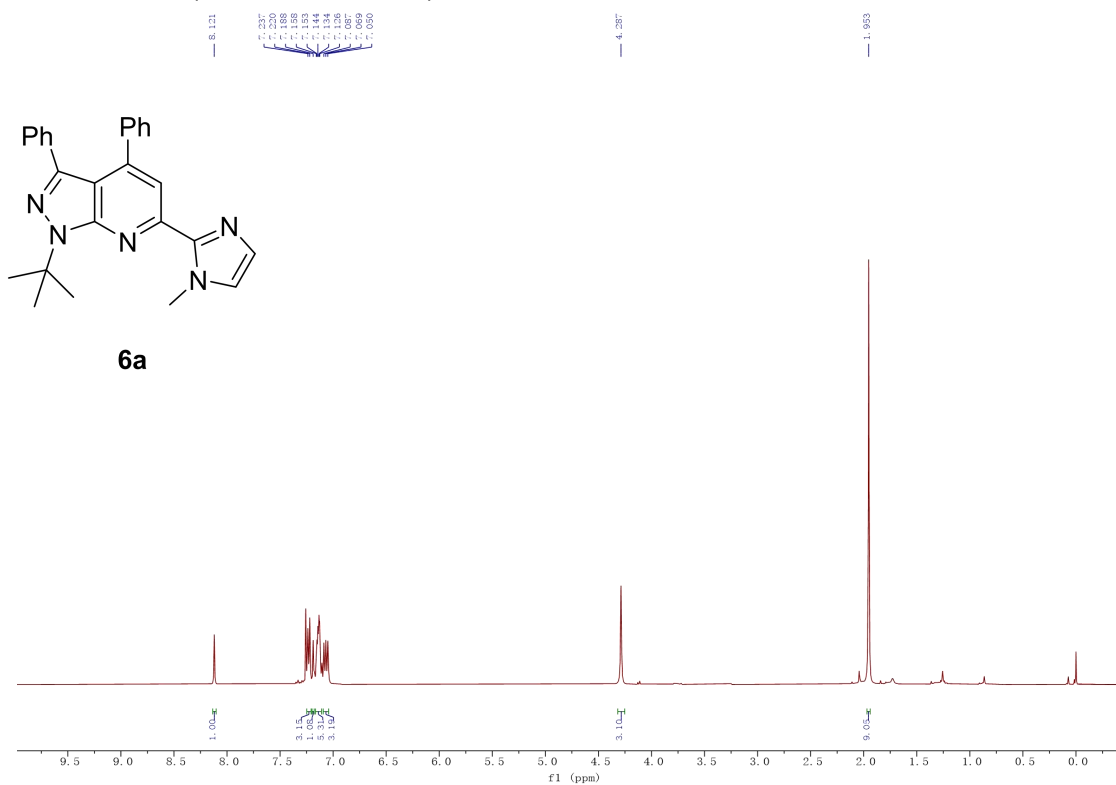

### <sup>13</sup>C NMR-6a (100 MHz, CDCl<sub>3</sub>)

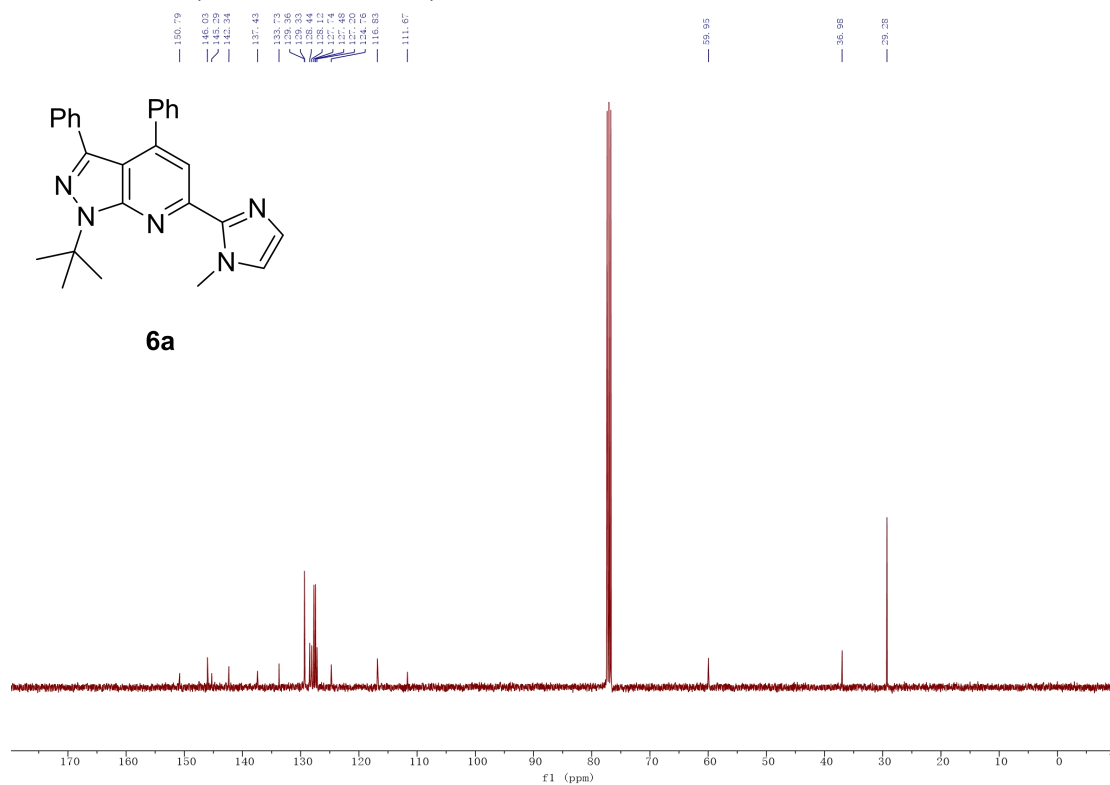

## V Chiral HPLC analysis trace

### racemic-3a

Chromatogram

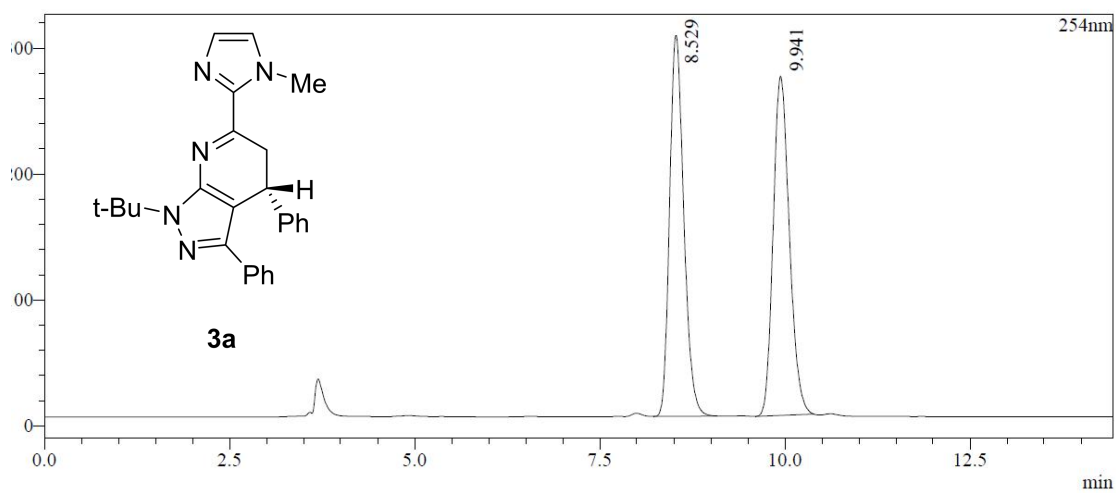

Peak Table

| Peak# | Ret. Time | Area    | Height | Area%   |
|-------|-----------|---------|--------|---------|
| 1     | 8.529     | 4034200 | 302291 | 49.605  |
| 2     | 9.941     | 4098496 | 269366 | 50.395  |
| Total |           | 8132696 | 571657 | 100.000 |

### chiral-3a

Chromatogram

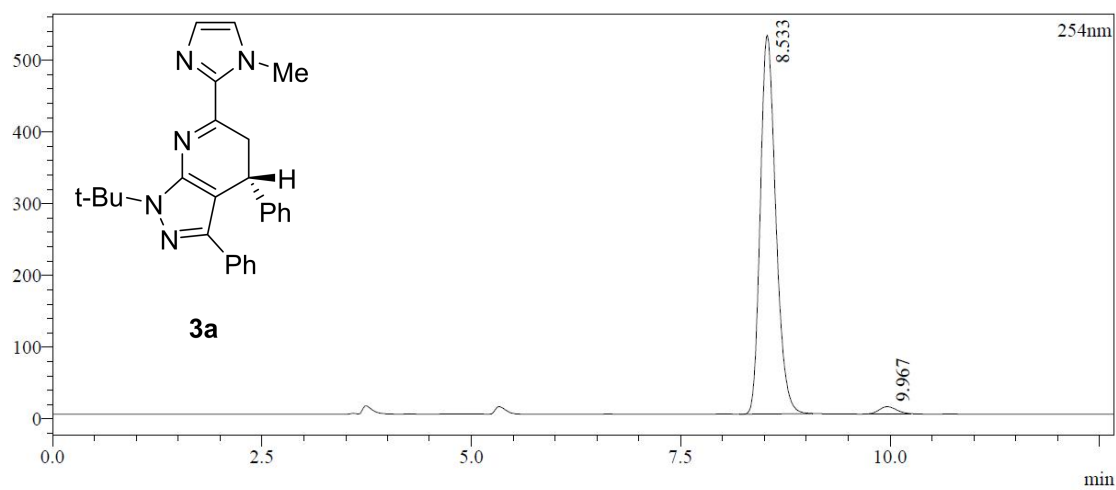

Peak Table

| Peak# | Ret. Time | Area    | Height | Area%   |
|-------|-----------|---------|--------|---------|
| 1     | 8.533     | 6799696 | 528033 | 98.048  |
| 2     | 9.967     | 135407  | 9825   | 1.952   |
| Total |           | 6935103 | 537858 | 100.000 |

## racemic-3b

Chromatogram

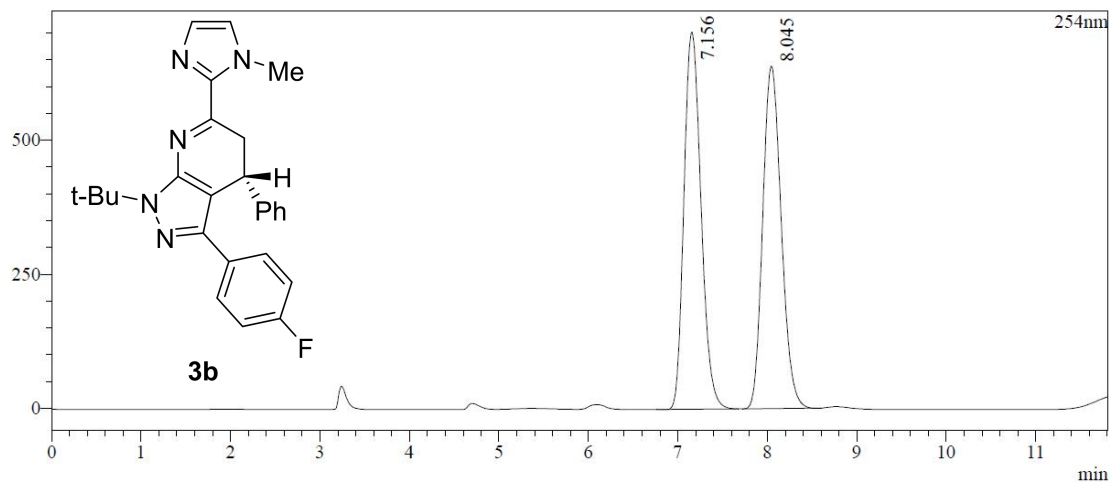

Peak Table

| Peak# | Ret. Time | Area     | Height  | Area%   |
|-------|-----------|----------|---------|---------|
| 1     | 7.156     | 9330869  | 703589  | 50.383  |
| 2     | 8.045     | 9189128  | 638341  | 49.617  |
| Total |           | 18519996 | 1341930 | 100.000 |

## chiral-3b

Chromatogram

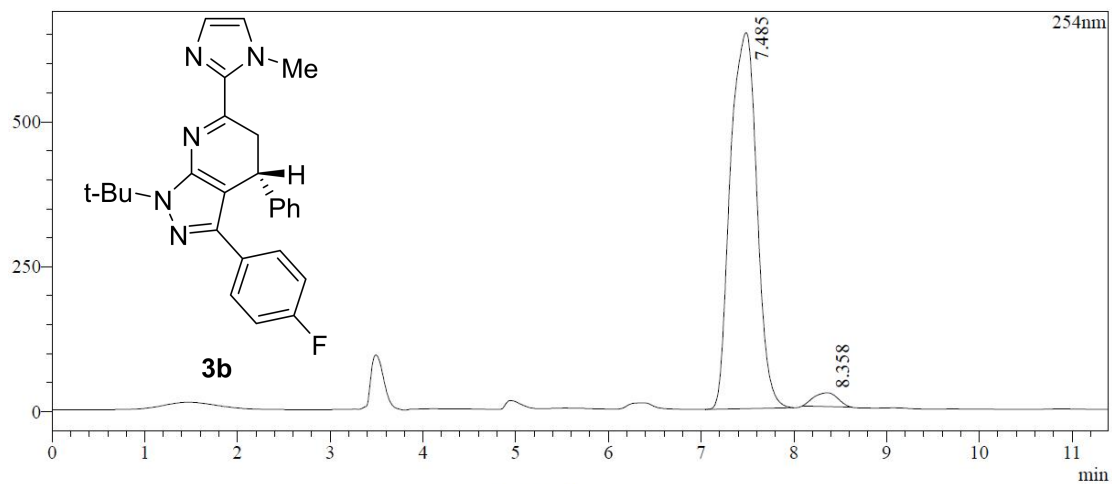

Peak Table

| Peak# | Ret. Time | Area     | Height | Area%   |
|-------|-----------|----------|--------|---------|
| 1     | 7.485     | 12865476 | 648230 | 96.766  |
| 2     | 8.358     | 430021   | 23862  | 3.234   |
| Total |           | 13295497 | 672092 | 100.000 |

## racemic-3c

Chromatogram

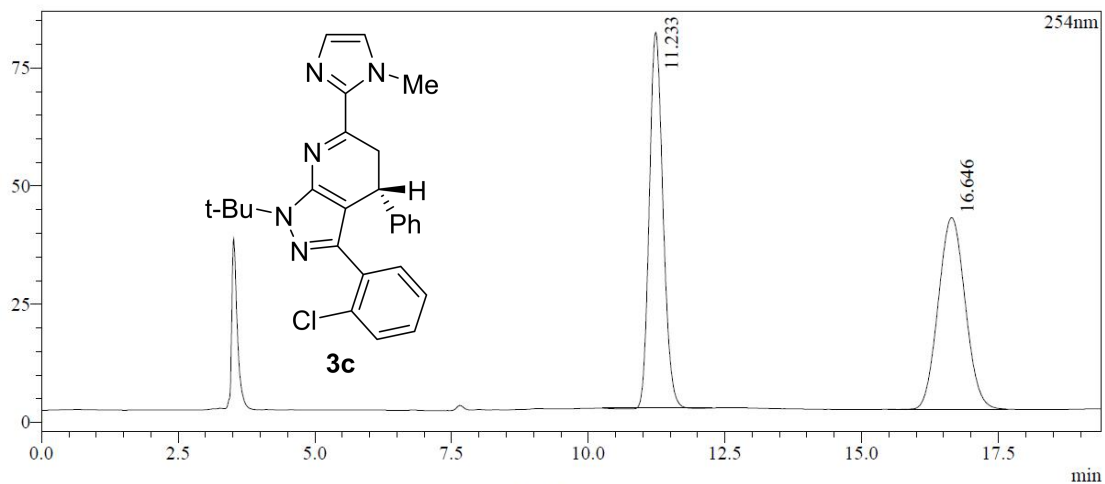

Peak Table

| Peak# | Ret. Time | Area    | Height | Area%   |
|-------|-----------|---------|--------|---------|
| 1     | 11.233    | 1378004 | 79489  | 49.812  |
| 2     | 16.646    | 1388405 | 40535  | 50.188  |
| Total |           | 2766409 | 120024 | 100.000 |

## chiral-3c

Chromatogram

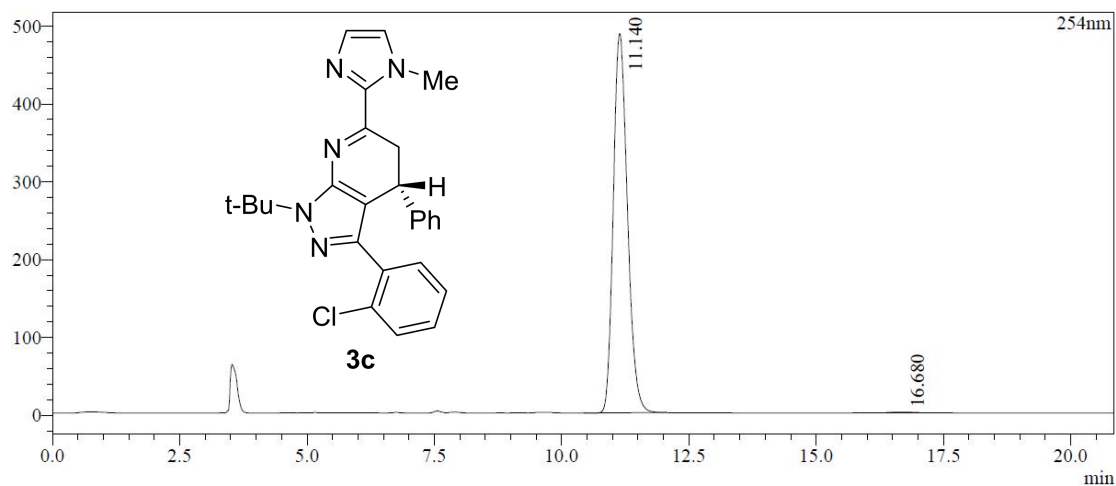

Peak Table

| Peak# | Ret. Time | Area    | Height | Area%   |
|-------|-----------|---------|--------|---------|
| 1     | 11.140    | 9423661 | 487562 | 99.710  |
| 2     | 16.680    | 27408   | 946    | 0.290   |
| Total |           | 9451069 | 488507 | 100.000 |

## racemic-3d

Chromatogram

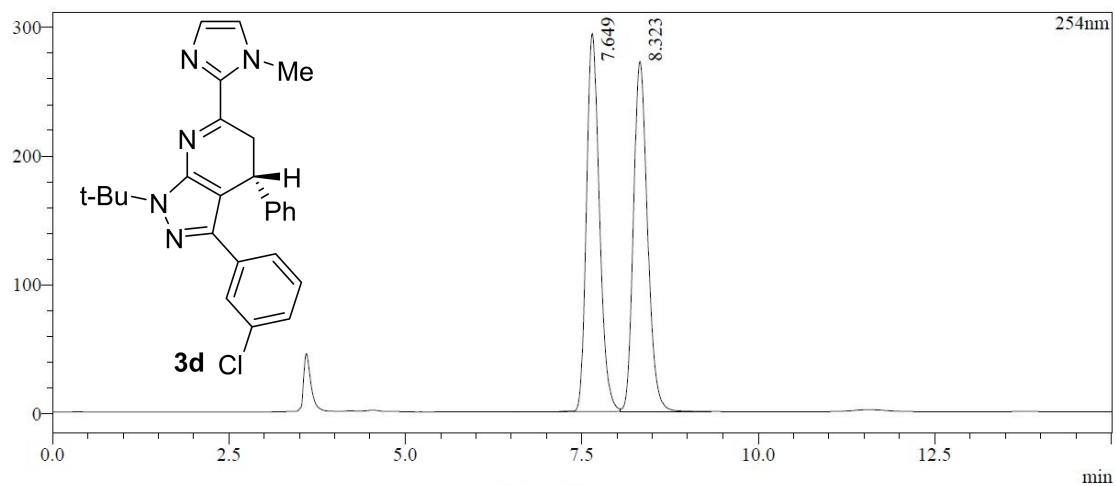

Peak Table

| Peak# | Ret. Time | Area    | Height | Area%   |
|-------|-----------|---------|--------|---------|
| 1     | 7.649     | 3761026 | 293599 | 49.890  |
| 2     | 8.323     | 3777538 | 271860 | 50.110  |
| Total |           | 7538564 | 565459 | 100.000 |

## chiral-3d

Chromatogram

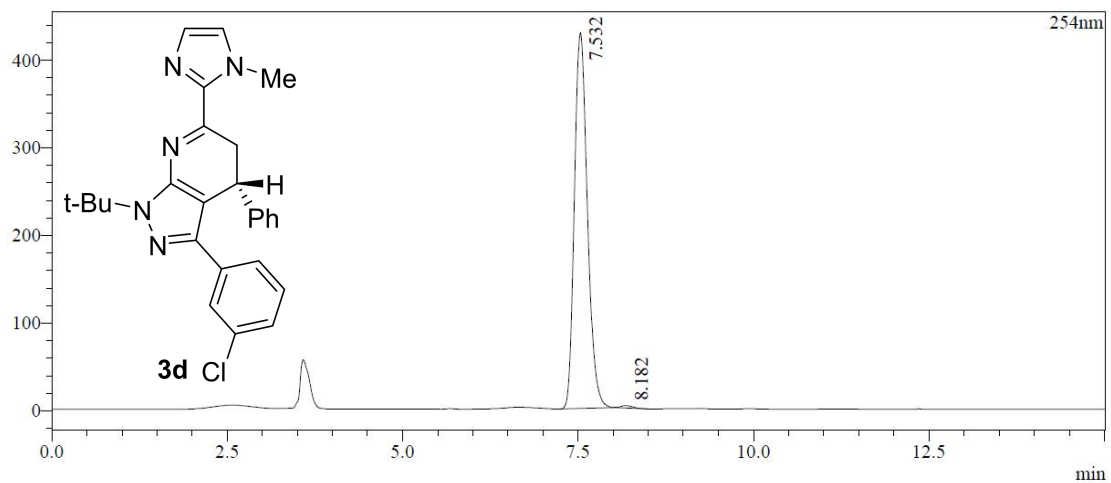

Peak Table

| Peak# | Ret. Time | Area    | Height | Area%   |
|-------|-----------|---------|--------|---------|
| 1     | 7.532     | 5539270 | 429069 | 99.410  |
| 2     | 8.182     | 32875   | 2877   | 0.590   |
| Total |           | 5572146 | 431946 | 100.000 |

## racemic-3e

Chromatogram

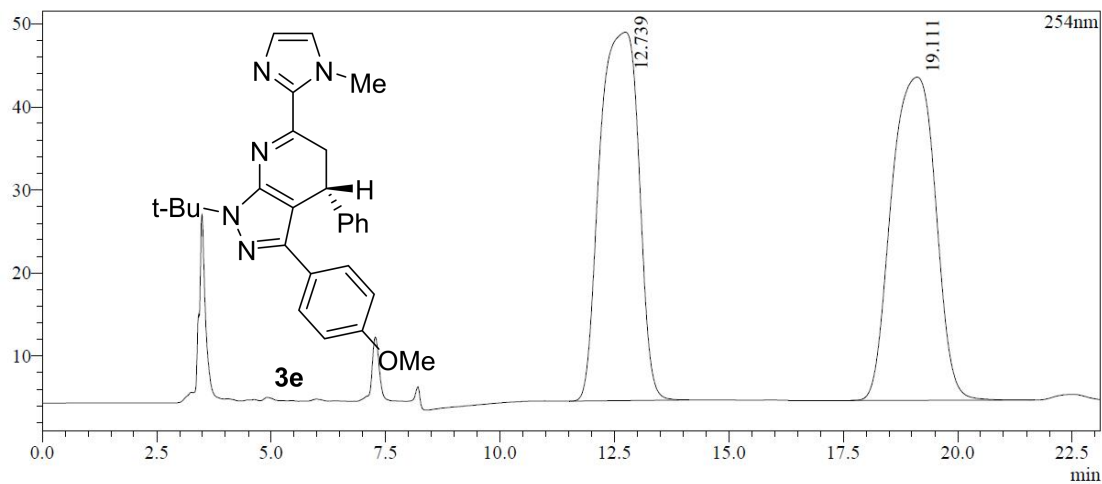

Peak Table

| Peak# | Ret. Time | Area    | Height | Area%   |
|-------|-----------|---------|--------|---------|
| 1     | 12.739    | 2619172 | 44325  | 50.032  |
| 2     | 19.111    | 2615861 | 38890  | 49.968  |
| Total |           | 5235033 | 83215  | 100.000 |

## chiral-3e

Chromatogram

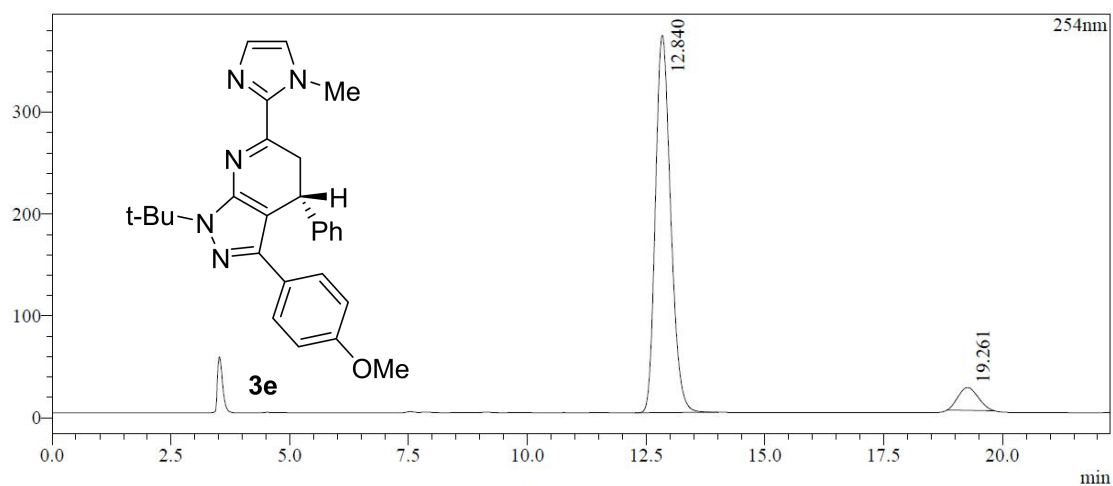

Peak Table

| Peak# | Ret. Time | Area    | Height | Area%   |
|-------|-----------|---------|--------|---------|
| 1     | 12.840    | 8288464 | 370675 | 92.556  |
| 2     | 19.261    | 666628  | 22507  | 7.444   |
| Total |           | 8955092 | 393182 | 100.000 |

## racemic-3f

Chromatogram

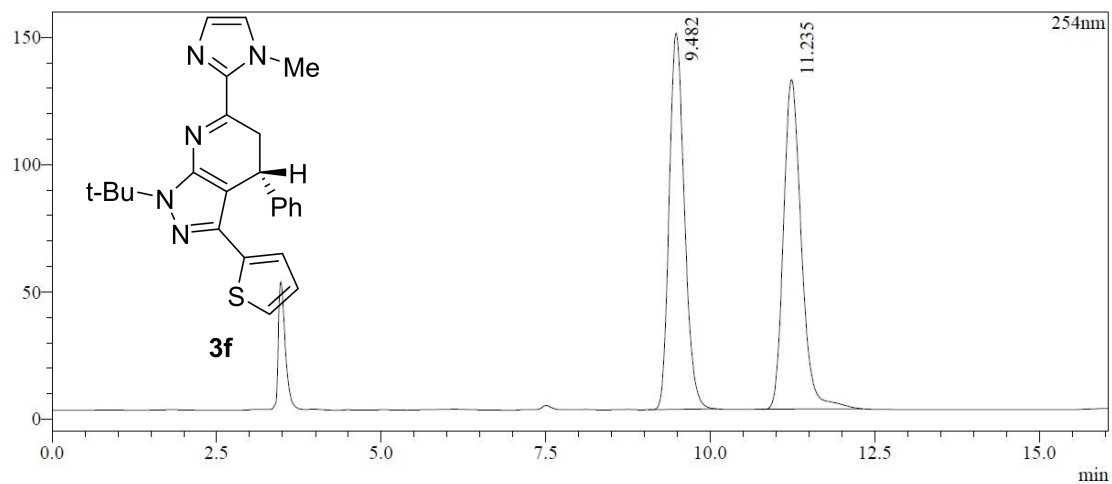

Peak Table

| Peak# | Ret. Time | Area    | Height | Area%   |
|-------|-----------|---------|--------|---------|
| 1     | 9.482     | 2378066 | 147840 | 49.245  |
| 2     | 11.235    | 2450995 | 129419 | 50.755  |
| Total |           | 4829061 | 277260 | 100.000 |

## chiral-3f

Chromatogram

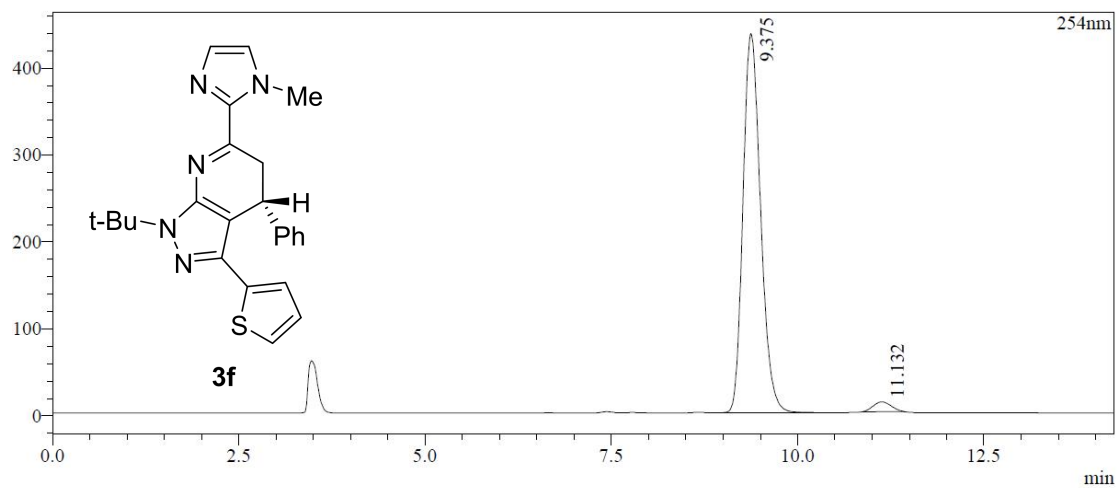

Peak Table

| Peak# | Ret. Time | Area    | Height | Area%   |
|-------|-----------|---------|--------|---------|
| 1     | 9.375     | 7165306 | 436175 | 97.380  |
| 2     | 11.132    | 192759  | 11385  | 2.620   |
| Total |           | 7358065 | 447560 | 100.000 |

## racemic-3g

Chromatogram

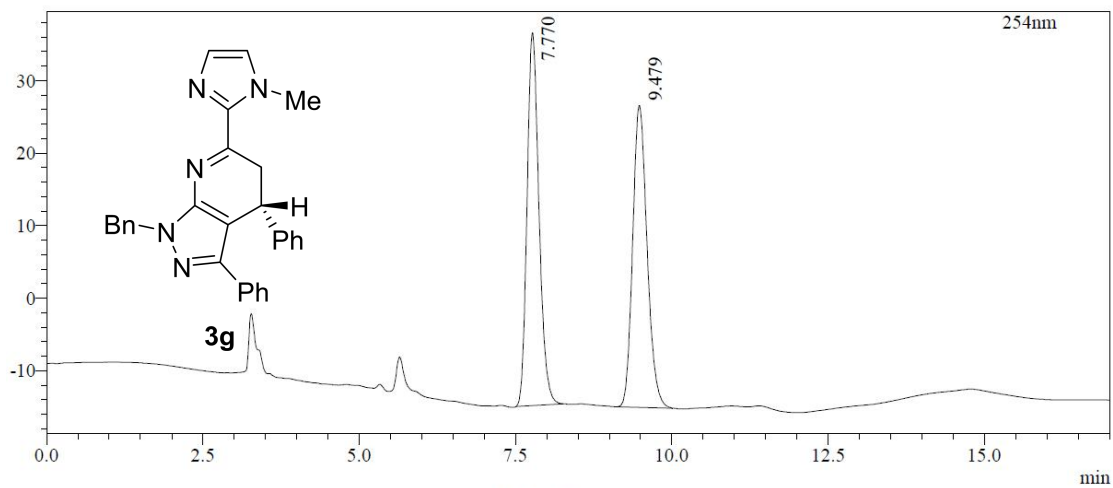

Peak Table

| Peak# | Ret. Time | Area    | Height | Area%   |
|-------|-----------|---------|--------|---------|
| 1     | 7.770     | 682035  | 51410  | 50.539  |
| 2     | 9.479     | 667495  | 41604  | 49.461  |
| Total |           | 1349530 | 93015  | 100.000 |

## chiral-3g

Chromatogram

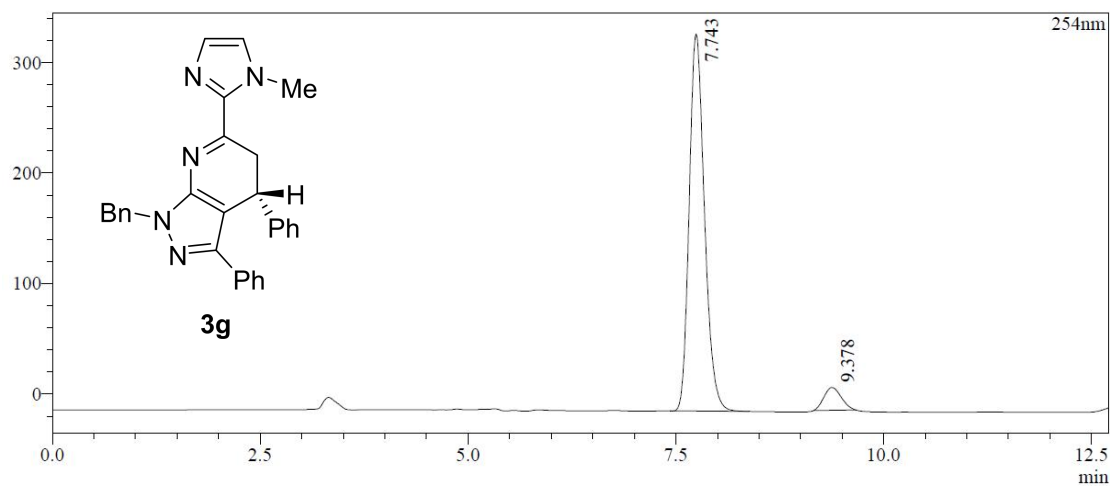

Peak Table

| Peak# | Ret. Time | Area    | Height | Area%   |
|-------|-----------|---------|--------|---------|
| 1     | 7.743     | 4364904 | 341253 | 93.578  |
| 2     | 9.378     | 299572  | 20594  | 6.422   |
| Total |           | 4664476 | 361847 | 100.000 |



## racemic-3h

Chromatogram

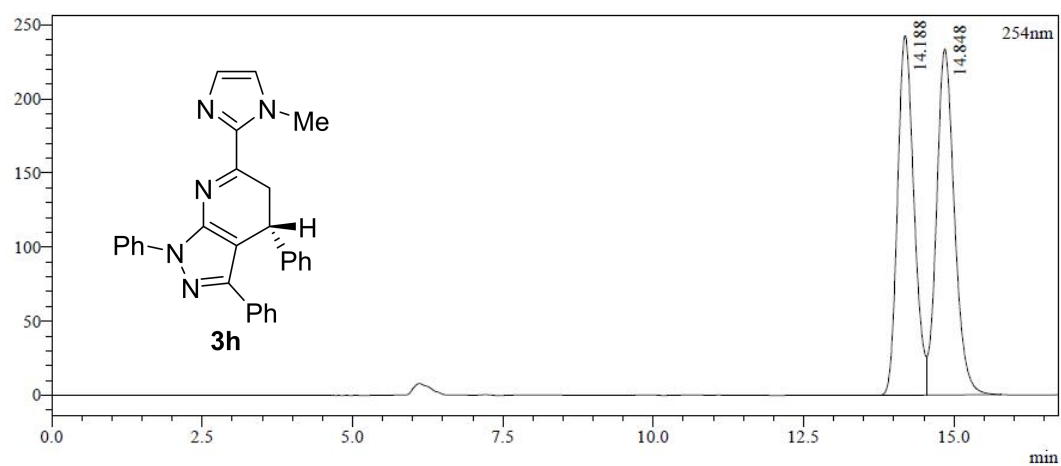

Peak Table

| Peak# | Ret. Time | Area    | Height | Area%   |
|-------|-----------|---------|--------|---------|
| 1     | 14.188    | 4613102 | 242707 | 48.767  |
| 2     | 14.848    | 4846341 | 233485 | 51.233  |
|       |           | 9459443 | 476192 | 100.000 |

## chiral-3h

Chromatogram

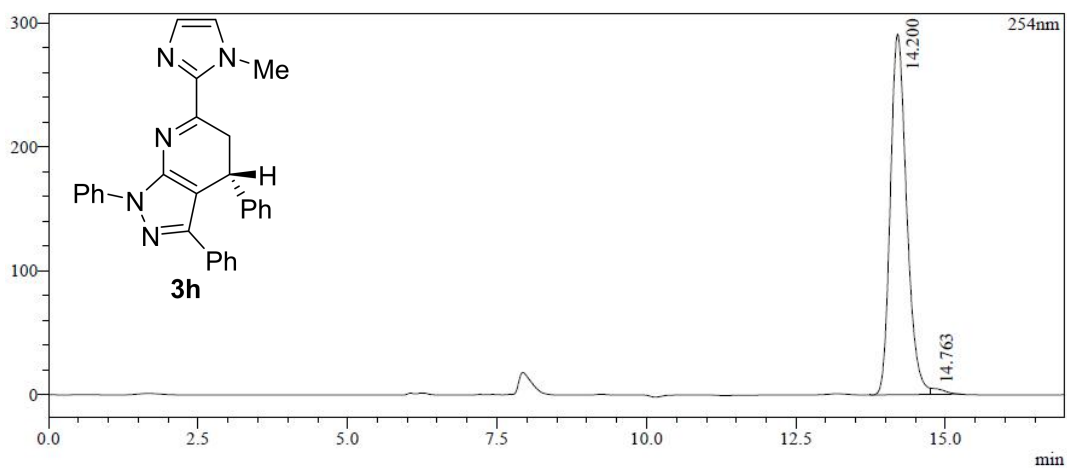

Peak Table

| Peak# | Ret. Time | Area    | Height | Area%   |
|-------|-----------|---------|--------|---------|
| 1     | 14.200    | 5521940 | 290967 | 98.665  |
| 2     | 14.763    | 74707   | 5004   | 1.335   |
|       |           | 5596647 | 295972 | 100.000 |

## racemic-3i

Chromatogram

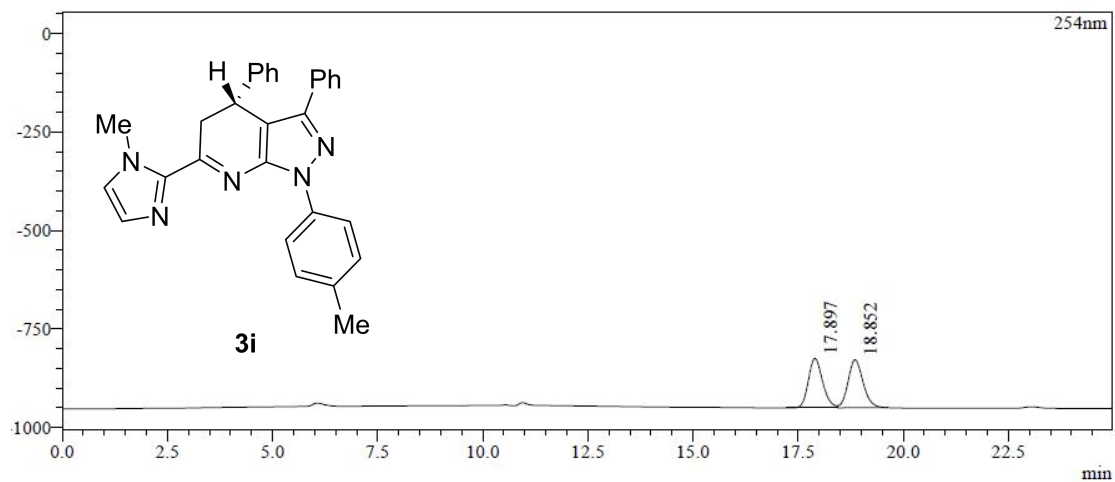

Peak Table

| Peak# | Ret. Time | Area    | Height | Area%   |
|-------|-----------|---------|--------|---------|
| 1     | 17.897    | 2930501 | 124833 | 49.438  |
| 2     | 18.852    | 2997076 | 121247 | 50.562  |
|       |           | 5927577 | 246080 | 100.000 |

## chiral-3i

Chromatogram

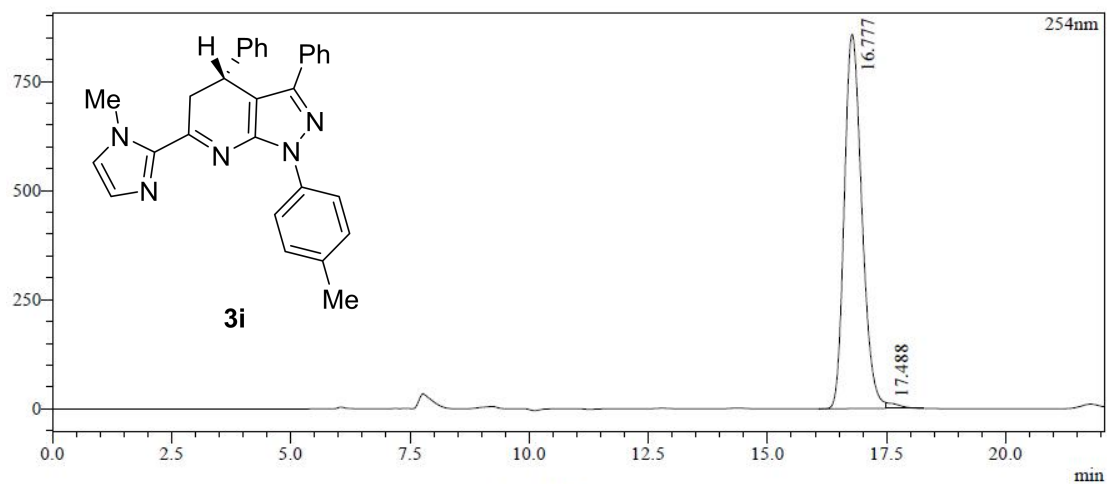

Peak Table

| Peak# | Ret. Time | Area     | Height | Area%   |
|-------|-----------|----------|--------|---------|
| 1     | 16.777    | 21902449 | 857021 | 98.839  |
| 2     | 17.488    | 257326   | 13984  | 1.161   |
|       |           | 22159774 | 871004 | 100.000 |

## racemic-3j

Chromatogram

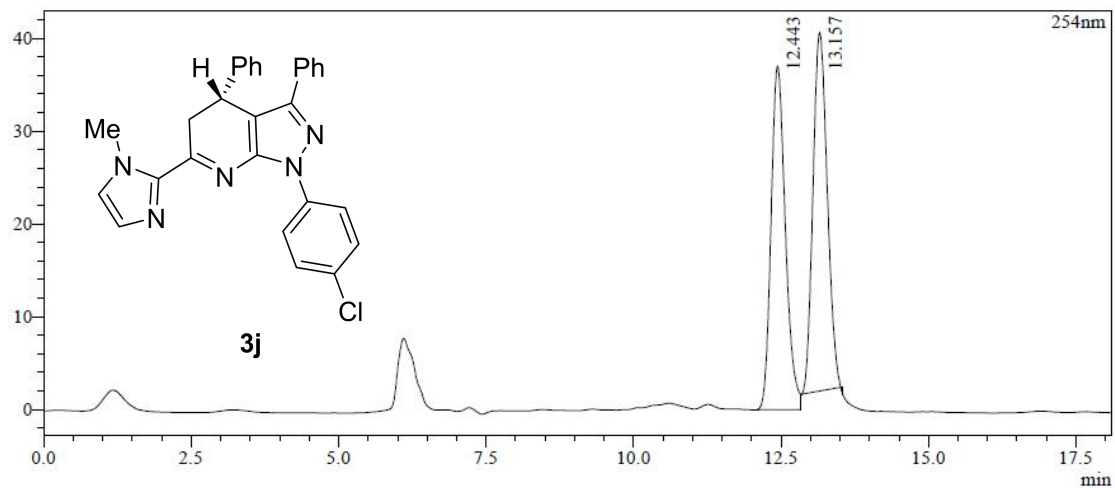

Peak Table

| Peak# | Ret. Time | Area    | Height | Area%   |
|-------|-----------|---------|--------|---------|
| 1     | 12.443    | 627162  | 37027  | 49.105  |
| 2     | 13.157    | 650020  | 38659  | 50.895  |
|       |           | 1277182 | 75685  | 100.000 |

## chiral-3j

Chromatogram

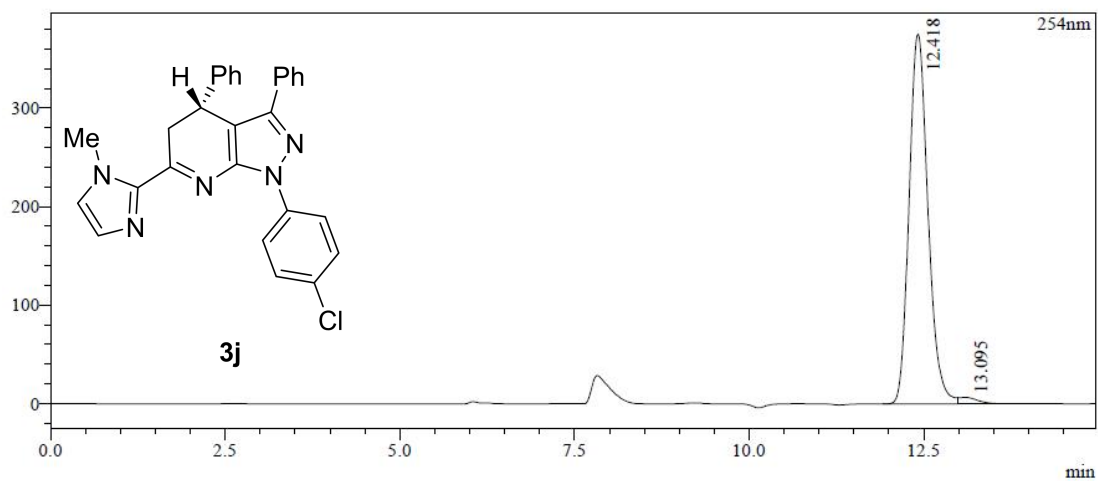

Peak Table

| Peak# | Ret. Time | Area    | Height | Area%   |
|-------|-----------|---------|--------|---------|
| 1     | 12.418    | 7069965 | 375266 | 98.398  |
| 2     | 13.095    | 115104  | 6356   | 1.602   |
|       |           | 7185069 | 381622 | 100.000 |

## racemic-3k

Chromatogram

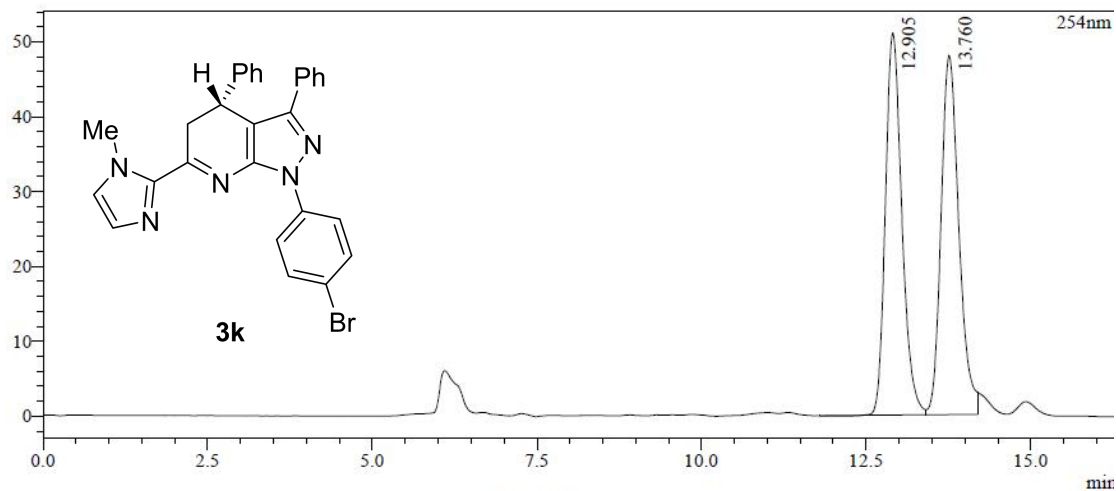

Peak Table

| Peak# | Ret. Time | Area    | Height | Area%   |
|-------|-----------|---------|--------|---------|
| 1     | 12.905    | 886822  | 51045  | 49.572  |
| 2     | 13.760    | 902121  | 47953  | 50.428  |
|       |           | 1788943 | 98998  | 100.000 |

## chiral-3k

Chromatogram

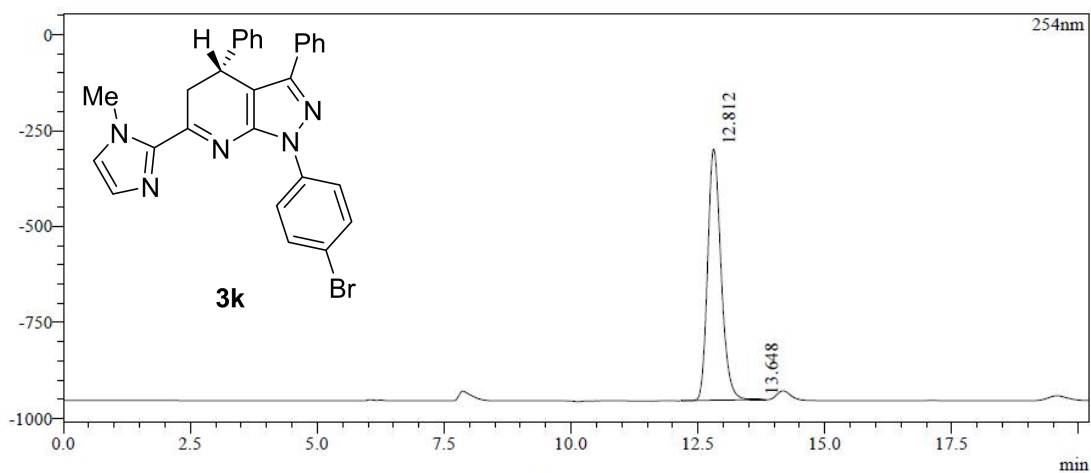

Peak Table

| Peak# | Ret. Time | Area     | Height | Area%   |
|-------|-----------|----------|--------|---------|
| 1     | 12.812    | 12018362 | 654354 | 99.736  |
| 2     | 13.648    | 31772    | 2355   | 0.264   |
|       |           | 12050135 | 656708 | 100.000 |

## racemic-3l

Chromatogram

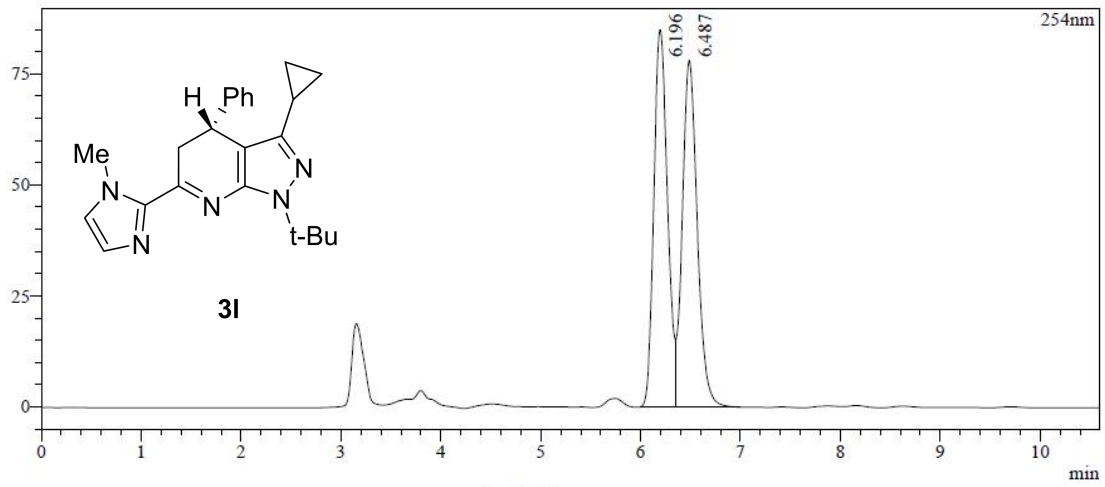

254nm

| Peak# | Ret. Time | Area    | Height | Area%   |
|-------|-----------|---------|--------|---------|
| 1     | 6.196     | 807894  | 84916  | 49.885  |
| 2     | 6.487     | 811630  | 78106  | 50.115  |
|       |           | 1619524 | 163022 | 100.000 |

## chiral-3l

Chromatogram

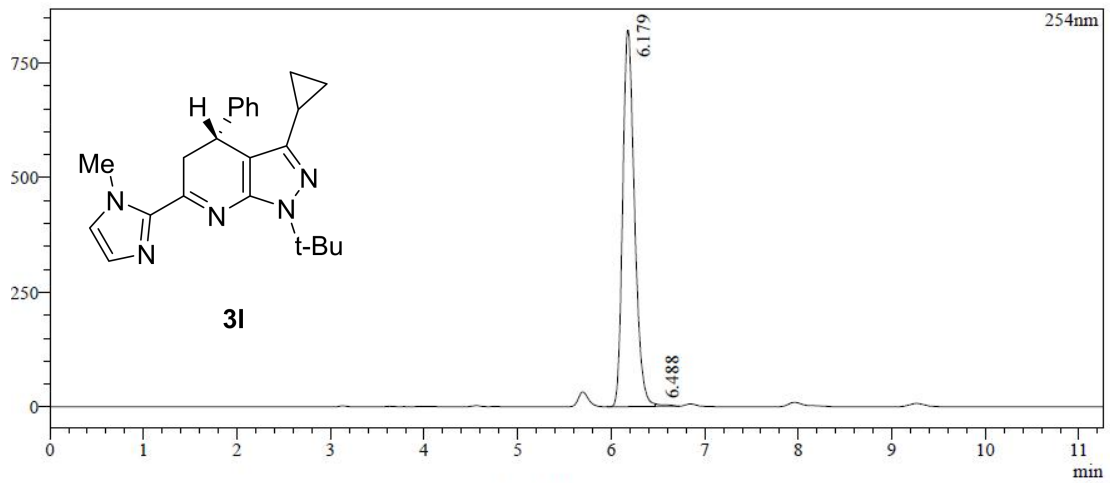

254nm

| Peak# | Ret. Time | Area    | Height | Area%   |
|-------|-----------|---------|--------|---------|
| 1     | 6.179     | 7210355 | 820607 | 99.502  |
| 2     | 6.488     | 36096   | 4917   | 0.498   |
|       |           | 7246450 | 825524 | 100.000 |

## racemic-3m

Chromatogram

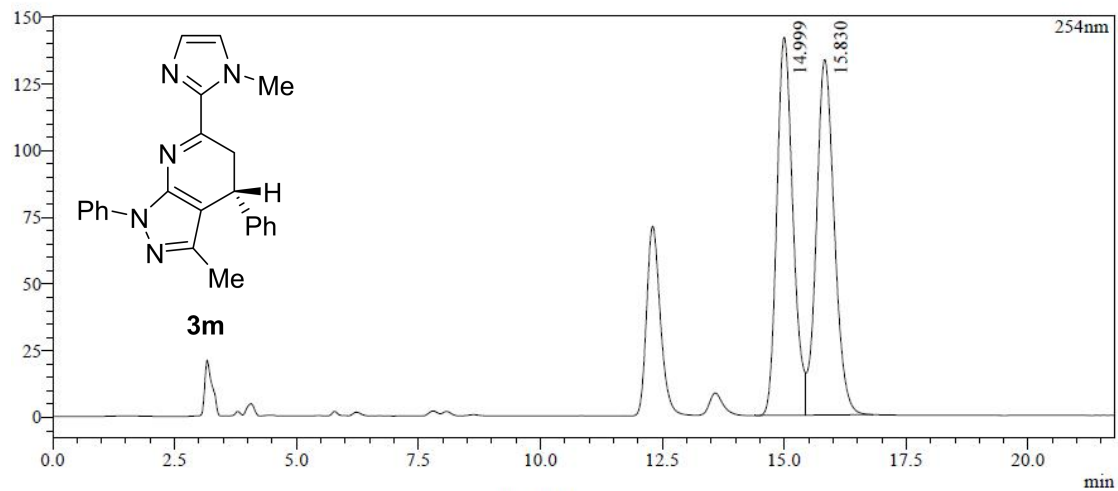

Peak Table

| Peak# | Ret. Time | Area    | Height | Area%   |
|-------|-----------|---------|--------|---------|
| 1     | 14.999    | 3266869 | 141801 | 48.922  |
| 2     | 15.830    | 3410774 | 133274 | 51.078  |
|       |           | 6677642 | 275075 | 100.000 |

## chiral-3m

Chromatogram

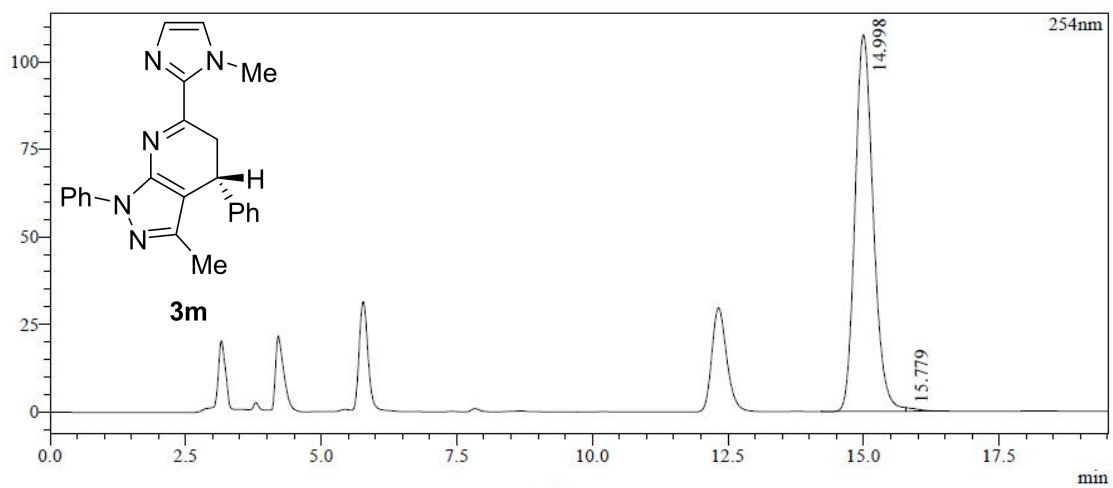

Peak Table

| Peak# | Ret. Time | Area    | Height | Area%   |
|-------|-----------|---------|--------|---------|
| 1     | 14.998    | 2514134 | 107641 | 99.418  |
| 2     | 15.779    | 14712   | 1035   | 0.582   |
|       |           | 2528845 | 108676 | 100.000 |

## racemic-3n

Chromatogram

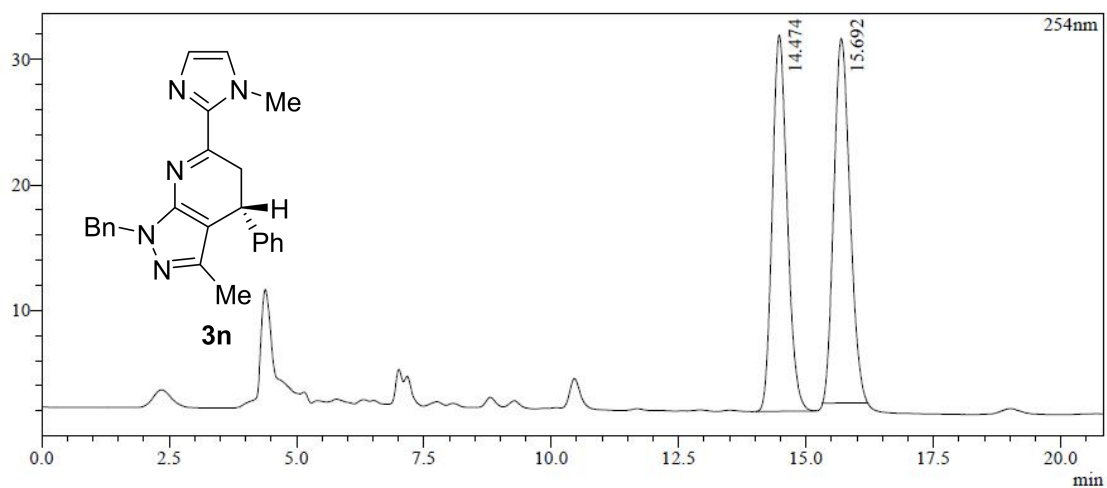

Peak Table

| Peak# | Ret. Time | Area    | Height | Area%   |
|-------|-----------|---------|--------|---------|
| 1     | 14.474    | 613409  | 29968  | 48.942  |
| 2     | 15.692    | 639932  | 29019  | 51.058  |
|       |           | 1253341 | 58987  | 100.000 |

## chiral-3n

Chromatogram

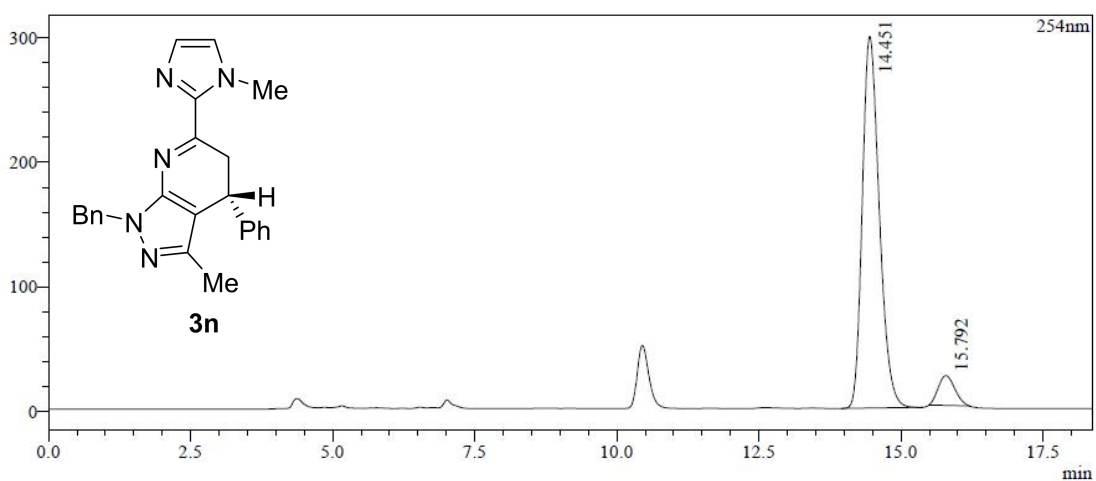

Peak Table

| Peak# | Ret. Time | Area    | Height | Area%   |
|-------|-----------|---------|--------|---------|
| 1     | 14.451    | 6200253 | 298373 | 92.711  |
| 2     | 15.792    | 487503  | 23950  | 7.289   |
|       |           | 6687757 | 322323 | 100.000 |

## racemic-4a

Chromatogram

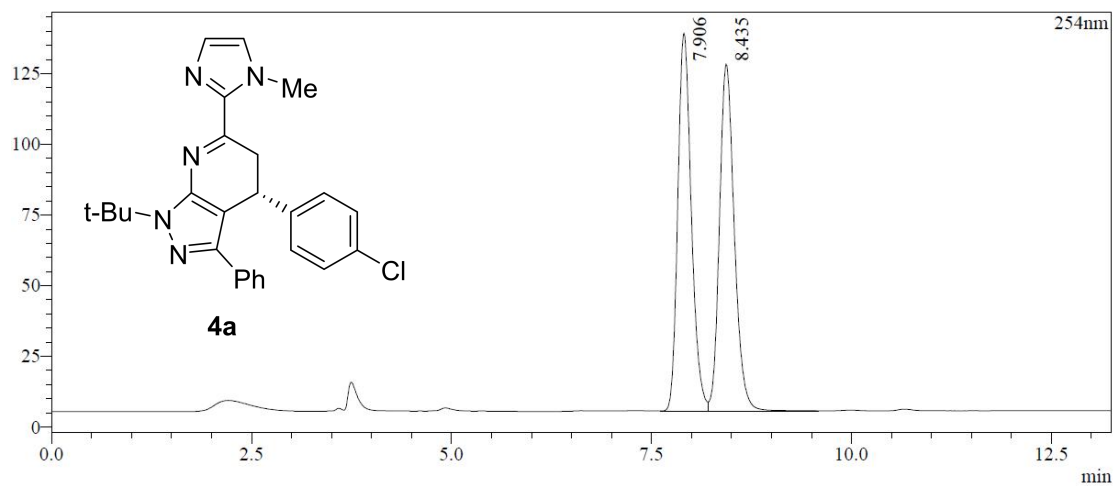

Peak Table

| Peak# | Ret. Time | Area    | Height | Area%   |
|-------|-----------|---------|--------|---------|
| 1     | 7.906     | 1572401 | 133604 | 49.822  |
| 2     | 8.435     | 1583627 | 122618 | 50.178  |
| Total |           | 3156028 | 256222 | 100.000 |

## chiral-4a

Chromatogram

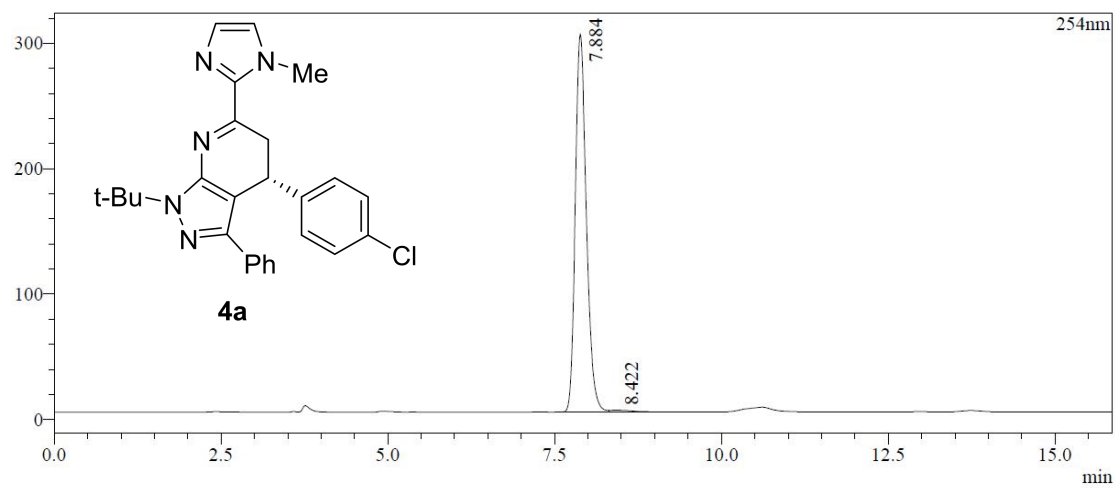

Peak Table

| Peak# | Ret. Time | Area    | Height | Area%   |
|-------|-----------|---------|--------|---------|
| 1     | 7.884     | 3466392 | 301177 | 99.172  |
| 2     | 8.422     | 28944   | 1433   | 0.828   |
| Total |           | 3495336 | 302610 | 100.000 |



## racemic-4b

Chromatogram

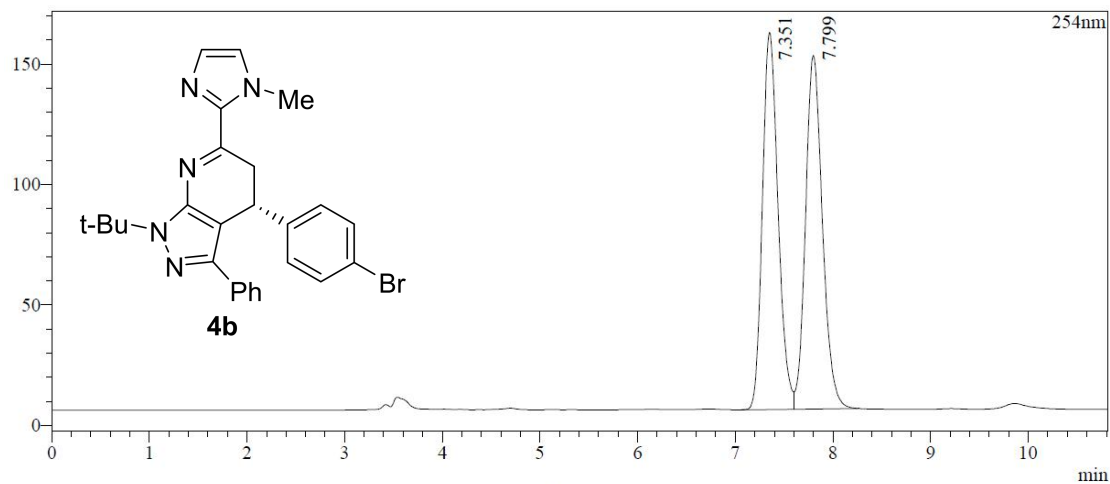

Peak Table

| Peak# | Ret. Time | Area    | Height | Area%   |
|-------|-----------|---------|--------|---------|
| 1     | 7.351     | 1741083 | 156490 | 49.644  |
| 2     | 7.799     | 1766028 | 146682 | 50.356  |
| Total |           | 3507110 | 303172 | 100.000 |

## chiral-4b

Chromatogram

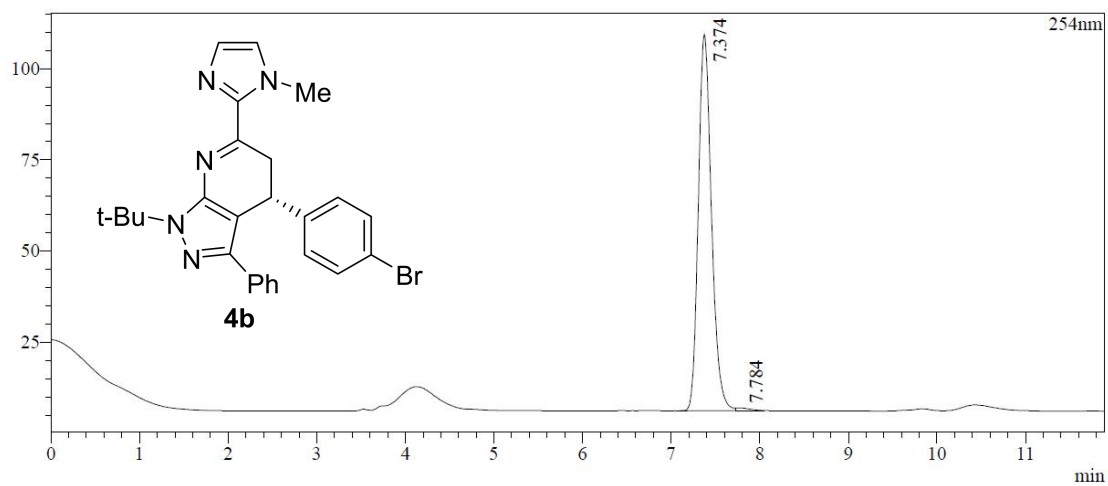

Peak Table

| Peak# | Ret. Time | Area    | Height | Area%   |
|-------|-----------|---------|--------|---------|
| 1     | 7.374     | 1068662 | 103215 | 99.328  |
| 2     | 7.784     | 7227    | 709    | 0.672   |
| Total |           | 1075889 | 103924 | 100.000 |

## racemic-4c

Chromatogram

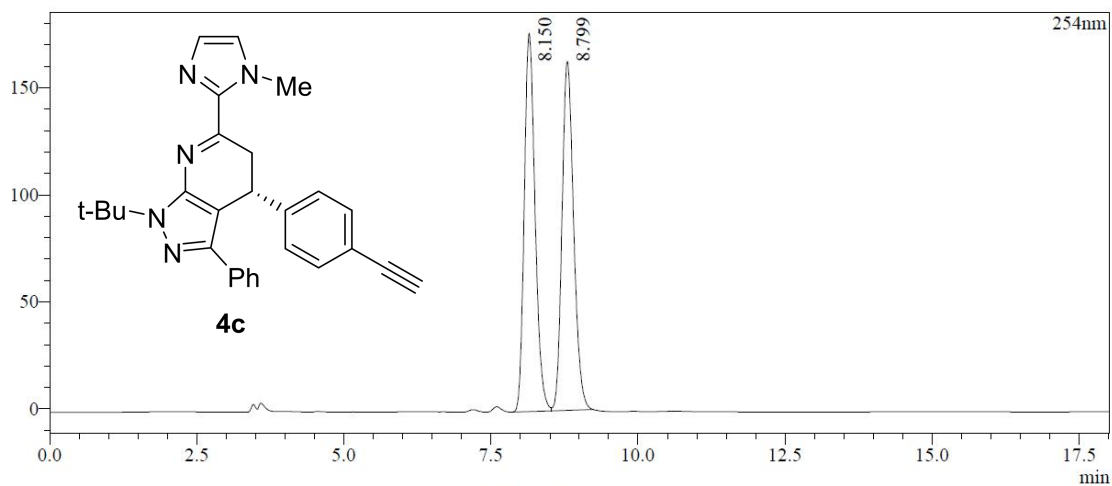

Peak Table

| Peak# | Ret. Time | Area    | Height | Area%   |
|-------|-----------|---------|--------|---------|
| 1     | 8.150     | 2262010 | 176620 | 50.203  |
| 2     | 8.799     | 2243673 | 162941 | 49.797  |
| Total |           | 4505683 | 339561 | 100.000 |

## chiral-4c

Chromatogram

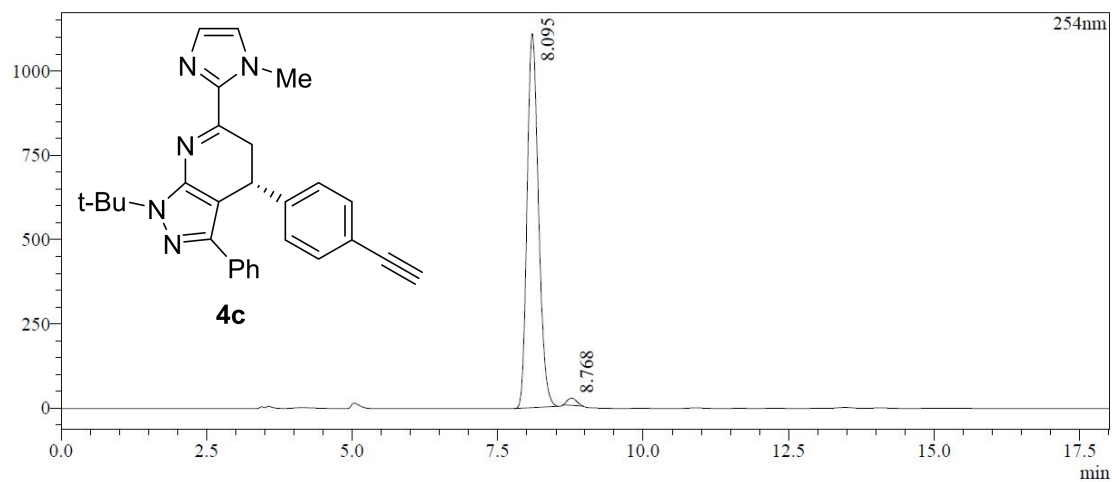

Peak Table

| Peak# | Ret. Time | Area     | Height  | Area%   |
|-------|-----------|----------|---------|---------|
| 1     | 8.095     | 15120055 | 1109263 | 98.442  |
| 2     | 8.768     | 239235   | 21565   | 1.558   |
| Total |           | 15359290 | 1130828 | 100.000 |

## racemic-4d

Chromatogram

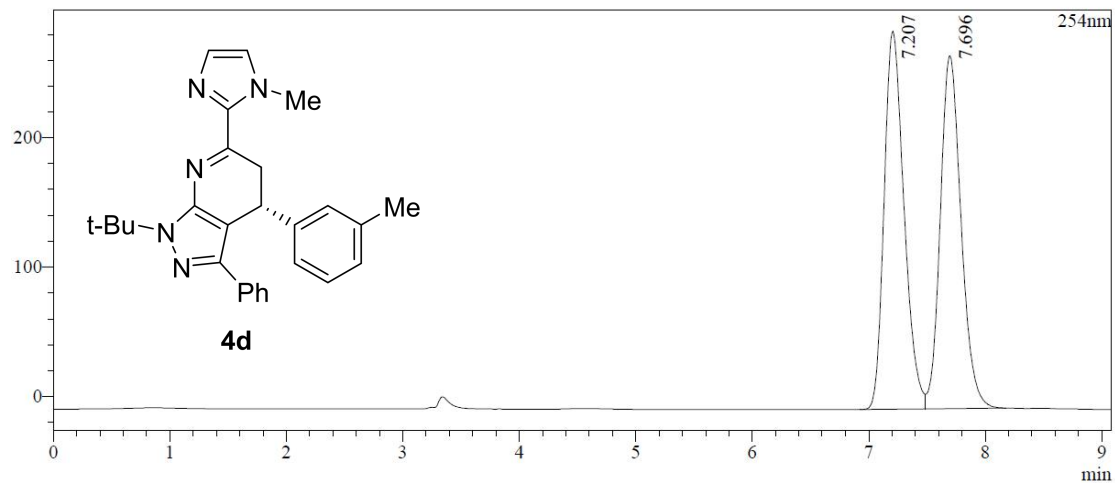

Peak Table

| Peak# | Ret. Time | Area    | Height | Area%   |
|-------|-----------|---------|--------|---------|
| 1     | 7.207     | 3466104 | 292344 | 50.560  |
| 2     | 7.696     | 3389256 | 272675 | 49.440  |
| Total |           | 6855360 | 565019 | 100.000 |

## chiral-4d

Chromatogram

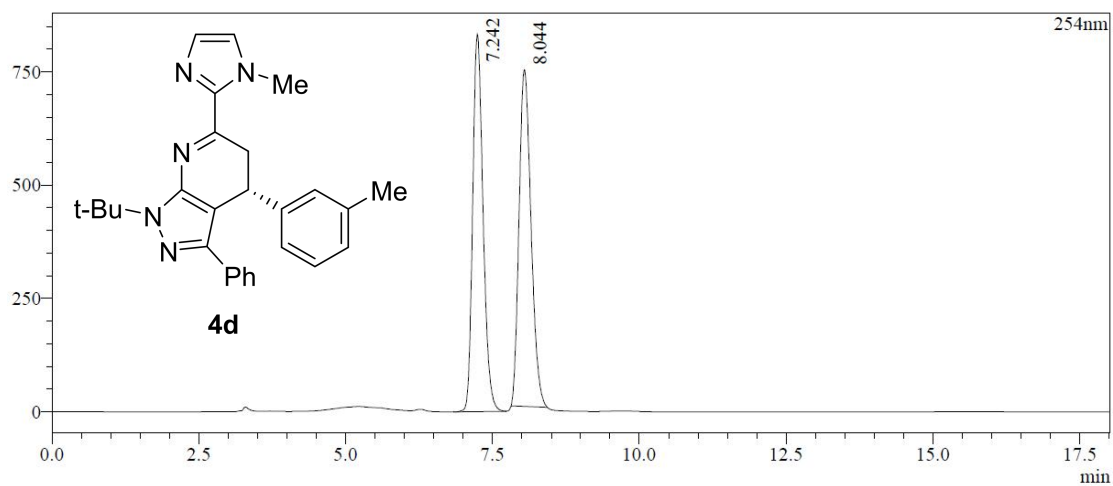

Peak Table

| Peak# | Ret. Time | Area     | Height  | Area%   |
|-------|-----------|----------|---------|---------|
| 1     | 7.242     | 10242127 | 832767  | 49.266  |
| 2     | 8.044     | 10547434 | 742323  | 50.734  |
| Total |           | 20789560 | 1575089 | 100.000 |

## racemic-4e

Chromatogram

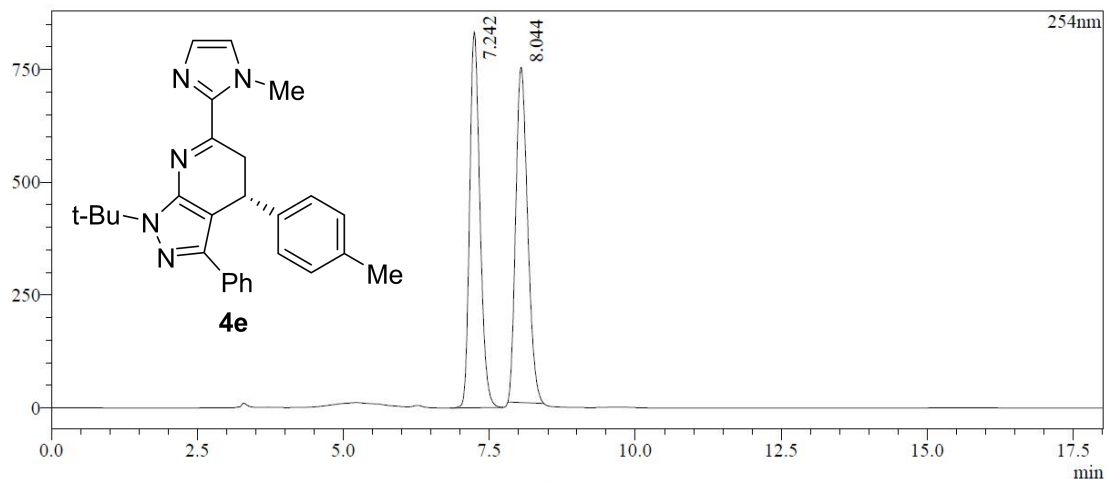

Peak Table

| Peak# | Ret. Time | Area     | Height  | Area%   |
|-------|-----------|----------|---------|---------|
| 1     | 7.242     | 10242127 | 832767  | 49.266  |
| 2     | 8.044     | 10547434 | 742323  | 50.734  |
| Total |           | 20789560 | 1575089 | 100.000 |

## chiral-4e

Chromatogram

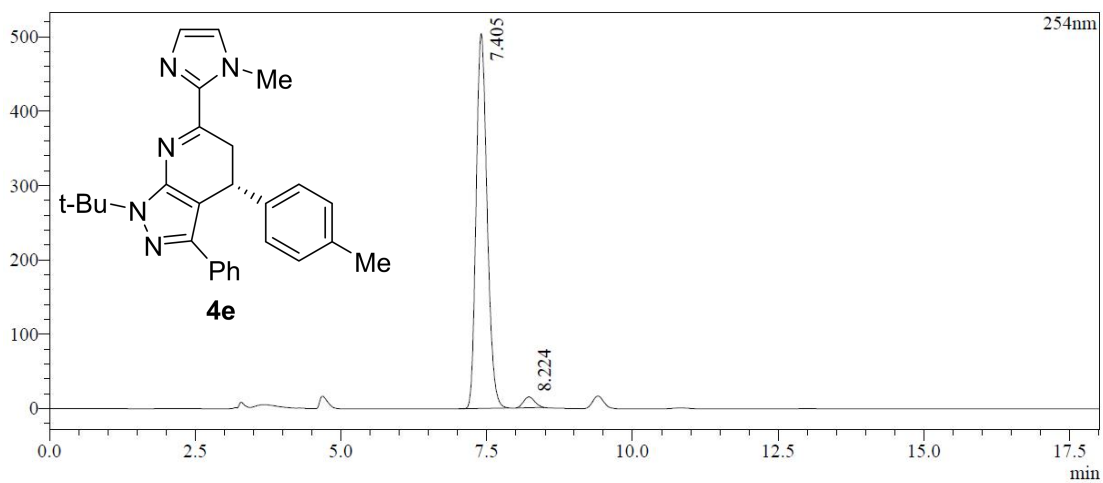

Peak Table

| Peak# | Ret. Time | Area    | Height | Area%   |
|-------|-----------|---------|--------|---------|
| 1     | 7.405     | 6594510 | 504106 | 97.170  |
| 2     | 8.224     | 192045  | 14495  | 2.830   |
| Total |           | 6786555 | 518600 | 100.000 |

## racemic-4f

Chromatogram

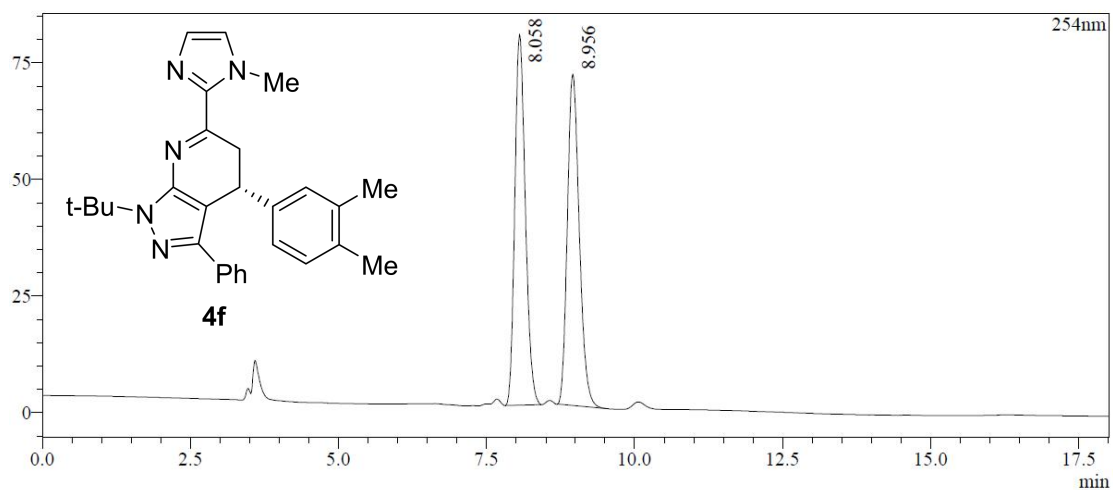

Peak Table

| Peak# | Ret. Time | Area    | Height | Area%   |
|-------|-----------|---------|--------|---------|
| 1     | 8.058     | 984102  | 79438  | 49.722  |
| 2     | 8.956     | 995096  | 71035  | 50.278  |
| Total |           | 1979198 | 150473 | 100.000 |

## chiral-4f

Chromatogram

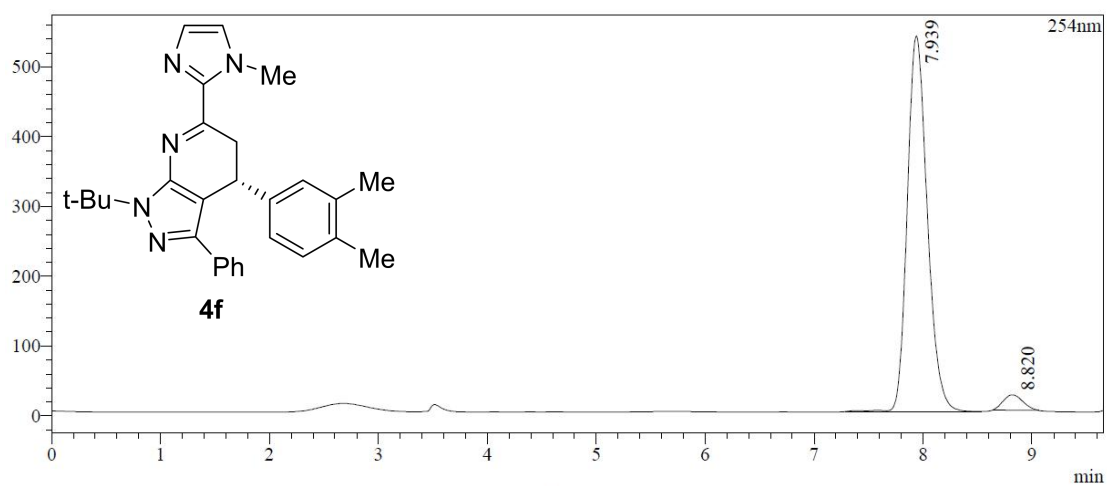

Peak Table

| Peak# | Ret. Time | Area    | Height | Area%   |
|-------|-----------|---------|--------|---------|
| 1     | 7.939     | 6879353 | 537982 | 96.195  |
| 2     | 8.820     | 272097  | 21942  | 3.805   |
| Total |           | 7151450 | 559924 | 100.000 |

## racemic-4g

Chromatogram

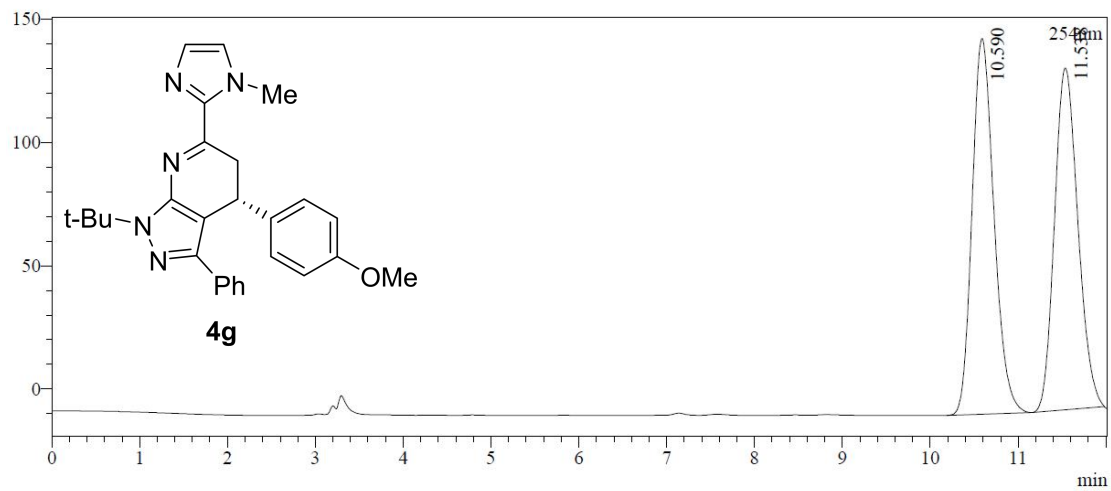

Peak Table

| Peak# | Ret. Time | Area    | Height | Area%   |
|-------|-----------|---------|--------|---------|
| 1     | 10.590    | 2630948 | 152303 | 50.649  |
| 2     | 11.538    | 2563513 | 138504 | 49.351  |
| Total |           | 5194462 | 290807 | 100.000 |

## chiral-4g

Chromatogram

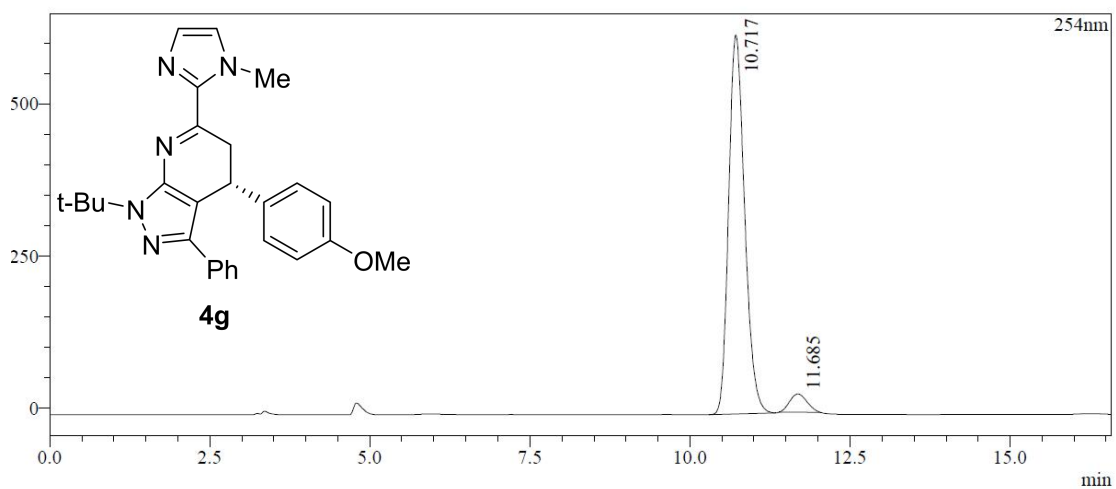

Peak Table

| Peak# | Ret. Time | Area     | Height | Area%   |
|-------|-----------|----------|--------|---------|
| 1     | 10.717    | 10833603 | 622991 | 95.062  |
| 2     | 11.685    | 562721   | 29968  | 4.938   |
| Total |           | 11396324 | 652958 | 100.000 |

## racemic-4h

Chromatogram

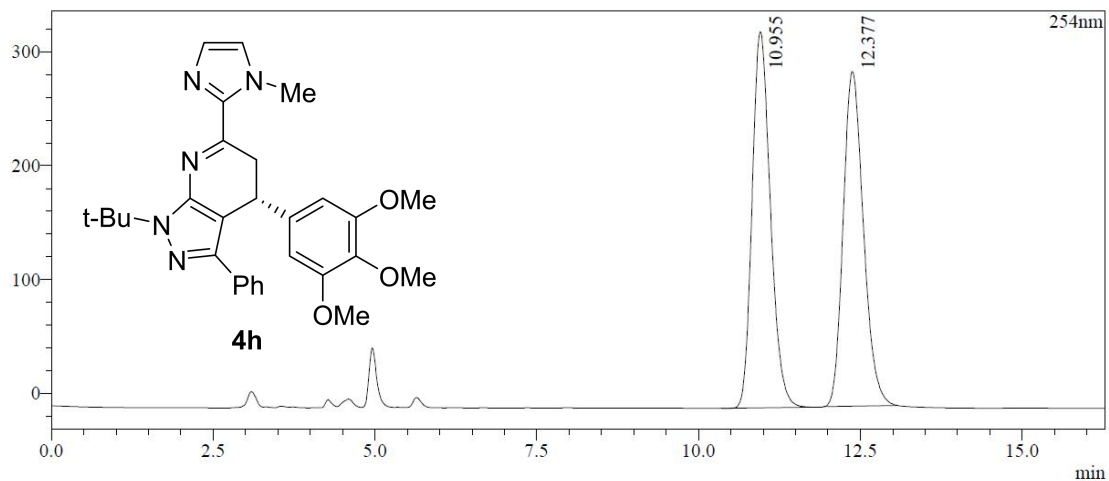

Peak Table

| Peak# | Ret. Time | Area     | Height | Area%   |
|-------|-----------|----------|--------|---------|
| 1     | 10.955    | 6495378  | 330081 | 50.414  |
| 2     | 12.377    | 6388813  | 293801 | 49.586  |
| Total |           | 12884191 | 623883 | 100.000 |

## chiral-4h

Chromatogram

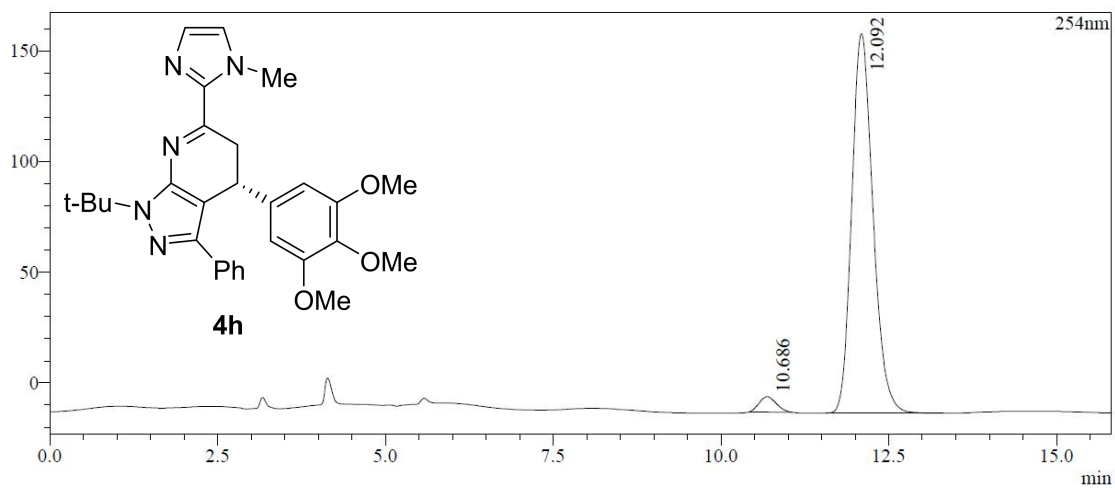

Peak Table

| Peak# | Ret. Time | Area    | Height | Area%   |
|-------|-----------|---------|--------|---------|
| 1     | 10.686    | 124458  | 6947   | 3.190   |
| 2     | 12.092    | 3777250 | 171474 | 96.810  |
| Total |           | 3901708 | 178421 | 100.000 |

## racemic-4i

Chromatogram

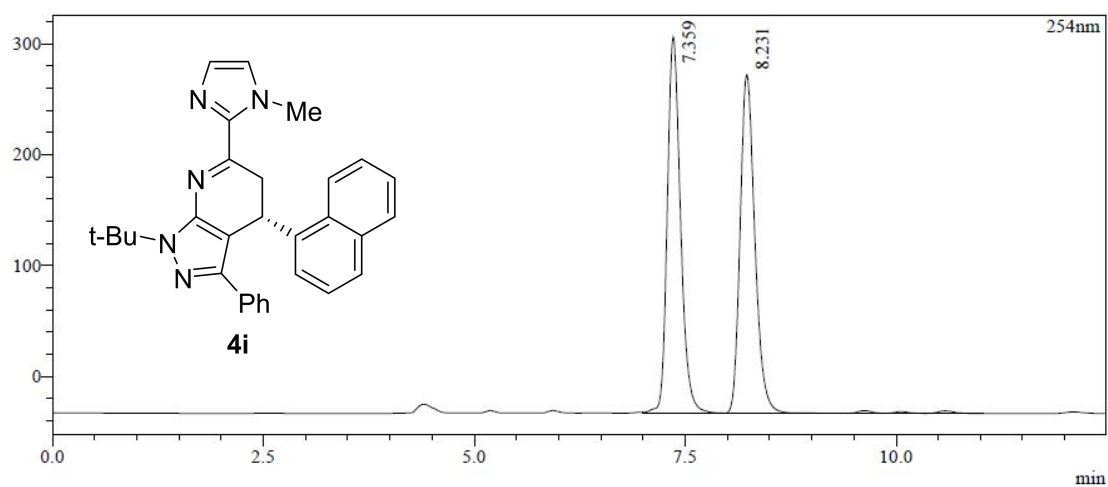

Peak Table

| Peak# | Ret. Time | Area    | Height | Area%   |
|-------|-----------|---------|--------|---------|
| 1     | 7.359     | 3733693 | 339687 | 49.375  |
| 2     | 8.231     | 3828197 | 305375 | 50.625  |
|       |           | 7561890 | 645062 | 100.000 |

## chiral-4i

Chromatogram

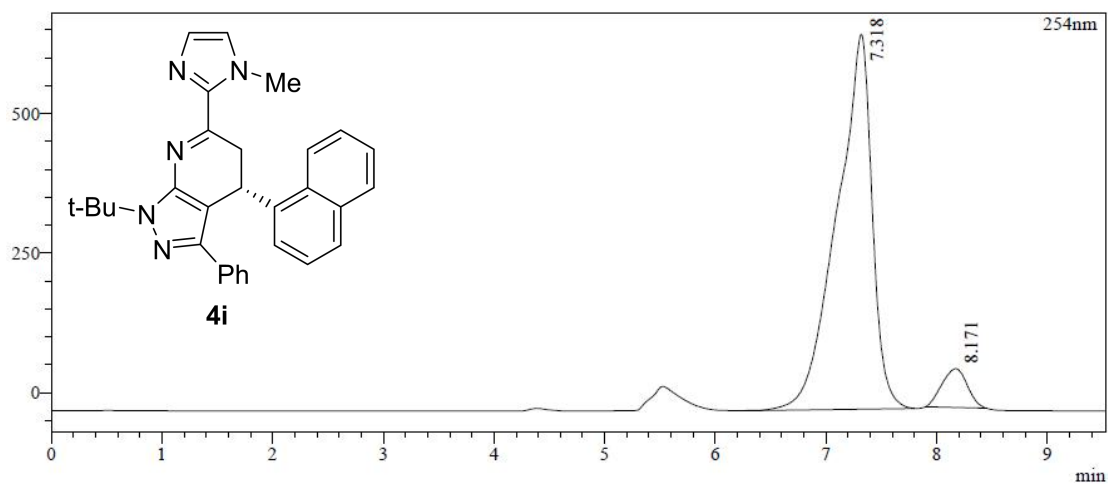

Peak Table

| Peak# | Ret. Time | Area     | Height | Area%   |
|-------|-----------|----------|--------|---------|
| 1     | 7.318     | 14881558 | 671215 | 93.073  |
| 2     | 8.171     | 1107503  | 69239  | 6.927   |
|       |           | 15989061 | 740454 | 100.000 |



## racemic-4j

Chromatogram

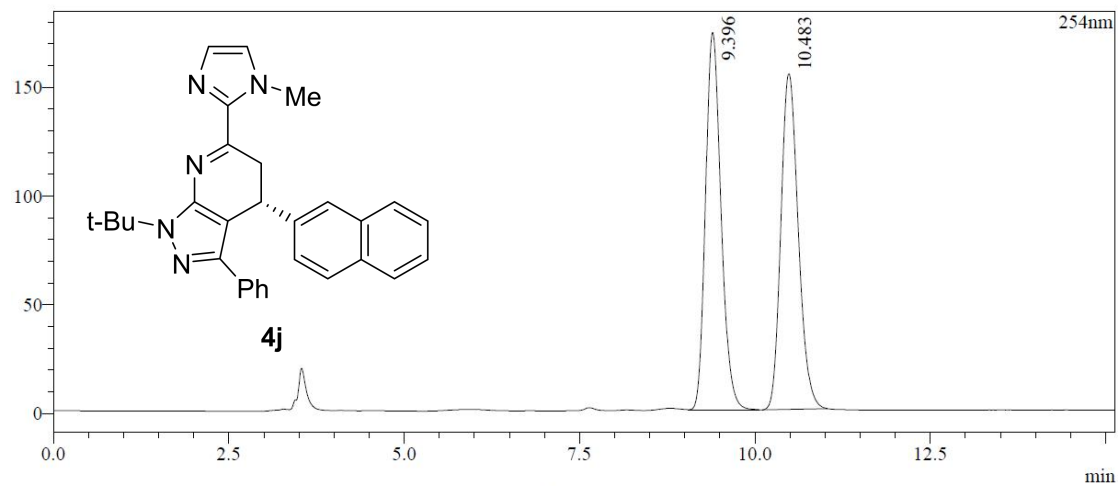

Peak Table

| Peak# | Ret. Time | Area    | Height | Area%   |
|-------|-----------|---------|--------|---------|
| 1     | 9.396     | 2672998 | 173439 | 50.175  |
| 2     | 10.483    | 2654318 | 154304 | 49.825  |
| Total |           | 5327316 | 327743 | 100.000 |

## chiral-4j

Chromatogram

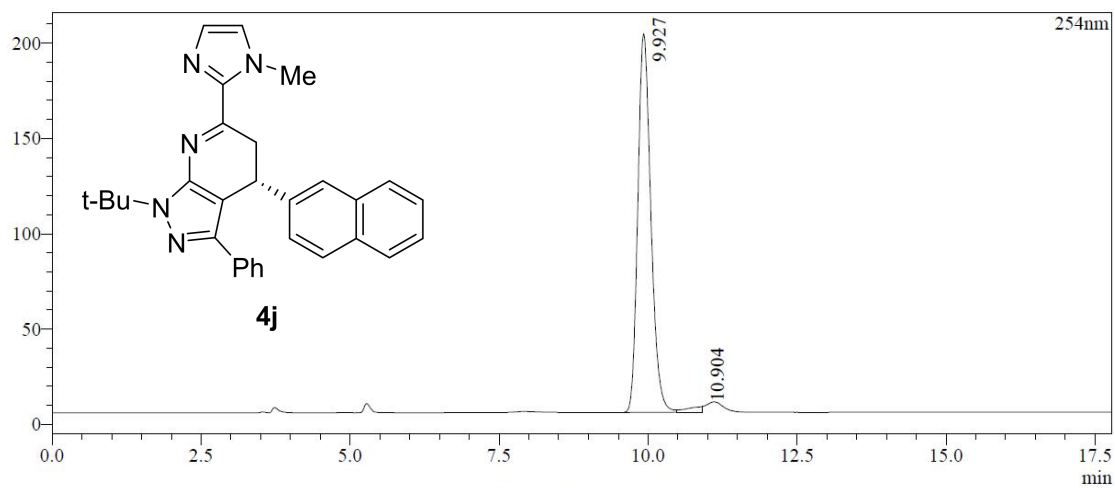

Peak Table

| Peak# | Ret. Time | Area    | Height | Area%   |
|-------|-----------|---------|--------|---------|
| 1     | 9.927     | 3030602 | 198664 | 98.269  |
| 2     | 10.904    | 53374   | 2964   | 1.731   |
| Total |           | 3083976 | 201629 | 100.000 |

## racemic-4k

Chromatogram

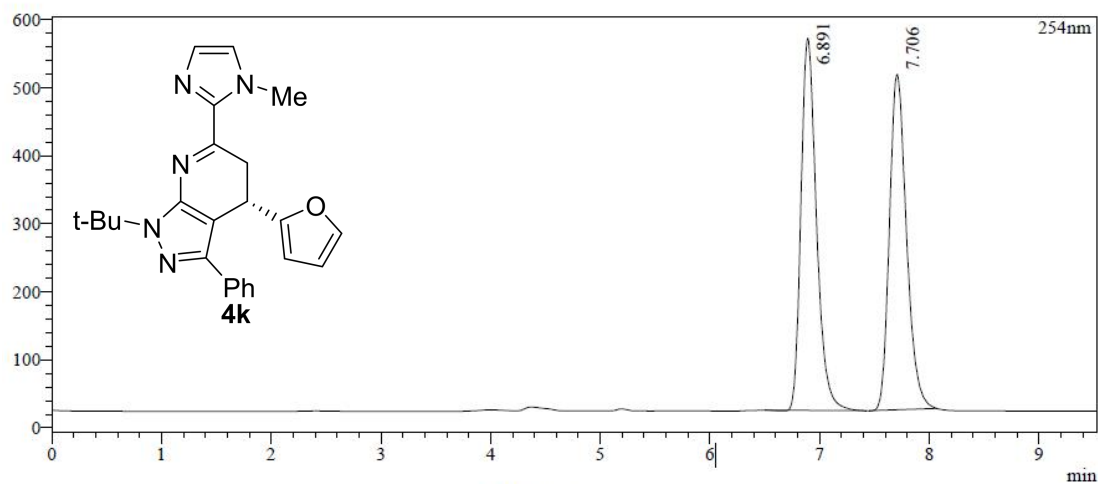

Peak Table

| Peak# | Ret. Time | Area     | Height  | Area%   |
|-------|-----------|----------|---------|---------|
| 1     | 6.891     | 5377044  | 547707  | 50.223  |
| 2     | 7.706     | 5329331  | 493375  | 49.777  |
|       |           | 10706376 | 1041082 | 100.000 |

## chiral-4k

Chromatogram

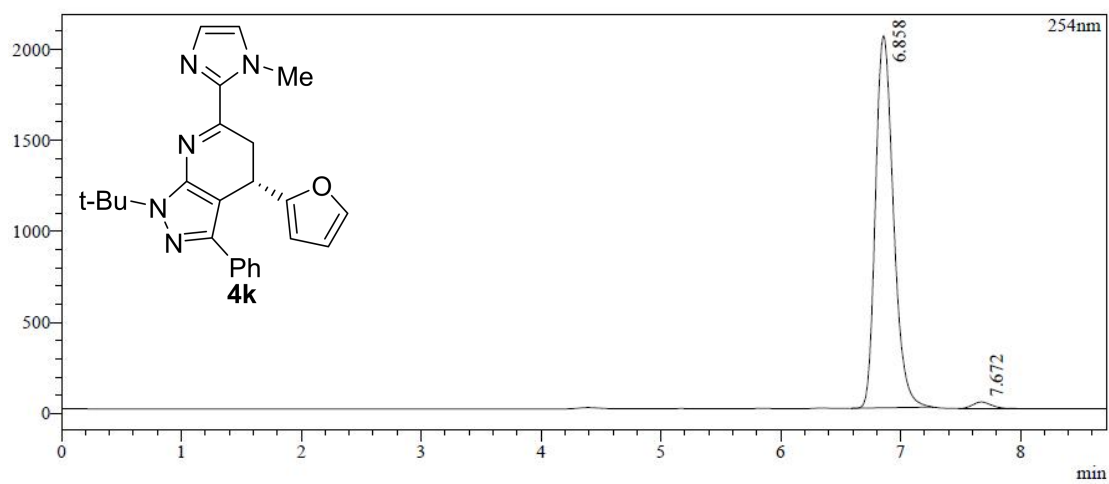

Peak Table

| Peak# | Ret. Time | Area     | Height  | Area%   |
|-------|-----------|----------|---------|---------|
| 1     | 6.858     | 21283660 | 2042974 | 98.226  |
| 2     | 7.672     | 384459   | 35700   | 1.774   |
|       |           | 21668119 | 2078674 | 100.000 |

## racemic-4I

Chromatogram

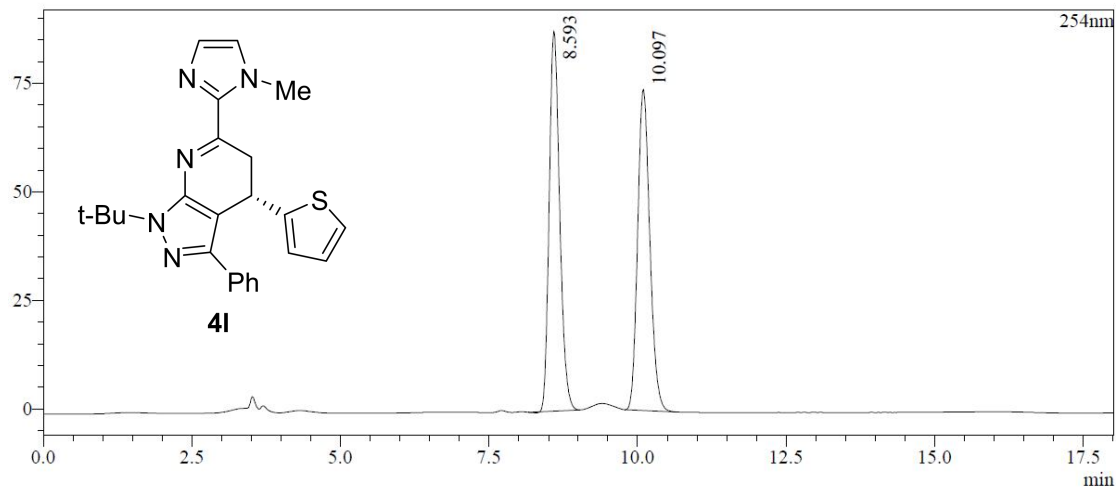

Peak Table

| Peak# | Ret. Time | Area    | Height | Area%   |
|-------|-----------|---------|--------|---------|
| 1     | 8.593     | 1075489 | 87469  | 50.443  |
| 2     | 10.097    | 1056607 | 73891  | 49.557  |
| Total |           | 2132095 | 161360 | 100.000 |

## chiral-4I

Chromatogram

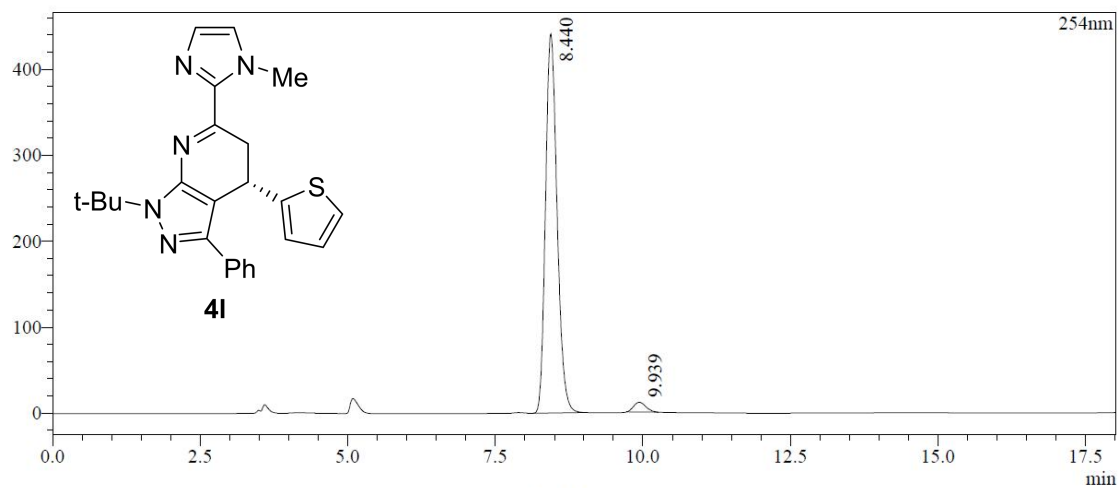

Peak Table

| Peak# | Ret. Time | Area    | Height | Area%   |
|-------|-----------|---------|--------|---------|
| 1     | 8.440     | 6021802 | 441631 | 97.420  |
| 2     | 9.939     | 159462  | 11187  | 2.580   |
| Total |           | 6181264 | 452819 | 100.000 |

## racemic-4m

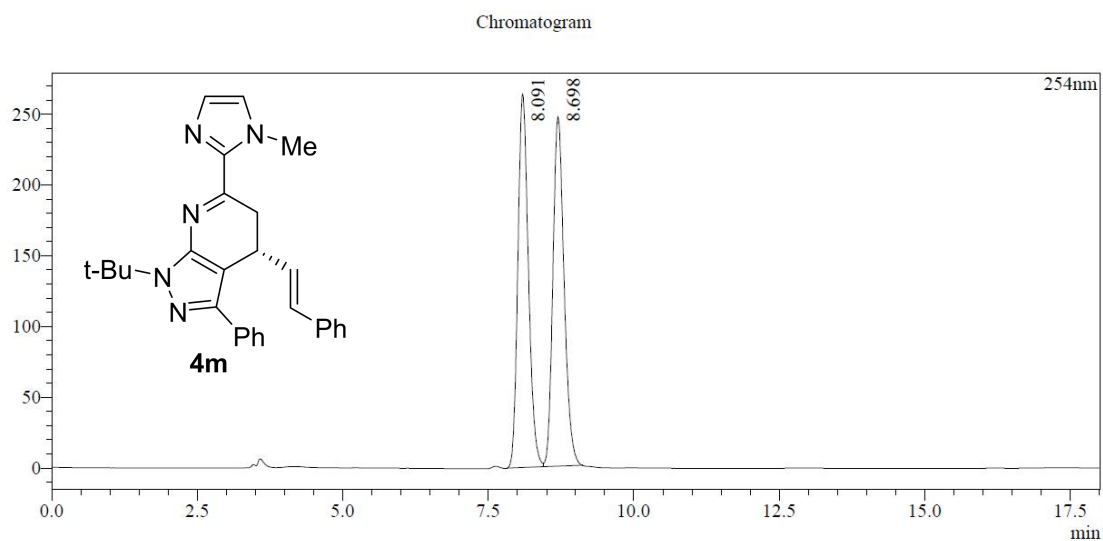

Peak Table

| Peak# | Ret. Time | Area    | Height | Area%   |
|-------|-----------|---------|--------|---------|
| 1     | 8.091     | 3319399 | 263957 | 50.095  |
| 2     | 8.698     | 3306765 | 246888 | 49.905  |
| Total |           | 6626164 | 510845 | 100.000 |

## chiral-4m

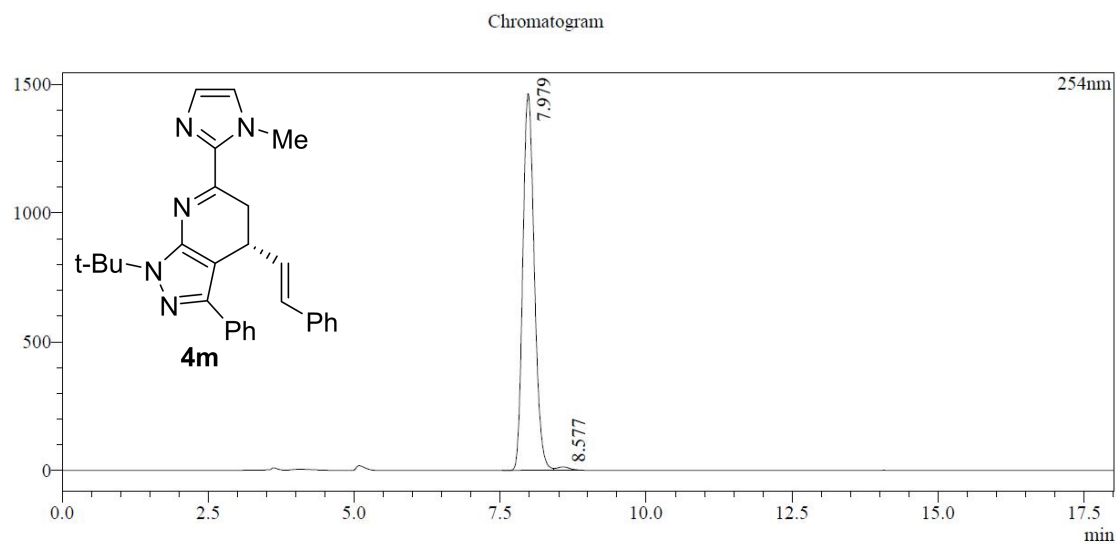

Peak Table

| Peak# | Ret. Time | Area     | Height  | Area%   |
|-------|-----------|----------|---------|---------|
| 1     | 7.979     | 20005846 | 1462492 | 99.060  |
| 2     | 8.577     | 189838   | 13027   | 0.940   |
| Total |           | 20195685 | 1475519 | 100.000 |

## racemic-4n

Chromatogram

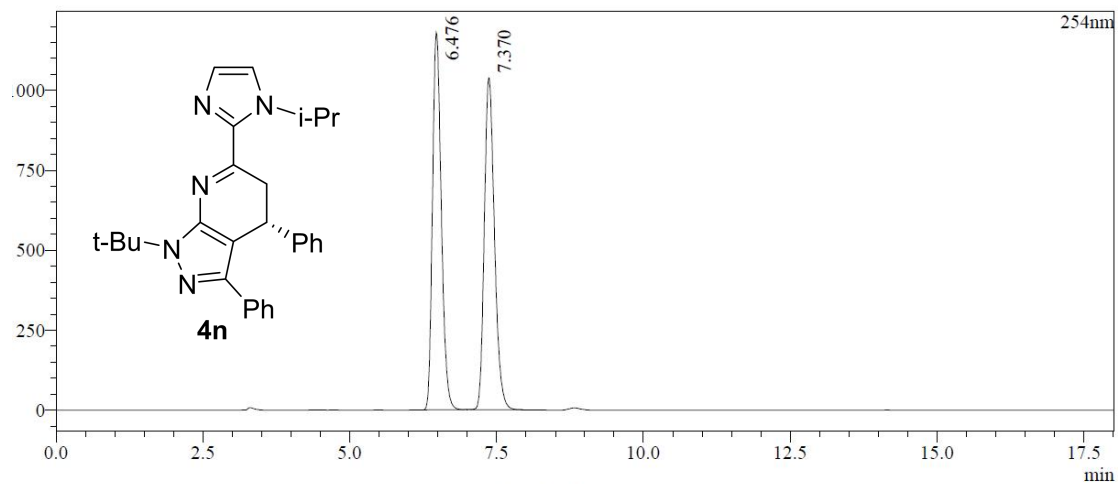

Peak Table

| Peak# | Ret. Time | Area     | Height  | Area%   |
|-------|-----------|----------|---------|---------|
| 1     | 6.476     | 12340734 | 1180480 | 49.688  |
| 2     | 7.370     | 12495913 | 1038086 | 50.312  |
| Total |           | 24836647 | 2218566 | 100.000 |

## chiral-4n

Chromatogram

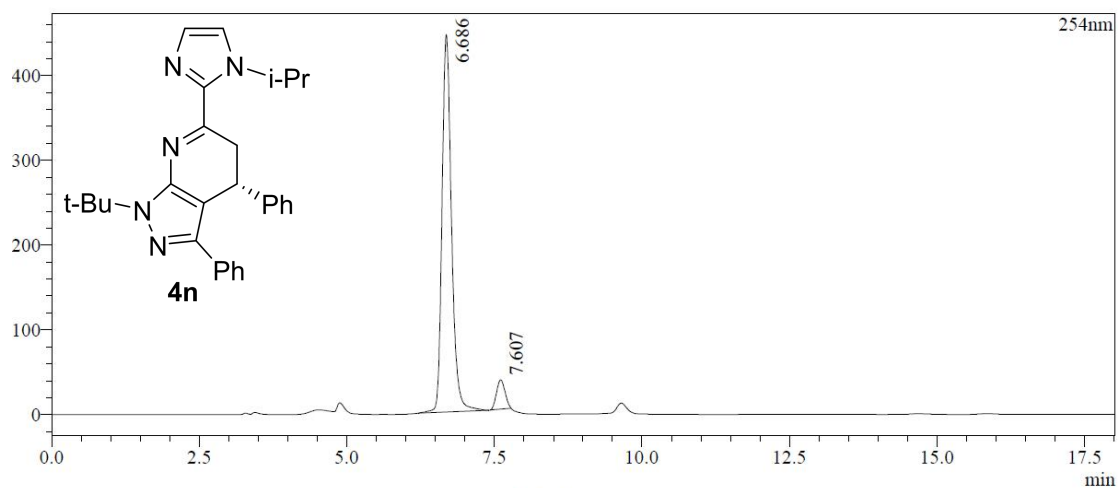

Peak Table

| Peak# | Ret. Time | Area    | Height | Area%   |
|-------|-----------|---------|--------|---------|
| 1     | 6.686     | 4983551 | 445047 | 93.511  |
| 2     | 7.607     | 345833  | 34440  | 6.489   |
| Total |           | 5329384 | 479488 | 100.000 |

## VI. Single Crystal X-Ray Diffraction of 4g

Crystal data and structure refinement for **4g**. The method for crystal growth: mixture of Petroleum ether and ethyl acetate, at room temperature. X-ray derived ORTEP of **4g** with thermal ellipsoids shown at the 35% probability level.

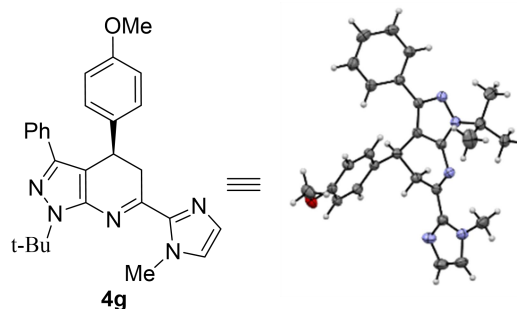

CCDC: 2321389

|                                 |                                                                                                                               |
|---------------------------------|-------------------------------------------------------------------------------------------------------------------------------|
| Identification code             | <b>4g</b>                                                                                                                     |
| Empirical formula               | C <sub>27</sub> H <sub>29</sub> N <sub>5</sub> O                                                                              |
| Formula weight                  | 439.55                                                                                                                        |
| Temperature                     | 173.0 K                                                                                                                       |
| Wavelength                      | 1.54178 Å                                                                                                                     |
| Crystal system                  | Triclinic                                                                                                                     |
| Space group                     | P-1                                                                                                                           |
| Unit cell dimensions            | a = 10.4283(2) Å      α = 106.2550(10)°<br>b = 10.7638(2) Å      β = 113.6160(10)°<br>c = 12.6122(2) Å      γ = 100.9400(10)° |
| Volume                          | 1169.63(4) Å <sup>3</sup>                                                                                                     |
| Z                               | 2                                                                                                                             |
| Density (calculated)            | 1.248 Mg/m <sup>3</sup>                                                                                                       |
| Absorption coefficient          | 0.618 mm <sup>-1</sup>                                                                                                        |
| F(000)                          | 468                                                                                                                           |
| Crystal size                    | 0.25 x 0.21 x 0.19 mm <sup>3</sup>                                                                                            |
| Theta range for data collection | 4.165 to 72.061°                                                                                                              |
| Index ranges                    | -12 ≤ h ≤ 12, -13 ≤ k ≤ 13, -15 ≤ l ≤ 15                                                                                      |
| Reflections collected           | 28682                                                                                                                         |
| Independent reflections         | 4573 [R(int) = 0.0505]                                                                                                        |
| Completeness to theta = 67.679° | 99.3 %                                                                                                                        |
| Absorption correction           | Semi-empirical from equivalents                                                                                               |

|                                      |                                    |
|--------------------------------------|------------------------------------|
| Max. and min. transmission           | 0.7536 and 0.6970                  |
| Refinement method                    | Full-matrix least-squares on F2    |
| Data / restraints / parameters       | 4573 / 0 / 303                     |
| Goodness-of-fit on F2                | 1.040                              |
| Final R indices [ $I > 2\sigma(I)$ ] | R1 = 0.0408, wR2 = 0.0984          |
| R indices (all data)                 | R1 = 0.0486, wR2 = 0.1037          |
| Extinction coefficient               | n/a                                |
| Largest diff. peak and hole          | 0.190 and -0.192 e.Å <sup>-3</sup> |
